# Supplementary material for: Maternal over-the-counter analgesics use during pregnancy and adverse perinatal outcomes: cohort study of 151 141 singleton pregnancies
Source: PubMed Central journal article supplement — BMJ Open. 2022 May 2;12(5):e048092. doi: 10.1136/bmjopen-2020-048092 (PMC9066494; doi:10.1136/bmjopen-2020-048092), 2022-05-02
Supplement: bmjopen-2020-048092.draft_revisions.pdf [file bmjopen-2020-048092.draft_revisions.pdf]

# BMJ Open

BMJ Open is committed to open peer review. As part of this commitment we make the peer review history of every article we publish publicly available.

When an article is published we post the peer reviewers' comments and the authors' responses online. We also post the versions of the paper that were used during peer review. These are the versions that the peer review comments apply to.

The versions of the paper that follow are the versions that were submitted during the peer review process. They are not the versions of record or the final published versions. They should not be cited or distributed as the published version of this manuscript.

BMJ Open is an open access journal and the full, final, typeset and author-corrected version of record of the manuscript is available on our site with no access controls, subscription charges or pay-per-view fees (<http://bmjopen.bmj.com>).

If you have any questions on BMJ Open's open peer review process please email [info.bmjopen@bmj.com](mailto:info.bmjopen@bmj.com)

# BMJ Open

## Maternal over-the-counter analgesics use during pregnancy and adverse perinatal outcomes: Cohort study of 151,141 singleton pregnancies

|                               |                                                                                                                                                                                                                                                                                                                                                         |
|-------------------------------|---------------------------------------------------------------------------------------------------------------------------------------------------------------------------------------------------------------------------------------------------------------------------------------------------------------------------------------------------------|
| Journal:                      | <i>BMJ Open</i>                                                                                                                                                                                                                                                                                                                                         |
| Manuscript ID                 | bmjopen-2020-048092                                                                                                                                                                                                                                                                                                                                     |
| Article Type:                 | Original research                                                                                                                                                                                                                                                                                                                                       |
| Date Submitted by the Author: | 29-Dec-2020                                                                                                                                                                                                                                                                                                                                             |
| Complete List of Authors:     | Zafeiri, Aikaterini; University of Aberdeen, School of Medicine, Medical Sciences and Nutrition<br>Hay, David ; University of Edinburgh<br>Fowler, Paul ; University of Aberdeen<br>Raja, Edwin Amalraj; University of Aberdeen, Medical Statistics Team<br>Mitchell, Rod; The University of Edinburgh<br>Bhattacharya, Sohinee; University of Aberdeen |
| Keywords:                     | Epidemiology < INFECTIOUS DISEASES, OBSTETRICS, CLINICAL PHARMACOLOGY                                                                                                                                                                                                                                                                                   |
|                               |                                                                                                                                                                                                                                                                                                                                                         |

SCHOLARONE™  
Manuscripts

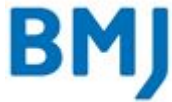

I, the Submitting Author has the right to grant and does grant on behalf of all authors of the Work (as defined in the below author licence), an exclusive licence and/or a non-exclusive licence for contributions from authors who are: i) UK Crown employees; ii) where BMJ has agreed a CC-BY licence shall apply, and/or iii) in accordance with the terms applicable for US Federal Government officers or employees acting as part of their official duties; on a worldwide, perpetual, irrevocable, royalty-free basis to BMJ Publishing Group Ltd ("BMJ") its licensees and where the relevant Journal is co-owned by BMJ to the co-owners of the Journal, to publish the Work in this journal and any other BMJ products and to exploit all rights, as set out in our [licence](#).

The Submitting Author accepts and understands that any supply made under these terms is made by BMJ to the Submitting Author unless you are acting as an employee on behalf of your employer or a postgraduate student of an affiliated institution which is paying any applicable article publishing charge ("APC") for Open Access articles. Where the Submitting Author wishes to make the Work available on an Open Access basis (and intends to pay the relevant APC), the terms of reuse of such Open Access shall be governed by a Creative Commons licence – details of these licences and which [Creative Commons](#) licence will apply to this Work are set out in our licence referred to above.

Other than as permitted in any relevant BMJ Author's Self Archiving Policies, I confirm this Work has not been accepted for publication elsewhere, is not being considered for publication elsewhere and does not duplicate material already published. I confirm all authors consent to publication of this Work and authorise the granting of this licence.

1 **Title:** Maternal over-the-counter analgesics use during pregnancy and adverse  
2 perinatal outcomes: Cohort study of 151,141 singleton pregnancies

3  
4 **Authors:** <sup>1</sup>Aikaterini ZAFEIRI, MSci, Ms, <sup>2</sup>Edwin A. RAJA, PhD, <sup>3</sup>Rod T. MITCHELL,  
5 MBChB, PhD, <sup>4</sup>David C. HAY, PhD, <sup>5</sup>Sohinee BHATTACHARYA, MBBS, PhD, <sup>1</sup>Paul  
6 A. FOWLER, FRSB, PhD

7 <sup>1</sup>Institute of Medical Sciences, School of Medicine, Medical Sciences and Nutrition,  
8 University of Aberdeen, Aberdeen, United Kingdom, <sup>2</sup>Medical Statistics Team,  
9 Institute of Applied Health Sciences, School of Medicine, Medical Sciences and  
10 Nutrition, University of Aberdeen, Aberdeen, United Kingdom, <sup>3</sup>MRC Centre for  
11 Reproductive Health, The Queen's Medical Research Institute, University of  
12 Edinburgh, 47 Little France Crescent, Edinburgh, EH16 4JT, UK, <sup>4</sup>MRC Centre for  
13 Regenerative Medicine, 5 Little France Drive, Edinburgh, UK, <sup>5</sup>Aberdeen Centre for  
14 Women's Health Research, Institute of Applied Health Sciences, School of Medicine,  
15 Medical Sciences and Nutrition, University of Aberdeen, Aberdeen, United Kingdom,

16 **Corresponding Author:** Aikaterini Zafeiri, Institute of Medical Sciences, School of  
17 Medicine, Medical Sciences and Nutrition, University of Aberdeen, Aberdeen, United  
18 Kingdom, cell phone number: (+44)7713837285, email: [r01az17@abdn.ac.uk](mailto:r01az17@abdn.ac.uk)

19 **Running Title:** Maternal over-the-counter analgesia and offspring outcomes

1  
2  
3 20 **Abstract**  
4

5  
6 21 OBJECTIVES  
7

8  
9 22 To identify any associations between *in utero* exposure to five over-the-counter (non-  
10  
11 23 prescription) analgesics (paracetamol, ibuprofen, aspirin, diclofenac, naproxen) and  
12  
13 24 adverse neonatal outcomes.  
14  
15

16 25 DESIGN  
17

18  
19 26 Retrospective cohort study using the Aberdeen Maternity and Neonatal Databank.  
20  
21

22 27 PARTICIPANTS  
23

24  
25 28 151,141 singleton pregnancies between 1985 and 2015.  
26  
27

28 29 MAIN OUTCOME MEASURES  
29

30  
31 30 Premature delivery (<37 weeks), stillbirth, neonatal death, birthweight, standardised  
32  
33 31 birthweight score, neonatal unit admission, APGAR score at 1 and 5 minutes, neural  
34  
35 32 tube and amniotic band defects, gastroschisis and, in males, cryptorchidism, and  
36  
37 33 hypospadias.  
38  
39

40  
41 34 RESULTS  
42

43  
44 35 83.7% of women taking over-the-counter analgesics reported first trimester use  
45  
46 36 when specifically asked about use at their first antenatal clinic visit. Pregnancies  
47  
48 37 exposed to at least one of the five analgesics were significantly independently  
49  
50 38 associated with increased risks for premature delivery <37 weeks (aOR=1.50,  
51  
52 39 95%CI 1.43-1.58), stillbirth (aOR=1.33, 95%CI 1.15-1.54), neonatal death  
53  
54 40 (aOR=1.56, 95%CI 1.27-1.93), birthweight <2,500g (aOR=1.28, 95%CI 1.20-1.37),  
55  
56 41 birthweight >4,000g (aOR=1.09, 95%CI 1.05-1.13), admission to neonatal unit  
57  
58  
59  
60

1  
2  
3 42 (aOR=1.57, 95%CI 1.51-1.64), APGAR score <7 at 1 minute (aOR=1.18, 95%CI  
4  
5 43 1.13-1.23) and 5 minutes (aOR=1.48, 95%CI 1.35-1.62), neural tube defects  
6  
7 44 (aOR=1.64, 95%CI 1.08-2.47) and hypospadias (aOR=1.27, 95%CI 1.05-1.54 males  
8  
9 45 only). The overall prevalence of over-the-counter analgesics use during pregnancy  
10  
11 46 was 29.1%, however it rapidly increased over the 30-year study period, to include  
12  
13 47 over 60% of women in the last seven years of the study. This makes our findings  
14  
15 48 highly relevant to the wider pregnant population.  
16  
17  
18  
19

## 20 49 CONCLUSIONS

21  
22  
23 50 Over-the-counter (non-prescription) analgesics consumption during pregnancy was  
24  
25 51 associated with a substantially higher risk for adverse perinatal health outcomes in  
26  
27 52 the offspring. The use of paracetamol in combination with other non-steroidal anti-  
28  
29 53 inflammatory drugs conferred the highest risk. The increased risks of adverse  
30  
31 54 neonatal outcomes associated with non-prescribed, over-the-counter, analgesics use  
32  
33 55 during pregnancy indicate that healthcare guidance for pregnant women regarding  
34  
35 56 analgesic use need urgent updating.  
36  
37  
38  
39

### 40 57 **Strengths and limitations of this study**

- 41  
42  
43 58 • This is one of the largest and most comprehensive studies of this type. It  
44  
45 59 includes consumption of five different analgesics during pregnancy in a large  
46  
47 60 cohort of singleton pregnancies. It examines associations with an extensive  
48  
49 61 range of offspring perinatal outcomes, while adjusting for important  
50  
51 62 confounding factors  
52  
53  
54 63 • Analgesic consumption was analysed both as use of a single compound and  
55  
56 64 in combinations of the five drugs considered in this study  
57  
58  
59  
60

1  
2  
3 65 • Details of the exact dose and timing of consumption during pregnancy was  
4  
5 66 not available within our dataset

6  
7  
8 67 • Follow-up of the offspring health later in life was not available at this time  
9

10  
11 68

12  
13  
14 69 **Funding** Biotechnology and Biological Sciences Research council (BBSRC) funding  
15  
16 70 under the EASTBIO doctoral training programme (grant number 1942576) to AZ and  
17  
18 71 EU Horizon 2020 project FREIA (Grant Number 825100) to PAF. RTM is supported  
19  
20 72 by MRC Centre for Reproductive Health Grant MR/N022556/1.  
21  
22

23  
24 73 **Key words** acetaminophen, aspirin, diclofenac, ibuprofen, *in utero* exposure,  
25  
26 74 naproxen, offspring outcomes, over-the-counter analgesics, offspring outcomes,  
27  
28 75 paracetamol, pregnancy  
29

30  
31 76  
32  
33  
34  
35  
36  
37  
38  
39  
40  
41  
42  
43  
44  
45  
46  
47  
48  
49  
50  
51  
52  
53  
54  
55  
56  
57  
58  
59  
60

## 77 Introduction

78 Globally 23-85% of women use one or more types of prescribed medications during  
79 pregnancy <sup>1,2</sup>. A similarly high proportion of expectant mothers self-medicate using  
80 non-prescription, “over-the-counter” (OTC) medicines <sup>3,4</sup> and use during pregnancy  
81 is becoming increasingly prevalent, especially in Western countries <sup>5</sup>. While some  
82 analgesics e.g. paracetamol are considered safe to consume throughout pregnancy,  
83 use of non-steroidal anti-inflammatory drugs (NSAIDs) is not recommended in  
84 pregnancy unless on the advice of a medical specialist and should be avoided  
85 beyond gestational week 30 because of the risk of premature closure of the ductus  
86 arteriosus. However, current evidence is largely conflicting regarding the safety of  
87 gestational analgesic use both for the pregnancy and offspring health <sup>6</sup>. Several  
88 studies have reported increased risks for multiple adverse outcomes including  
89 hypospadias, cryptorchidism, amniotic band defects and neural tube defects <sup>7-11</sup>,  
90 whilst others have not found significant associations <sup>12-17</sup>. Taken overall, this has led  
91 to significant concern that postnatal health is adversely affected by maternal  
92 analgesic use during pregnancy <sup>18</sup>.

93 The use of small cohorts in the current epidemiological studies makes it difficult to  
94 draw firm conclusions and definite recommendations<sup>12,17,19,20</sup>. There are other  
95 aspects of analgesic use that have to be taken into account. Firstly, due to their  
96 abundance, it is not always feasible to determine exact consumption rates and  
97 dosage. Secondly, even though the mechanisms of action for most of these  
98 compounds is not fully understood, most over-the-counter analgesics can diffuse  
99 through the placenta and reach the developing fetus <sup>21</sup>. Thirdly, maternal  
100 pharmacokinetics during pregnancy are altered and there are limited pregnancy  
101 safety data for these compounds.



1  
2  
3 102 Given the diversity in study population, methodology, sample size and findings in the  
4  
5 103 published studies, we conclude that more extensive data from larger cohorts are  
6  
7 104 essential in order to understand the risks over-the-counter analgesic use during  
8  
9 105 pregnancy pose to neonatal health and function. Here we address many limitations  
10  
11 106 of previous studies by analysing one of the largest cohorts, widest range of health  
12  
13 107 data and, pregnancy use of five over-the-counter analgesics consumed in  
14  
15 108 combination or separately. We report on the prevalence of maternal consumption of  
16  
17 109 five different over-the-counter analgesics during pregnancy and their associations  
18  
19 110 with offspring neonatal outcomes using a large cohort of 151,141 singleton  
20  
21 111 pregnancies spanning three decades of population-based data from a single  
22  
23 112 maternity hospital serving the entire population of Aberdeenshire in the North East of  
24  
25 113 Scotland.  
26  
27  
28  
29  
30  
31  
32  
33  
34  
35  
36  
37  
38  
39  
40  
41  
42  
43  
44  
45  
46  
47  
48  
49  
50  
51  
52  
53  
54  
55  
56  
57  
58  
59  
60

## 114 **Materials and Methods**

115 This retrospective cohort study utilised data collected in the Aberdeen Maternity and  
116 Neonatal Databank (AMND) in Aberdeen, UK on 151,141 pregnancies over a 30  
117 year period (1985-2015). Details about AMND have been previously published <sup>22</sup>.  
118 Data were collected from medical notes of women retrospectively after delivery.  
119 Women were specifically asked about their use of over-the-counter (non-  
120 prescription) analgesics at their first antenatal clinic. Data were entered by dedicated  
121 coding staff into a computerised database. Data validity was ensured via checking  
122 completeness of data entry against NHS (UK National Health Service) returns  
123 monthly and constant data cleaning and validation against case notes reported  
124 quarterly by the Data Management team to the AMND Steering Committee. A  
125 research protocol was submitted and approved by the AMND Steering Committee  
126 before data extraction. Approval was received on 6 June 2018. The dataset was fully  
127 anonymised, therefore there was no requirement for NHS ethics committee approval.  
128 There was no involvement of patients or the public in the design, or conduct, or  
129 reporting, or dissemination plans of our research.

130 The main analysis considered consumption during pregnancy of at least one out of  
131 five different analgesics: paracetamol (no; yes), ibuprofen (no; yes), naproxen (no;  
132 yes), diclofenac (no; yes) or aspirin (no; yes) as the exposure group against no  
133 analgesic consumption as the unexposed group. Then, three sub-group analyses  
134 against the control group were performed using only paracetamol, only diclofenac, or  
135 at least one analgesic from aspirin/naproxen/ibuprofen as exposure groups,  
136 excluding pregnancies exposed to multiple analgesics at the same time. As 98.3% of  
137 pregnancies using diclofenac were between 2005 and 2015, diclofenac sub-group

1  
2  
3 138 analysis only considered pregnancies during that time frame in order to rule out any  
4  
5 139 temporal effect.  
6  
7

8 140 The offspring outcomes compared between control and exposed groups were:  
9  
10 141 gestation at delivery (preterm <37 gestation weeks, term  $\geq$ 37 gestation weeks),  
11  
12 142 pregnancy outcome (livebirth, stillbirth, neonatal death), baby weight (low birth  
13  
14 143 weight (LBW)  $\leq$ 2,499 g, high birth weight (HBW)  $\geq$ 4,000 g, normal birth weight  
15  
16 144 (NBW) 2,500g-3,999 g), standardised birthweight score was considered as a  
17  
18 145 continuous variable as previously described by Campbell and colleagues<sup>23</sup>, baby  
19  
20 146 admission to neonatal unit (no; yes), APGAR score at one and five minutes (<7,  $\geq$ 7),  
21  
22 147 cryptorchidism (no; yes) (ICD-10 code Q53), neural tube defects (no; yes) (ICD-10  
23  
24 148 code Q00-07), amniotic band defects (no; yes) (ICD-10 codes Q70-74), hypospadias  
25  
26 149 (no; yes) (ICD-10 code Q54), gastroschisis (no; yes) (ICD-10 code Q79.3). A  
27  
28 150 composite outcome (presence of at least one congenital anomaly (no; yes)) was  
29  
30 151 created using the variables neural tube defects, amniotic band defects, and  
31  
32 152 gastroschisis and, in males, cryptorchidism and hypospadias.  
33  
34  
35  
36  
37  
38

39 153 The baseline characteristics compared between exposed and unexposed  
40  
41 154 pregnancies were (reference category first): year of delivery (1985-1994, 1995-2004,  
42  
43 155 2005-2015), maternal age at delivery (20-25, <20, 26-35, >35 years), previous  
44  
45 156 pregnancy (no; yes), maternal body mass index (BMI) (normal weight 18.5-24.9  
46  
47 157 kg/m<sup>2</sup>, underweight <18.5 kg/m<sup>2</sup>, overweight 25-29.9 kg/m<sup>2</sup>, obese  $\geq$ 30 kg/m<sup>2</sup>),  
48  
49 158 maternal first antenatal visit (1st, 2nd, 3rd trimester), maternal smoking status (non-  
50  
51 159 smoker, smoker, ex-smoker), Scottish Index of Multiple Deprivation (SIMD) decile (1-  
52  
53 160 6, 7-10, decreasing deprivation with increasing score), maternal hypertensive  
54  
55 161 disorders (no disorder, gestational hypertension, preeclampsia, eclampsia), maternal  
56  
57 162 antepartum haemorrhage (no haemorrhage, abruption, placental previa), type of  
58  
59  
60

1  
2  
3 163 labour (spontaneous, elective caesarean section, induced), type of delivery  
4  
5 164 (spontaneous vaginal delivery, instrumental, caesarean section), analgesia during  
6  
7 165 labour (no; yes), baby presentation at delivery (occiput anterior, occiput posterior),  
8  
9 166 baby sex (female; male).

### 13 167 **Patient and Public Involvement**

16 168 This was a retrospective analysis of data on singleton pregnancies over a 30-year  
17  
18 169 period. Therefore, there was no involvement of patients or the public in the design,  
19  
20 170 conduct, reporting or any other aspect of the study.

21  
22  
23  
24 171

### 26 172 **Statistical Analysis**

29 173 Baseline characteristics were compared between exposed and unexposed  
30  
31 174 pregnancies to any analgesic using  $\chi^2$  test for categorical variables and t-test for  
32  
33 175 normally distributed continuous variables as appropriate. Relationships between  
34  
35 176 exposures and outcomes were examined by binary logistic regression for binary  
36  
37 177 outcome variables, multinomial logistic regression for nominal categorical outcome  
38  
39 178 variables, and multiple linear regression for continuous variables. The strength of  
40  
41 179 association was reported as odds ratios (ORs) with 95% confidence intervals (CI).  
42  
43 180 The socio-demographic characteristics that were likely to confound our exposure-to-  
44  
45 181 outcome path were identified using a directed acyclic graph (DAG) (Figure S1)<sup>24</sup>.  
46  
47 182 Factors that were associated with consumption of over-the-counter analgesics during  
48  
49 183 pregnancy at 10% level of significance and deemed clinically relevant, were included  
50  
51 184 in the model as confounders. All outcomes were adjusted for year of delivery,  
52  
53 185 maternal age at delivery, SIMD and maternal first antenatal visit. In addition to these  
54  
55 186 confounders, individual outcomes were adjusted for relevant cofactors. Gestation at

1  
2  
3 187 delivery and pregnancy outcome were both additionally adjusted for maternal  
4  
5 188 hypertensive disorders and antepartum haemorrhage. Weight of the baby, neonatal  
6  
7 189 unit admission, cryptorchidism, neural tube defects, amniotic band defects,  
8  
9  
10 190 hypospadias and gastroschisis variables were also adjusted for gestation at delivery.  
11  
12 191 APGAR score at one and five minutes were adjusted for type of delivery. A p-value  
13  
14 192 of less than 0.05 was considered statistically significant. All statistical analyses were  
15  
16 193 carried out using IBM SPSS Statistics version 25.0 (Released 2017. IBM SPSS  
17  
18 194 Statistics for Windows, Armonk, NY: IBM Corp.). R version 3.6.2 was used to  
19  
20  
21 195 generate Figure 2.  
22  
23  
24  
25  
26  
27  
28  
29  
30  
31  
32  
33  
34  
35  
36  
37  
38  
39  
40  
41  
42  
43  
44  
45  
46  
47  
48  
49  
50  
51  
52  
53  
54  
55  
56  
57  
58  
59  
60

## 196 Results

197 83.7% of women taking over-the-counter analgesics reported first trimester use  
198 when specifically asked about use at their first antenatal clinic. Overall, from the total  
199 151,141 pregnancies across 30 years in 107,143 (70.9%) pregnancies, no over-the-  
200 counter analgesic consumption was reported. At least one over-the-counter  
201 analgesic was consumed in 43,998 (29.1%) pregnancies, whereas paracetamol use  
202 alone was reported in 24,099 (18.4%) pregnancies. Diclofenac use was observed in  
203 20.0% of pregnancies in the 10-year period when diclofenac was available over-the-  
204 counter (without prescription). Finally, at least one out of three analgesics (naproxen,  
205 ibuprofen, aspirin) was consumed in 762 (0.7%) pregnancies (Figure 1).

206 Prevalence of use for all five analgesics increased dramatically over the 30-year  
207 study period (1985-2015) (Figure 2). Percentage of pregnancies with consumption of  
208 at least one analgesic increased from 1.8% in 1985 to 70.6% in 2015. Paracetamol  
209 was consumed in 1.3% of pregnancies in 1985 and it continuously increased  
210 reaching 42.2% in 2015. Naproxen, ibuprofen or aspirin consumption during  
211 pregnancy was less prevalent, however it also increased during the 30-year study  
212 period, starting at 0.5% in 1985 and reaching 1.9% in 2015. Diclofenac was  
213 consumed in very few pregnancies between 1985 (<0.01%) and 2005 (0.2%).  
214 Percentage of consumption, however, dramatically increased during the next decade  
215 following deregulation of diclofenac, reaching 25.0% in just one year (2006) and  
216 45.6% of all pregnancies in 2015.

217 Table 1 compares the baseline characteristics between the unexposed group of  
218 pregnancies where no analgesic was consumed and each of the exposure groups. In  
219 most, but not all, comparisons across all four analyses, there was a statistically

1  
2  
3 220 significant difference ( $p < 0.001$ ) for most variables. In the paracetamol sub-group  
4  
5 221 analysis, baby presentation at delivery ( $p = 0.525$ ) and sex of the baby ( $p = 0.861$ ) were  
6  
7 222 not significantly different between the groups. In the analysis considering  
8  
9 223 consumption of at least one analgesic from aspirin/naproxen/ibuprofen, again the  
10 224 variables for baby presentation at delivery ( $p = 0.093$ ) and sex of the baby ( $p = 0.732$ ),  
11  
12 225 together with maternal smoking status ( $p = 0.132$ ) and maternal antepartum  
13  
14 226 haemorrhage ( $p = 0.434$ ) were not statistically different compared to the unexposed  
15  
16 227 group. All variables were statistically different between unexposed and exposed  
17  
18 228 groups for the main analysis and diclofenac sub-group analysis.  
19  
20  
21  
22  
23

24 229 Table 2 summarises the comparison of neonatal outcomes between the unexposed  
25  
26 230 group (no analgesic at all) and the exposed groups of at least one analgesic, only  
27  
28 231 paracetamol and at least one out of aspirin/naproxen/ibuprofen. Comparison of  
29  
30 232 outcomes for the diclofenac sub-group analysis is shown in Table 3.  
31  
32  
33

34 233

### 37 234 **All analgesics and neonatal outcomes**

38  
39  
40 235 As shown in Table 2, compared to unexposed pregnancies in which women did not  
41  
42 236 use any analgesic, pregnancies with consumption of at least one analgesic  
43  
44 237 (paracetamol, diclofenac, aspirin, naproxen, ibuprofen) were independently  
45  
46 238 associated with significantly higher odds for premature delivery (aOR=1.50, 95%CI  
47  
48 239 1.43-1.58), stillbirth (aOR=1.33, 95%CI 1.15-1.54), LBW (aOR=1.28, 95%CI 1.20-  
49  
50 240 1.37), HBW (aOR=1.09, 95%CI 1.05-1.13), baby admission to neonatal unit  
51  
52 241 (aOR=1.57, 95%CI 1.51-1.64), APGAR score <7 at five minutes (aOR=1.48, 95%CI  
53  
54 242 1.35-1.62), neural tube defects (aOR=1.64, 95%CI 1.08-2.47) and hypospadias  
55  
56 243 (aOR=1.27, 95%CI 1.05-1.54) in adjusted analyses. Significantly decreased odds for  
57  
58  
59  
60

1  
2  
3 244 APGAR score <7 at one minute were found in the crude analysis (cOR=0.96, 95%CI  
4  
5 245 0.92-0.99), however when adjusted for year of delivery, maternal age at delivery,  
6  
7 246 SIMD, first gestational booking and type of delivery, the significance changed  
8  
9 247 direction showing significantly increased odds (aOR=1.18, 95%CI 1.13-1.23). A  
10  
11 248 significantly lower standardised birthweight score (aOR=0.046, 95%CI 0.032-0.059)  
12  
13 249 was found for the exposure group compared to no analgesic at all. Cryptorchidism  
14  
15 250 (aOR=0.92, 95%CI 0.77-1.11), amniotic band defects (aOR=1.02, 95%CI 0.71-1.47),  
16  
17 251 gastroschisis (aOR=1.10, 95%CI 0.56-2.20) and the composite outcome variable  
18  
19 252 (aOR=1.12, 95%CI 0.99-1.26), were all associated with increased odds in the  
20  
21 253 exposure group compared to not exposed, however the association was not  
22  
23 254 significant in the adjusted model. There was no significant association between  
24  
25 255 neonatal death and exposure to at least one analgesic in the crude analysis  
26  
27 256 (cOR=1.19, 95%CI 0.99-1.42), however there were significantly higher odds of  
28  
29 257 neonatal death in the adjusted analysis (aOR=1.56, 95%CI 1.27-1.93) in the  
30  
31 258 exposed group compared to control.  
32  
33  
34  
35  
36  
37  
38  
39  
40

#### 41 260 **Paracetamol and neonatal outcomes**

42  
43  
44 261 In the sub-group analysis considering only paracetamol consumption during  
45  
46 262 pregnancy as our exposure group, most of the associations reported in the main  
47  
48 263 analysis remained significant with the same direction of significance (Table 2). The  
49  
50 264 differences were: maternal paracetamol consumption during pregnancy was  
51  
52 265 associated with significantly decreased odds for offspring HBW (cOR=0.94, 95%CI  
53  
54 266 0.90-0.99) in the crude analysis however significance was lost in the adjusted model  
55  
56 267 (aOR=0.98, 95%CI 0.93-1.02), and there were no significant associations in the  
57  
58  
59  
60



1  
2  
3 268 adjusted models for neural tube defects (aOR=1.21, 95%CI 0.71-2.06) and  
4  
5 269 hypospadias (aOR=1.07, 95%CI 0.84-1.37).  
6  
7  
8  
9 270

### 11 271 **Aspirin/naproxen/ibuprofen and neonatal outcomes**

14 272 Consumption of at least one analgesic from aspirin, naproxen or ibuprofen during  
15  
16 273 pregnancy was compared against the same control group of pregnancies where no  
17  
18 274 analgesic was used (Table 2). Again, when comparing associations between groups  
19  
20 275 in this sub-group analysis and main analysis, fewer outcome variants showed similar  
21  
22 276 significance pattern. The only shared significant associations were for increased  
23  
24 277 odds for premature delivery (aOR=1.42, 95%CI 1.08-1.86), stillbirth (aOR=2.34,  
25  
26 278 95%CI 1.29-4.25) and baby admission to neonatal unit (aOR=1.54, 95%CI 1.22-  
27  
28 279 1.94) in the adjusted regression analyses.  
29  
30  
31  
32  
33  
34 280

### 36 281 **Diclofenac and neonatal outcomes**

39 282 In the sub-group analysis of pregnancies coinciding with non-prescription, over-the-  
40  
41 283 counter, availability of diclofenac (years 2005-2015) were considered, and outcomes  
42  
43 284 compared between the diclofenac group and no analgesic consumption group (Table  
44  
45 285 3). Compared to the main analysis, diclofenac consumption during pregnancy was  
46  
47 286 not significantly associated with premature delivery (aOR=1.10, 95%CI 0.99-1.22),  
48  
49 287 neonatal death (aOR=1.26, 95%CI 0.73-2.15) and APGAR score <7 in one minute  
50  
51 288 (aOR=0.93, 95%CI 0.83-1.04) in the adjusted models. Associations with APGAR  
52  
53 289 score <7 in five minutes (aOR=0.94, 95%CI 0.72-1.23), cryptorchidism (aOR=1.05,  
54  
55 290 95%CI 0.78-1.42), amniotic band defects (aOR=0.81, 95%CI 0.41-1.58) and  
56  
57 291 gastroschisis (aOR=2.93, 95%CI 0.97-8.88) were no longer significant in both crude  
58  
59  
60

1  
2  
3 292 and adjusted analyses. Maternal consumption of diclofenac was independently  
4  
5 293 associated with a significant decrease in stillbirth (aOR=0.59, 95%CI 0.41-0.87). It is  
6  
7  
8 294 also interesting to note that diclofenac was the only sub-group analysis agreeing with  
9  
10 295 the main analysis (exposure to at least one analgesic) on the significance of  
11  
12 296 exposure association with increased incidence of neural tube defects (aOR=3.62,  
13  
14 297 95%CI 1.95-6.74) and hypospadias (aOR=1.49, 95%CI 1.09-2.03) compared to  
15  
16  
17 298 unexposed pregnancies in adjusted models.  
18  
19  
20 299

## 300 Discussion

### 301 Main Findings

302 Consumption of paracetamol, ibuprofen, aspirin and naproxen during pregnancy,  
303 either in combination or separately, was significantly associated with increased  
304 premature delivery, stillbirth, neonatal death, LBW, abnormal standardised  
305 birthweight score and more frequent admission to neonatal unit. Consumption of  
306 paracetamol alone was further associated with higher odds for APGAR score <7 at  
307 one and five minutes both in crude and adjusted analyses. There was a dramatic  
308 increase in the frequency of over-the-counter (non-prescription) analgesic use in  
309 pregnancies between 1985 and 2015, reaching 70.5% of women in the final decade  
310 of our study. This means that our findings are applicable far beyond the percentage  
311 (between 14% and 38%)<sup>25</sup> of pregnant women with underlying health deficits related  
312 to the adverse outcomes we report here.

313

314 Diclofenac use increased steeply from 2005 (Figure 2A), which reflects the change in  
315 Scottish legislation, leading to diclofenac becoming available without prescription in  
316 that year. Diclofenac use was associated with fewer adverse outcomes but showed  
317 increased risk of neural tube defects and hypospadias in male neonates.

318 Furthermore, and surprisingly, exposure to diclofenac only was associated with  
319 significant decrease in the incidence of stillbirth. The reasons for such differences  
320 between the changes in neonatal outcomes following diclofenac consumption  
321 compared with those following use of the other NSAIDS are not clear. The proportion  
322 of women using diclofenac, especially in the last 7 years of our study makes it highly  
323 unlikely to be due to an underlying maternal condition and/or other compounds used

1  
2  
3 324 in combination (e.g. prescriptions) by women taking diclofenac. It is possible that the  
4  
5 325 drug could act directly on fetal development then this difference could also be due to  
6  
7 326 structural and/or mechanistic differences of the compound compared to the other  
8  
9  
10 327 drugs. However, not enough is known about the specific mechanisms of action of the  
11  
12 328 different analgesics studied to conclude further. Overall, comparing our main  
13  
14 329 analysis with all three sub-analyses, it is evident that the most significant differences  
15  
16 330 were observed when paracetamol was taken with at least one other analgesic. This  
17  
18 331 is mostly due to the high number of pregnancies where paracetamol was used,  
19  
20 332 comprising almost 55% of the exposed cases in the main analysis.  
21  
22  
23  
24  
25  
26  
27  
28  
29

### 334 **Strengths and Limitations**

30 335 A major strength of the present study is the large cohort of 151,141 pregnancies over  
31  
32 336 a 30-year study period from 1985 until 2015, using a robust data source AMND. This  
33  
34 337 is one of the largest cohorts used in studies examining the effects of analgesic use  
35  
36 338 during pregnancy. The dataset contains high quality and consistent data from the  
37  
38 339 geographically defined area of Aberdeen and surrounding district, in the North East  
39  
40 340 of Scotland, UK. In addition, as Aberdeen Maternity Hospital is the only maternity  
41  
42 341 hospital serving the area, over 95% of pregnancies in the area are included in the  
43  
44 342 dataset, considerably minimizing the risk for selection bias. We were able to analyse  
45  
46 343 maternal consumption data of the five most commonly used analgesics available  
47  
48 344 over-the-counter in the UK and most countries, which is not matched in the current  
49  
50 345 literature. The nature of our data allowed for the analysis of analgesics consumed  
51  
52 346 alone or in combination, unlike most existing studies, and this gives our study the  
53  
54 347 added strength of better reflecting real-life consumption patterns<sup>26,27</sup>. We were able  
55  
56  
57  
58  
59  
60

1  
2  
3 348 to adjust for important confounding factors, relevant to each analysed outcome.  
4

5 349 Adjustment for maternal deprivation also allowed us to further account for potential  
6  
7  
8 350 unmeasured factors that can influence maternal and neonatal health, which is a  
9  
10 351 major strength of our analysis compared to most studies.  
11

12  
13 352 A potential concern was that women were probably using analgesics to treat some  
14  
15 353 inherent medical condition which in turn could have been the mediating factor for  
16  
17 354 adverse outcomes. However, since these medications are widely available without  
18  
19  
20 355 prescription, this is unlikely to be a factor that affects the findings of this study. This  
21  
22 356 is especially the case during the “diclofenac analysis” covering 2005-2015, where  
23  
24  
25 357 this study presents results on multiple neonatal outcomes for the given cohort. In this  
26  
27 358 way we offer a comprehensive approach to the exploration of associations with *in*  
28  
29 359 *utero* analgesic exposure rather than only focusing on a single outcome of interest.  
30  
31  
32 360 Our data were based on medical notes; however, over-the-counter consumption is  
33  
34 361 self-reported, and details on the timing, dosage, product type (single-ingredient vs  
35  
36 362 combination) and administration type were not available in the database. Complete  
37  
38 363 case analyses were performed ignoring pregnancies with missing data in the  
39  
40  
41 364 covariates, however due to the low number of missing data there is little chance that  
42  
43 365 this might have affected the validity of our results. Compared to our cohort size,  
44  
45 366 there were, overall, very few cases of cryptorchidism, neural tube defects, amniotic  
46  
47 367 band defects, hypospadias and gastroschisis, resulting in potentially underpowered  
48  
49  
50 368 statistical analyses to detect a difference for these outcomes. Our study only  
51  
52 369 considered neonatal health outcomes and follow-up of the offspring was not  
53  
54 370 available at this time.  
55  
56  
57

58 371  
59  
60

## 372 Interpretation

373 Previous literature has considered fewer outcomes with fewer analgesic  
374 combinations compared to our study. Consistent with our results, increased risk of  
375 preterm birth and miscarriage has been associated with analgesic consumption  
376 during pregnancy<sup>28-31</sup>, while others reported no associations with miscarriage,  
377 stillbirth or preterm delivery<sup>20,28,29,32</sup>. Similarly, increased risk for offspring  
378 cryptorchidism, hypospadias, neural tube defects, amniotic band defects and  
379 gastroschisis have been shown by many studies<sup>7-9,33-40</sup>, although, again, a lack of  
380 associations with major birth defects have been reported<sup>13-17,41,42</sup>. Compared to our  
381 analysis, all these studies used a smaller cohort, considered a shorter study time  
382 and there was frequent disagreement with respect to the choices of adjusted  
383 confounding factors. Another difference is that maternal questionnaires/interviews  
384 were frequently the method of choice to evaluate maternal consumption. Some of  
385 the studies reported increased risks for specific pregnancy trimesters which is  
386 something our study could not evaluate. Differences in study design and adjustment  
387 for different confounders might also account for the disagreement of our results that  
388 provide a more accurate assessment. Our study is one of the largest in terms of  
389 cohort size, duration, number of analgesics and range of outcomes included which  
390 might also contribute to differences compared to other studies.

391 The literature currently reports conflicting evidence, limiting our ability for definite  
392 decision-making. Over-the-counter analgesics are recommended to women by  
393 healthcare professionals in order to deal with pregnancy symptoms and other  
394 conditions. Policy-makers have taken a stand on the topic, either being reassuring  
395 about over-the-counter use during pregnancy or recommending caution when  
396 consumption is necessary<sup>43-46</sup>. Different compounds can affect the mother and the

1  
2  
3 397 fetus in a different way, and their combined use might worsen the risk for offspring ill  
4  
5 398 health. This study demonstrates the need for additional research, before the field can  
6  
7  
8 399 be confidently directed towards one direction or the other.  
9

10 400 Whether the associations we report result from flu, fever, rheumatological or  
11  
12 401 inflammatory conditions, and/or combination with other prescribed medications or  
13  
14 402 solely related to over-the-counter analgesics consumption is a matter of further  
15  
16 403 research. Underlying health conditions could well influence the outcomes we see in  
17  
18 404 this study, however, as these could be very different conditions it is biologically  
19  
20 405 unlikely that they are responsible for the effects we observe here. Our study  
21  
22 406 demonstrates an association of maternal over-the-counter analgesic consumption  
23  
24 407 during pregnancy with adverse neonatal offspring outcomes. Future collaborative  
25  
26 408 approaches such as an individual patient data meta-analysis that includes follow-up  
27  
28 409 data on long-term outcomes during childhood and adulthood would significantly  
29  
30 410 inform decision making. Going forward, uncovering the mechanisms of action and off  
31  
32 411 target effects will also provide a solid foundation for the development of pregnancy-  
33  
34 412 safe compounds. Finally, the findings present here suggest that diclofenac is  
35  
36 413 associated with fewer changes in risk for the more frequent adverse outcomes  
37  
38 414 although it is associated more with rarer, but severe, negative outcomes, including  
39  
40 415 neural tube defects. Diclofenac may have a lower risk for the main adverse neonatal  
41  
42 416 outcomes reported for paracetamol. However, it should be noted that our study is not  
43  
44 417 designed to specifically test differences in level of risk between the analgesics  
45  
46 418 included. Therefore, it should be emphasised that this does not mean that the  
47  
48 419 authors are stating that diclofenac is preferable to paracetamol.  
49  
50  
51  
52  
53  
54  
55  
56  
57  
58  
59  
60

1  
2  
3 421 **Conclusions**  
4  
5

6 422 Pain control is currently a therapeutic priority during pregnancy. Our findings of  
7  
8 423 increased risk of adverse health outcomes for the offspring following at least first  
9  
10 424 trimester maternal use of readily available over-the-counter analgesics are crucial to  
11  
12  
13 425 information for the management of pain during pregnancy.  
14  
15

16 426

17  
18  
19 427 **Acknowledgements:** N/A  
20

21  
22 428 **Disclosure of interests:** Professor David Hay is a founder, director and shareholder  
23  
24 429 in Stemnovate Limited. The remaining authors have no interests to disclose.  
25  
26

27 430 **Contribution to Authorship:** AZ, SB and PAF contributed to the conception, design  
28  
29 431 and coordination of the research. EAR provided critical input in the design and  
30  
31  
32 432 planning of statistical analysis. AZ conducted the statistical analysis and prepared  
33  
34 433 the manuscript, figures and tables. AZ, SB, PAF, RTM and DCH substantially  
35  
36 434 contributed to the analysis and interpretation of the work. All authors contributed to  
37  
38  
39 435 critical discussion of intellectual content, development and review/approval of the  
40  
41 436 final manuscript version.  
42  
43

44 437 **Funding:** This work is supported by the Biotechnology and Biological Sciences  
45  
46 438 Research council (BBSRC) funding the lead author under the EASTBIO doctoral  
47  
48 439 training programme and to PAF, the EU Horizon 2020 project FREIA (Grant Number  
49  
50 440 825100). RTM is supported by MRC Centre for Reproductive Health Grant  
51  
52  
53 441 MR/N022556/1. The funders had no role in study design, data collection, data  
54  
55 442 analysis, decision to publish, or manuscript preparation.  
56  
57  
58  
59  
60



1  
2  
3 443 **Ethics Statement:** The AMND dataset used in this study was fully anonymised,  
4  
5 444 therefore there was no requirement for ethical approval. The North of Scotland  
6  
7 445 Research Ethics Service has devolved Caldicott approval to the Chair of the AMND  
8  
9 446 steering committee. Approval to access and analyse data was obtained from the  
10  
11 447 AMND steering Committee (AMND 004/2018).  
12  
13  
14  
15  
16 448

17  
18  
19  
20  
21  
22  
23  
24  
25  
26  
27  
28  
29  
30  
31  
32  
33  
34  
35  
36  
37  
38  
39  
40  
41  
42  
43  
44  
45  
46  
47  
48  
49  
50  
51  
52  
53  
54  
55  
56  
57  
58  
59  
60

For peer review only

449 **References**

- 450 1. Gendron M-P, Martin B, Oraichi D, Berard A. Health care providers' requests  
451 to Teratogen Information Services on medication use during pregnancy and  
452 lactation. *Eur J Clin Pharmacol*. 2009;65(5):523-531.
- 453 2. Mitchell AA, Gilboa SM, Werler MM, Kelley KE, Louik C, Hernández-Díaz S.  
454 Medication use during pregnancy, with particular focus on prescription drugs:  
455 1976-2008. *Am J Obstet Gynecol*. 2011;205(1):51.e1-51.e8.
- 456 3. Werler MM, Mitchell AA, Hernandez-Diaz S, Honein MA. Use of over-the-  
457 counter medications during pregnancy. *Am J Obstet Gynecol*.  
458 2005;193(3):771-777.
- 459 4. Glover DD, Amonkar M, Rybeck BF, Tracy TS. Prescription, over-the-counter,  
460 and herbal medicine use in a rural, obstetric population. *Am J Obstet Gynecol*.  
461 2003;188(4):1039-1045.
- 462 5. Lupattelli A, Spigset O, Twigg MJ, et al. Medication use in pregnancy: A cross-  
463 sectional, multinational web-based study. *BMJ Open*. 2014;4(2).
- 464 6. Zafeiri A, Mitchell RT, Hay DC, Fowler PA. Over-the-counter analgesics during  
465 pregnancy: a comprehensive review of global prevalence and offspring safety.  
466 *Hum Reprod Update*. Published online October 29, 2020.
- 467 7. Lynberg MC, Khoury MJ, Lu X, Cocian T. Maternal flu, fever, and the risk of  
468 neural tube defects: A population-based case-control study. *Am J Epidemiol*.  
469 1994;140(3):244-255.
- 470 8. Werler MM, Louik C, Mitchell AA. Epidemiologic analysis of maternal factors  
471 and amniotic band defects. *Birth Defects Res Part A - Clin Mol Teratol*.

- 1  
2  
3 472 2003;67(1):68-72.  
4  
5  
6 473 9. Snijder CA, Kortenkamp A, Steegers EAP, et al. Intrauterine exposure to mild  
7  
8 474 analgesics during pregnancy and the occurrence of cryptorchidism and  
9  
10 475 hypospadias in the offspring: The Generation R Study. *Hum Reprod*.  
11  
12 476 2012;27(4):1191-1201.  
13  
14  
15  
16 477 10. Lind JN, Tinker SC, Broussard CS, et al. Maternal medication and herbal use  
17  
18 478 and risk for hypospadias: Data from the National Birth Defects Prevention  
19  
20 479 Study, 1997-2007. *Pharmacoepidemiol Drug Saf*. 2013;22(7):783-793.  
21  
22  
23  
24 480 11. Interrante JD, Ailes EC, Lind JN, et al. Risk comparison for prenatal use of  
25  
26 481 analgesics and selected birth defects, National Birth Defects Prevention Study  
27  
28 482 1997–2011. *Ann Epidemiol*. 2017;27(10):645-653.e2.  
29  
30  
31 483 12. Philippat C, Gorgis-Allemand L, Chevrier C, et al. Analgesics during pregnancy  
32  
33 484 and undescended testis. *Epidemiology*. 2011;22(5):747-749.  
34  
35  
36 485 13. Hernandez RK, Werler MM, Romitti P, Sun L, Anderka M. Nonsteroidal  
37  
38 486 antiinflammatory drug use among women and the risk of birth defects. In:  
39  
40 487 *American Journal of Obstetrics and Gynecology*. Vol 206. Mosby Inc.;  
41  
42 488 2012:228.e1-228.e8.  
43  
44  
45  
46 489 14. Cassina M, De Santis M, Cesari E, et al. First trimester diclofenac exposure  
47  
48 490 and pregnancy outcome. *Reprod Toxicol*. 2010;30(3):401-404.  
49  
50  
51 491 15. Padberg S, Tissen-Diabaté T, Dathe K, et al. Safety of diclofenac use during  
52  
53 492 early pregnancy: A prospective observational cohort study. *Reprod Toxicol*.  
54  
55 493 2018;77:122-129.  
56  
57  
58  
59 494 16. van Gelder MMHJ, Roeleveld N, Nordeng H. Exposure to non-steroidal anti-

- 1  
2  
3 495 inflammatory drugs during pregnancy and the risk of selected birth defects: A  
4  
5 496 prospective cohort study. *PLoS One*. 2011;6(7).  
6  
7  
8 497 17. Dathe K, Fietz AK, Pritchard LW, et al. No evidence of adverse pregnancy  
9  
10 498 outcome after exposure to ibuprofen in the first trimester – Evaluation of the  
11  
12 499 national Embryotox cohort. *Reprod Toxicol*. 2018;79:32-38.  
13  
14  
15  
16 500 18. Pariente G, Leibson T, Carls A, Adams-Webber T, Ito S, Koren G. Pregnancy-  
17  
18 501 Associated Changes in Pharmacokinetics: A Systematic Review. Chappell LC,  
19  
20 502 ed. *PLoS Med*. 2016;13(11):e1002160.  
21  
22  
23 503 19. McElhatton PR, Sullivan FM, Volans GN. Paracetamol overdose in pregnancy  
24  
25 504 analysis of the outcomes of 300 cases referred to the teratology information  
26  
27 505 service. *Reprod Toxicol*. 1997;11(1):85-94.  
28  
29  
30  
31 506 20. Kozer E, Costei AM, Boskovic R, Nulman I, Nikfar S, Koren G. Effects of  
32  
33 507 aspirin consumption during pregnancy on pregnancy outcomes: Meta-analysis.  
34  
35 508 *Birth Defects Res Part B - Dev Reprod Toxicol*. 2003;68(1):70-84.  
36  
37  
38  
39 509 21. Nitsche JF, Patil AS, Langman LJ, et al. Transplacental Passage of  
40  
41 510 Acetaminophen in Term Pregnancy. *Am J Perinatol*. 2017;34(6):541-543.  
42  
43  
44 511 22. Ayorinde AA, Wilde K, Lemon J, Campbell D, Bhattacharya S. Data resource  
45  
46 512 profile: The Aberdeen Maternity and Neonatal Databank (AMND). *Int J*  
47  
48 513 *Epidemiol*. 2016;45(2):389-394.  
49  
50  
51 514 23. Campbell D, Hall M, Lemon J, Carr-Hill R, Pritchard C, Samphier M. Clinical  
52  
53 515 birthweight standards for a total population in the 1980s. *BJOG An Int J Obstet*  
54  
55 516 *Gynaecol*. 1993;100(5):436-445.  
56  
57  
58  
59 517 24. Textor J, van der Zander B, Gilthorpe MS, Liśkiewicz M, Ellison GT. Robust

- 1  
2  
3 518 causal inference using directed acyclic graphs: The R package “dagitty.” *Int J*  
4  
5 519 *Epidemiol.* 2016;45(6):1887-1894.  
6  
7  
8 520 25. Royal College of Obstetricians and Gynaecologists. RCOG review clarifies  
9 pain relief options for women during pregnancy and breastfeeding. Published  
10 521 2018. [https://www.rcog.org.uk/en/news/new-rcog-review-clarifies-pain-relief-](https://www.rcog.org.uk/en/news/new-rcog-review-clarifies-pain-relief-options-for-women-during-pregnancy-and-breastfeeding/)  
11 522 [options-for-women-during-pregnancy-and-breastfeeding/](https://www.rcog.org.uk/en/news/new-rcog-review-clarifies-pain-relief-options-for-women-during-pregnancy-and-breastfeeding/)  
12 523  
13  
14  
15 524 26. Sarganas G, Buttery AK, Zhuang W, et al. Prevalence, trends, patterns and  
16 525 associations of analgesic use in Germany. *BMC Pharmacol Toxicol.*  
17 526 2015;16(1).  
18  
19  
20 527 27. Hider-Mlynarz K, Cavalié P, Maison P. Trends in analgesic consumption in  
21 528 France over the last 10 years and comparison of patterns across Europe. *Br J*  
22 529 *Clin Pharmacol.* 2018;84(6):1324-1334.  
23  
24  
25 530 28. Rebordosa C, Kogevinas M, Bech BH, Sørensen HT, Olsen J. Use of  
26 531 acetaminophen during pregnancy and risk of adverse pregnancy outcomes. *Int*  
27 532 *J Epidemiol.* 2009;38(3):706-714.  
28  
29  
30 533 29. Nielsen GL, Sørensen HT, Larsen H, Pedersen L. Risk of adverse birth  
31 534 outcome and miscarriage in pregnant users of non-steroidal anti-inflammatory  
32 535 drugs: Population based observational study and case-control study. *Br Med J.*  
33 536 2001;322(7281):266-270.  
34  
35  
36 537 30. Czeizel AE, Dudá I, Puhó E. Short-term paracetamol therapy during pregnancy  
37 538 and a lower rate of preterm birth. *Paediatr Perinat Epidemiol.* 2005;19(2):106-  
38 539 111.  
39  
40  
41 540 31. Li Z, Ren A, Liu J, et al. Maternal flu or fever, medication use, and neural tube  
42  
43  
44  
45  
46  
47  
48  
49  
50  
51  
52  
53  
54  
55  
56  
57  
58  
59  
60

- 1  
2  
3 541 defects: A population-based case-control study in northern China. *Birth*  
4  
5 542 *Defects Res Part A - Clin Mol Teratol.* 2007;79(4):295-300.  
6  
7  
8 543 32. Pastore LM, Hertz-Picciotto I, Beaumont JJ. Risk of stillbirth from medications,  
9  
10 544 illnesses and medical procedures. *Paediatr Perinat Epidemiol.* 1999;13(4):421-  
11  
12 545 430.  
13  
14  
15 546 33. Kozer E, Nikfar S, Costei A, Boskovic R, Nulman I, Koren G. Aspirin  
16  
17 547 consumption during the first trimester of pregnancy and congenital anomalies:  
18  
19 548 A meta-analysis. *Am J Obstet Gynecol.* 2002;187(6):1623-1630.  
20  
21  
22 549 34. Kristensen DM, Hass U, Lesn L, et al. Intrauterine exposure to mild analgesics  
23  
24 550 is a risk factor for development of male reproductive disorders in human and  
25  
26 551 rat. *Hum Reprod.* 2011;26(1):235-244.  
27  
28  
29 552 35. Jensen MS, Rebordosa C, Thulstrup AM, et al. Maternal use of  
30  
31 553 acetaminophen, ibuprofen, and acetylsalicylic acid during pregnancy and risk  
32  
33 554 of cryptorchidism. *Epidemiology.* 2010;21(6):779-785.  
34  
35  
36 555 36. Correy JF, Newman NM, Collins JA, Burrows EA, Burrows RF, Curran JT. Use  
37  
38 556 of prescription drugs in the first trimester and congenital malformations. *Aust N*  
39  
40 557 *Z J Obs Gynaecol.* 1991;31(4):340-344.  
41  
42  
43 558 37. Lind DV, Main KM, Kyhl HB, et al. Maternal use of mild analgesics during  
44  
45 559 pregnancy associated with reduced anogenital distance in sons: A cohort  
46  
47 560 study of 1027 mother-child pairs. *Hum Reprod.* 2017;32(1):223-231.  
48  
49  
50 561 38. Werler MM, Mitchell AA, Shapiro S. First trimester maternal medication use in  
51  
52 562 relation to gastroschisis. *Teratology.* 1992;45(4):361-367.  
53  
54  
55 563 39. Torfs CP, Katz EA, Bateson TF, Lam PK, Curry CJR. Maternal medications  
56  
57  
58  
59  
60

- 1  
2  
3 564 and environmental exposures as risk factors for gastroschisis. *Teratology*.  
4  
5 565 1996;54(2):84-92.  
6  
7  
8 566 40. M. Werler M, Sheehan JE, Mitchell AA. Maternal medication use and risks of  
9  
10 567 gastroschisis and small intestinal atresia. *Am J Epidemiol*. 2002;155(1):26-31.  
11  
12  
13 568 41. Slone D, Heinonen OP, Kaufman DW, Siskind V, Monson RR, Shapiro S.  
14  
15 569 ASPIRIN AND CONGENITAL MALFORMATIONS. *Lancet*.  
16  
17 570 1976;307(7974):1373-1375.  
18  
19  
20  
21 571 42. Shaw GM, Todoroff K, Velie EM, Lammer EJ. Maternal illness, including fever,  
22  
23 572 and medication use as risk factors for neural tube defects. *Teratology*.  
24  
25 573 1998;57(1):1-7.  
26  
27  
28  
29 574 43. Mosley II JF, Smith LL, Dezan MD. An overview of upcoming changes in  
30  
31 575 pregnancy and lactation labeling information. *Pharm Pract (Granada)*.  
32  
33 576 2015;13(2):605.  
34  
35  
36 577 44. SMFM (Society for Maternal-Fetal Medicine Publications Committee). Prenatal  
37  
38 578 acetaminophen use and outcomes in children. *Am J Obstet Gynecol*.  
39  
40 579 2017;216(3):B14-B15.  
41  
42  
43  
44 580 45. Bisson DL, Newell SD, Laxton C. Antenatal and Postnatal Analgesia: Scientific  
45  
46 581 Impact Paper No. 59. *BJOG An Int J Obstet Gynaecol*. 2018;(59).  
47  
48  
49 582 46. RCOG. RCOG review clarifies pain relief options for women during pregnancy  
50  
51 583 and breastfeeding. Published 2018. [https://www.rcog.org.uk/en/news/new-](https://www.rcog.org.uk/en/news/new-rcog-review-clarifies-pain-relief-options-for-women-during-pregnancy-and-breastfeeding/)  
52  
53 584 [rcog-review-clarifies-pain-relief-options-for-women-during-pregnancy-and-](https://www.rcog.org.uk/en/news/new-rcog-review-clarifies-pain-relief-options-for-women-during-pregnancy-and-breastfeeding/)  
54  
55 585 [breastfeeding/](https://www.rcog.org.uk/en/news/new-rcog-review-clarifies-pain-relief-options-for-women-during-pregnancy-and-breastfeeding/)  
56  
57  
58  
59  
60

**Table 1.** Comparison of baseline characteristics between exposed (use of analgesics) and unexposed (no analgesic use) groups of pregnancies (P values <0.05 shown in bold).

| Baseline Characteristics        | No analgesic (n=107,143) n (%) | At least one analgesic (n=43,998) n (%) | P value†         | Paracetamol (n=24,099) n (%) | P value†         | Ibuprofen/ Aspirin/ Naproxen (n=762) n (%) | P value†         | No analgesic 2005-2015 (n=20,544) n (%) | Diclofenac 2005-2015 (n=10,291) n (%) | P value‡         |
|---------------------------------|--------------------------------|-----------------------------------------|------------------|------------------------------|------------------|--------------------------------------------|------------------|-----------------------------------------|---------------------------------------|------------------|
| <b>Year of delivery</b>         |                                |                                         |                  |                              |                  |                                            |                  |                                         |                                       |                  |
| 1985-1994                       | 50,152 (46.8)                  | 5,737 (13.0)                            | <b>&lt;0.001</b> | 5,390 (22.4)                 | <b>&lt;0.001</b> | 213 (28.0)                                 | <b>&lt;0.001</b> | n/a                                     | n/a                                   | <b>&lt;0.001</b> |
| 1995-2004                       | 36,447 (34.0)                  | 7,263 (16.5)                            |                  | 6,571 (27.3)                 |                  | 321 (42.1)                                 |                  | n/a                                     | n/a                                   |                  |
| 2005-2015 / 2005-2009 *         | 20,544 (19.2)                  | 30,998 (70.5)                           |                  | 12,138 (50.4)                |                  | 228 (29.9)                                 |                  | n/a                                     | n/a                                   |                  |
| 2010-2015 *                     | n/a                            | n/a                                     |                  | n/a                          |                  | n/a                                        |                  | 11,105 (54.1)                           | 4,021 (39.1)                          |                  |
|                                 | n/a                            | n/a                                     |                  | n/a                          |                  | n/a                                        |                  | 9,439 (45.9)                            | 6,270 (60.9)                          |                  |
| <b>Maternal age at delivery</b> |                                |                                         |                  |                              |                  |                                            |                  |                                         |                                       |                  |
| Younger than 20                 | 9,236 (8.6)                    | 3,834 (8.7)                             | <b>&lt;0.001</b> | 2,936 (12.2)                 | <b>&lt;0.001</b> | 34 (4.5)                                   | <b>&lt;0.001</b> | 1,286 (6.3)                             | 311 (3.0)                             | <b>&lt;0.001</b> |
| 20-25                           | 24,249 (22.6)                  | 8,700 (19.8)                            |                  | 5,932 (24.6)                 |                  | 113 (14.8)                                 |                  | 3,436 (16.7)                            | 1,152 (11.2)                          |                  |
| 26-35                           | 63,499 (59.3)                  | 25,367 (57.7)                           |                  | 12,896 (53.5)                |                  | 464 (60.9)                                 |                  | 12,664 (61.1)                           | 6,628 (64.4)                          |                  |
| Older than 35                   | 10,159 (9.5)                   | 6,097 (13.9)                            |                  | 2,335 (9.7)                  |                  | 151 (19.8)                                 |                  | 3,158 (15.4)                            | 2,200 (21.4)                          |                  |
|                                 |                                |                                         |                  |                              |                  |                                            |                  |                                         |                                       |                  |
| <b>Previous Parity</b>          |                                |                                         |                  |                              |                  |                                            |                  |                                         |                                       |                  |
| Nulliparity (0)                 | 48,684 (45.4)                  | 23,353 (53.1)                           | <b>&lt;0.001</b> | 12,510 (51.9)                | <b>&lt;0.001</b> | 300 (39.4)                                 | <b>0.004</b>     | 8,336 (40.6)                            | 5,004 (48.6)                          | <b>&lt;0.001</b> |
| Multiparity (1-11)              | 58,457 (54.6)                  | 20,639 (46.9)                           |                  | 11,587 (48.1)                |                  | 462 (60.6)                                 |                  | 12,206 (59.4)                           | 5,284 (51.4)                          |                  |
| Missing                         | 2 (<0.1)§                      | 6 (<0.1)§                               |                  | 2 (<0.1)§                    |                  | 0 (0.0)§                                   |                  | 2 (<0.1)§                               | 3 (<0.1)§                             |                  |
| <b>Maternal BMI</b>             |                                |                                         |                  |                              |                  |                                            |                  |                                         |                                       |                  |
| Underweight (<18.5)             | 1,998 (2.4)                    | 869 (2.2)                               | <b>&lt;0.001</b> | 545 (2.6)                    | <b>&lt;0.001</b> | 10 (1.5)                                   | <b>0.007</b>     | 492 (2.7)                               | 174 (1.9)                             | <b>&lt;0.001</b> |
| Normal weight (18.5-24.9)       | 50,127 (60.8)                  | 18,958 (48.8)                           |                  | 10,486 (50.5)                |                  | 361 (55.)                                  |                  | 10,239 (55.2)                           | 4,671 (50.0)                          |                  |
| Overweight (25.0-29.9)          | 20,500 (24.9)                  | 10,960 (28.2)                           |                  | 5,733 (27.6)                 |                  | 192 (29.5)                                 |                  | 4,930 (26.6)                            | 2,630 (28.1)                          |                  |
| Obese (< 30.0)                  | 9,773 (11.9)                   | 8,046 (20.7)                            |                  | 3,995 (19.2)                 |                  | 88 (13.5)                                  |                  | 2,881 (15.5)                            | 1,871 (20.0)                          |                  |
| Missing data                    | 24,745 (23.1)§                 | 5,165 (11.7)§                           |                  | 3,340 (13.9)§                |                  | 111 (14.6)§                                |                  | 2,002 (9.7)§                            | 945 (9.2)§                            |                  |
|                                 |                                |                                         |                  |                              |                  |                                            |                  |                                         |                                       |                  |



| <b>Gestation weeks at earliest antenatal visit</b> |               |               |                  |               |                  |            |                  |               |              |                  |
|----------------------------------------------------|---------------|---------------|------------------|---------------|------------------|------------|------------------|---------------|--------------|------------------|
| 1 <sup>st</sup> Trimester                          | 69,896 (65.4) | 36,789 (83.7) | <b>&lt;0.001</b> | 19,075 (79.2) | <b>&lt;0.001</b> | 569 (75.0) | <b>&lt;0.001</b> | 18,155 (88.4) | 9,185 (89.4) | <b>0.036</b>     |
| 2 <sup>nd</sup> Trimester                          | 29,269 (27.4) | 5,791 (13.2)  |                  | 4,117 (17.1)  |                  | 166 (21.9) |                  | 1,770 (8.6)   | 829 (8.1)    |                  |
| 3 <sup>rd</sup> Trimester                          | 7,741 (7.2)   | 1,376 (3.1)   |                  | 890 (3.7)     |                  | 24 (3.2)   |                  | 605 (2.9)     | 264 (2.6)    |                  |
| Missing                                            | 237 (0.2)§    | 42 (0.1)§     |                  | 17 (0.1)§     |                  | 3 (0.4)§   |                  | 14 (0.1)§     | 13 (0.1)§    |                  |
| <b>Maternal smoking Status</b>                     |               |               |                  |               |                  |            |                  |               |              |                  |
| Unknown                                            | 6,505 (6.1)§  | 819 (1.9)§    | <b>&lt;0.001</b> | 500 (2.1)§    | <b>&lt;0.001</b> | 32 (4.2)§  | 0.132            | 448 (2.2)§    | 155 (1.5)§   | <b>&lt;0.001</b> |
| Ex-smoker                                          | 5,952 (5.6)   | 3,363 (7.6)   |                  | 1,923 (8.1)   |                  | 35 (4.8)   |                  | 1,427 (7.1)   | 660 (6.5)    |                  |
| Non-smoker                                         | 70,319 (69.9) | 31,421 (72.8) |                  | 15,755 (66.8) |                  | 534 (73.2) |                  | 15,525 (77.3) | 8,368 (82.6) |                  |
| Smoker                                             | 24,367 (24.2) | 8,395 (19.4)  |                  | 5,921 (25.1)  |                  | 161 (22.2) |                  | 3,144 (15.6)  | 1,108 (10.9) |                  |
| <b>Maternal SIMD Decile</b>                        |               |               |                  |               |                  |            |                  |               |              |                  |
| Least Deprived (7-10)                              | 65,227 (61.8) | 25,192 (57.9) | <b>&lt;0.001</b> | 12,807 (53.8) | <b>&lt;0.001</b> | 501 (66.3) | <b>0.012</b>     | 12,806 (62.9) | 6,714 (66.1) | <b>&lt;0.001</b> |
| Most Deprived (1-6)                                | 40,321 (38.2) | 18,289 (42.1) |                  | 11,017 (46.2) |                  | 255 (33.7) |                  | 7,564 (37.1)  | 3,442 (33.9) |                  |
| Missing                                            | 1,595 (1.5)§  | 517 (1.2)§    |                  | 275 (1.1)§    |                  | 6 (0.8)§   |                  | 174 (0.8)§    | 135 (1.3)§   |                  |
| <b>Maternal hypertensive disorders</b>             |               |               |                  |               |                  |            |                  |               |              |                  |
| None                                               | 91,276 (85.2) | 35,529 (80.8) | <b>&lt;0.001</b> | 18,635 (77.3) | <b>&lt;0.001</b> | 636 (83.5) | <b>0.001</b>     | 18,851 (91.8) | 9,273 (90.1) | <b>&lt;0.001</b> |
| Gestational Hypertension                           | 13,029 (12.2) | 5,501 (12.5)  |                  | 3,584 (14.9)  |                  | 88 (11.5)  |                  | 1,165 (5.7)   | 690 (6.7)    |                  |
| Preeclampsia                                       | 2,780 (2.6)   | 2,941 (6.7)   |                  | 1,861 (7.7)   |                  | 38 (5.0)   |                  | 523 (2.5)     | 324 (3.1)    |                  |
| Eclampsia                                          | 58 (0.1)      | 27 (0.1)      |                  | 19 (0.1)      |                  | 0 (0.0)    |                  | 5 (<0.1)      | 4 (<0.1)     |                  |
| <b>Maternal antepartum haemorrhage</b>             |               |               |                  |               |                  |            |                  |               |              |                  |
| No haemorrhage                                     | 97,527 (91.0) | 37,673 (85.6) | <b>&lt;0.001</b> | 20,306 (84.3) | <b>&lt;0.001</b> | 684 (89.8) | 0.434            | 18,549 (90.3) | 9,244 (89.8) | <b>&lt;0.001</b> |
| Abruption                                          | 697 (0.7)     | 468 (1.1)     |                  | 221 (0.9)     |                  | 8 (1.0)    |                  | 103 (0.5)     | 106 (1.0)    |                  |
| Placenta previa                                    | 308 (0.3)     | 368 (0.8)     |                  | 152 (0.6)     |                  | 2 (0.3)    |                  | 23 (0.1)      | 114 (1.1)    |                  |
| Unspecified                                        | 8,611 (8.0)   | 5,489 (12.5)  |                  | 3,420 (14.2)  |                  | 68 (8.9)   |                  | 1,869 (9.1)   | 827 (8.0)    |                  |
| <b>Type of labour</b>                              |               |               |                  |               |                  |            |                  |               |              |                  |
| Elective Caesarean Section                         | 5,967 (5.6)   | 6,925 (15.7)  | <b>&lt;0.001</b> | 1,384 (5.7)   | <b>&lt;0.001</b> | 67 (8.8)   | <b>&lt;0.001</b> | 616 (3.0)     | 3,843 (37.3) | <b>&lt;0.001</b> |
| Induced                                            | 24,120 (22.5) | 16,276 (37.0) |                  | 10,067 (41.8) |                  | 228 (29.9) |                  | 3,895 (19.0)  | 1,998 (19.4) |                  |
| Spontaneous                                        | 77,056 (71.9) | 20,797 (47.3) |                  | 12,648 (52.5) |                  | 467 (61.3) |                  | 16,033 (78.0) | 4,450 (43.2) |                  |

| <b>Type of delivery</b>              |                |               |                  |               |                  |            |                  |               |              |                  |
|--------------------------------------|----------------|---------------|------------------|---------------|------------------|------------|------------------|---------------|--------------|------------------|
| Spontaneous vaginal delivery (SVD)   | 75,027 (70.1)  | 19,287 (43.8) | <b>&lt;0.001</b> | 15,983 (66.3) | <b>&lt;0.001</b> | 496 (65.2) | <b>0.003</b>     | 16,398 (79.8) | 1,403 (13.6) | <b>&lt;0.001</b> |
| Instrumental                         | 15,409 (14.4)  | 8,107 (18.4)  |                  | 4,043 (16.8)  |                  | 120 (15.8) |                  | 2,546 (12.4)  | 1,927 (18.7) |                  |
| Caesarean Section                    | 15,566 (14.5)  | 16,351 (37.2) |                  | 3,879 (16.1)  |                  | 141 (18.5) |                  | 1,509 (7.3)   | 6,937 (67.4) |                  |
| Other                                | 1,096 (1.0)    | 247 (0.6)     |                  | 191 (0.8)     |                  | 4 (0.5)    |                  | 89 (0.4)      | 24 (0.2)     |                  |
| Missing                              | 45 (<0.1)§     | 6 (<0.1)§     |                  | 3 (<0.1)§     |                  | 1 (0.1)§   |                  | 2 (<0.1)§     | 0 (0.0)§     |                  |
| <b>Analgesia during labour</b>       |                |               |                  |               |                  |            |                  |               |              |                  |
| No                                   | 105,176 (98.2) | 36,117 (82.1) | <b>&lt;0.001</b> | 20,974 (87.0) | <b>&lt;0.001</b> | 729 (95.7) | <b>&lt;0.001</b> | 19,915 (96.9) | 8,235 (80.0) | <b>&lt;0.001</b> |
| Yes                                  | 1,967 (1.8)    | 7,881 (17.9)  |                  | 3,125 (13.0)  |                  | 33 (4.3)   |                  | 629 (3.1)     | 2,056 (20.0) |                  |
| <b>Baby presentation at delivery</b> |                |               |                  |               |                  |            |                  |               |              |                  |
| Occiput anterior                     | 11,571 (10.8)  | 8,152 (18.6)  | <b>&lt;0.001</b> | 2,636 (11.0)  | 0.525            | 68 (8.9)   | 0.093            | 1,401 (6.8)   | 2,967 (28.9) | <b>&lt;0.001</b> |
| Occiput posterior                    | 95,352 (89.2)  | 35,745 (81.4) |                  | 21,409 (89.0) |                  | 694 (91.1) |                  | 19,100 (93.2) | 7,306 (71.1) |                  |
| Missing                              | 220 (0.2)§     | 101 (0.2)§    |                  | 54 (0.2)§     |                  | 0 (0.0)§   |                  | 43 (0.2)§     | 18 (0.2)§    |                  |
| <b>Sex of baby</b>                   |                |               |                  |               |                  |            |                  |               |              |                  |
| Female                               | 52,265 (48.8)  | 21,139 (48.0) | <b>0.010</b>     | 11,739 (48.7) | 0.861            | 367 (48.2) | 0.732            | 10,124 (49.3) | 4,907 (47.7) | <b>0.008</b>     |
| Male                                 | 54,866 (51.2)  | 22,852 (51.9) |                  | 12,354 (51.3) |                  | 395 (51.8) |                  | 10,417 (50.7) | 5,384 (52.3) |                  |
| Missing                              | 12 (<0.1)§     | 7 (<0.1)§     |                  | 6 (<0.1)§     |                  | 0 (0.0)§   |                  | 3 (<0.1)§     | 0 (0.0)§     |                  |

587 n/a, not applicable; n, number of pregnancies

588 \*Only applicable to Diclofenac 2005-2015 analysis

589 †p value in comparison to the first ("No analgesic") column

590 ‡p value in comparison to "No analgesic 2005-2015" control column

591 §Percentage of missing data on total, not included in the analysis

**Table 2.** Regression analysis of offspring outcomes between control (no analgesic) and groups exposed to at least one analgesic, only paracetamol, and at least one from ibuprofen, aspirin, naproxen.

| Outcomes                                    | No analgesic<br>(n=107,143)<br>n (%) | At least one<br>analgesic<br>(n=43,998)<br>n (%) | Crude<br>OR (CI 95%)    | Adjusted<br>OR (95% CI)                | Paracetamol<br>(n=24,099)<br>n (%) | Crude<br>OR (95% CI)          | Adjusted<br>OR (95% CI)                  | Ibu/Asp/Na<br>pr<br>(n=762)<br>n (%) | Crude<br>OR (95% CI)        | Adjusted<br>OR (95% CI)                 |
|---------------------------------------------|--------------------------------------|--------------------------------------------------|-------------------------|----------------------------------------|------------------------------------|-------------------------------|------------------------------------------|--------------------------------------|-----------------------------|-----------------------------------------|
| <b>Gestation at delivery (weeks)</b>        |                                      |                                                  |                         |                                        |                                    |                               |                                          |                                      |                             |                                         |
| >=37                                        | 100,879 (94.2)                       | 39,838 (90.5)                                    | 1.00                    | 1.00                                   | 21,589 (89.6)                      | 1.00                          | 1.00                                     | 697 (91.5)                           | 1.00                        | 1.00                                    |
| <37                                         | 6,264 (5.8)                          | 4,160 (9.5)                                      | <b>1.68 (1.61-1.75)</b> | <b>1.50 (1.43-1.58)<sup>a</sup></b>    | 2,510 (10.4)                       | <b>1.87 (1.78-1.97)</b>       | <b>1.56 (1.48-1.65)<sup>a</sup></b>      | 65 (8.5)                             | <b>1.50 (1.16-1.94)</b>     | <b>1.42 (1.08-1.86)<sup>a</sup></b>     |
| <b>Pregnancy outcome</b>                    |                                      |                                                  |                         |                                        |                                    |                               |                                          |                                      |                             |                                         |
| Livebirth                                   | 105,949 (98.9)                       | 43,407 (98.7)                                    | 1.00                    | 1.00                                   | 23,704 (98.4)                      | 1.00                          | 1.00                                     | 747 (98.0)                           | 1.00                        | 1.00                                    |
| Stillbirth                                  | 803 (0.7)                            | 405 (0.9)                                        | <b>1.23 (1.09-1.39)</b> | <b>1.33 (1.15-1.54)<sup>a</sup></b>    | 275 (1.1)                          | <b>1.53 (1.33-1.76)</b>       | <b>1.52 (1.30-1.77)<sup>a</sup></b>      | 13 (1.7)                             | <b>2.30 (1.32-3.99)</b>     | <b>2.34 (1.29-4.25)<sup>a</sup></b>     |
| Neonatal<br>Death                           | 373 (0.3)                            | 182 (0.4)                                        | 1.19 (0.99-1.42)        | <b>1.56 (1.27-1.93)<sup>a</sup></b>    | 117 (0.5)                          | <b>1.40 (1.14-1.73)</b>       | <b>1.56 (1.24-1.96)<sup>a</sup></b>      | 2 (0.3)                              | 0.76 (0.19-3.06)            | 0.93 (0.23-3.74) <sup>a</sup>           |
| Missing                                     | 18 (<0.1)                            | 4 (<0.1)                                         | n/a                     | n/a                                    | 3 (<0.1)                           | n/a                           | n/a                                      | 0 (0.0)                              | n/a                         | n/a                                     |
| <b>Weight of baby (grams)</b>               |                                      |                                                  |                         |                                        |                                    |                               |                                          |                                      |                             |                                         |
| NBW                                         | 87,966 (82.1)                        | 34,555 (78.6)                                    | 1.00                    | 1.00                                   | 19,163 (79.5)                      | 1.00                          | 1.00                                     | 605 (79.5)                           | 1.00                        | 1.00                                    |
| LBW                                         | 5,910 (5.5)                          | 3,571 (8.1)                                      | <b>1.54 (1.47-1.61)</b> | <b>1.28 (1.20-1.37)<sup>b</sup></b>    | 2,213 (9.2)                        | <b>1.72 (1.63-1.81)</b>       | <b>1.60 (1.51-1.69)<sup>b</sup></b>      | 59 (7.7)                             | <b>1.45 (1.11-1.90)</b>     | 1.29 (0.91-1.83) <sup>b</sup>           |
| HBW                                         | 13,233 (12.4)                        | 5,863 (13.3)                                     | <b>1.13 (1.09-1.17)</b> | <b>1.09 (1.05-1.13)<sup>b</sup></b>    | 2,720 (11.3)                       | <b>0.94 (0.90-0.99)</b>       | 0.98 (0.93-1.02) <sup>b</sup>            | 97 (12.7)                            | 1.07 (0.86-1.32)            | 0.99 (0.80-1.24) <sup>b</sup>           |
| Missing                                     | 34 (<0.1)                            | 9 (<0.1)                                         | n/a                     | n/a                                    | 3 (<0.1)                           | n/a                           | n/a                                      | 1 (0.1)                              | n/a                         | n/a                                     |
| <b>Standardised Birthweight Score</b>       |                                      |                                                  |                         |                                        |                                    |                               |                                          |                                      |                             |                                         |
| Mean (SD)                                   | 0.001 (0.003)                        | -0.002 (0.065)                                   | <b>0.03 (0.02-0.04)</b> | <b>0.046 (0.032-0.059)<sup>c</sup></b> | 0.001 (0.991)                      | <b>-0.04 (-0.058- -0.029)</b> | <b>-0.014 (-0.029-0.001)<sup>c</sup></b> | 0.046 (0.038)                        | <b>0.045 (-0.029-0.119)</b> | <b>0.049 (-0.025-0.123)<sup>c</sup></b> |
| <b>Admitted to neonatal unit</b>            |                                      |                                                  |                         |                                        |                                    |                               |                                          |                                      |                             |                                         |
| No                                          | 62,378 (58.2)                        | 32,391 (73.6)                                    | 1.00                    | 1.00                                   | 16,342 (67.8)                      | 1.00                          | 1.00                                     | 480 (63.0)                           | 1.00                        | 1.00                                    |
| Yes                                         | 11,011 (10.3)                        | 7,448 (16.9)                                     | <b>1.30 (1.26-1.35)</b> | <b>1.57 (1.51-1.64)<sup>b</sup></b>    | 3,956 (16.4)                       | <b>1.37 (1.32-1.43)</b>       | <b>1.45 (1.38-1.53)<sup>b</sup></b>      | 117 (15.4)                           | <b>1.38 (1.13-1.69)</b>     | <b>1.54 (1.22-1.94)<sup>b</sup></b>     |
| Missing                                     | 33,754 (31.5)                        | 4,159 (9.5)                                      | n/a                     | n/a                                    | 3,801 (15.8)                       | n/a                           | n/a                                      | 762 (21.7)                           | n/a                         | n/a                                     |
| <b>APGAR score at 1 min</b>                 |                                      |                                                  |                         |                                        |                                    |                               |                                          |                                      |                             |                                         |
| Normal                                      | 92,217 (86.1)                        | 38,224 (86.9)                                    | 1.00                    | 1.00                                   | 20,593 (85.5)                      | 1.00                          | 1.00                                     | 659 (86.5)                           | 1.00                        | 1.00                                    |
| <7                                          | 14,335 (13.4)                        | 5,674 (12.9)                                     | <b>0.96 (0.92-0.99)</b> | <b>1.18 (1.13-1.23)<sup>d</sup></b>    | 3,437(14.3)                        | <b>1.07 (1.03-1.12)</b>       | <b>1.23 (1.18-1.28)<sup>d</sup></b>      | 101 (13.3)                           | 0.99 (0.80-1.22)            | 1.07 (0.86-1.32) <sup>d</sup>           |
| Missing                                     | 591 (0.6)                            | 100 (0.2)                                        | n/a                     | n/a                                    | 69 (0.3)                           | n/a                           | n/a                                      | 2 (0.3)                              | n/a                         | n/a                                     |
| <b>APGAR score at 5 min</b>                 |                                      |                                                  |                         |                                        |                                    |                               |                                          |                                      |                             |                                         |
| Normal                                      | 104,292 (97.3)                       | 42,730 (97.1)                                    | 1.00                    | 1.00                                   | 23,334 (96.8)                      | 1.00                          | 1.00                                     | 738 (96.9)                           | 1.00                        | 1.00                                    |
| <7                                          | 2,216 (2.1)                          | 1,163 (2.6)                                      | <b>1.28 (1.19-1.38)</b> | <b>1.48 (1.35-1.62)<sup>d</sup></b>    | 690 (2.9)                          | <b>1.39 (1.28-1.52)</b>       | <b>1.53 (1.40-1.68)<sup>d</sup></b>      | 21 (2.8)                             | 1.34 (0.87-2.07)            | 1.52 (0.97-2.36) <sup>d</sup>           |
| Missing                                     | 635 (0.6)                            | 105 (0.2)                                        | n/a                     | n/a                                    | 75 (0.3)                           | n/a                           | n/a                                      | 3 (0.4)                              | n/a                         | n/a                                     |
| <b>Cryptorchidism (only males included)</b> |                                      |                                                  |                         |                                        |                                    |                               |                                          |                                      |                             |                                         |
| No                                          | 54,509 (99.3)                        | 22,616 (99.0)                                    | 1.00                    | 1.00                                   | 12,247 (99.1)                      | 1.00                          | 1.00                                     | 394 (99.4)                           | 1.00                        | 1.00                                    |
| Yes                                         | 357 (0.7)                            | 236 (1.0)                                        | <b>1.59 (1.35-1.88)</b> | 0.92 (0.77-1.11) <sup>b</sup>          | 107 (0.9)                          | <b>1.33 (1.07-1.66)</b>       | 0.87 (0.69-1.09) <sup>b</sup>            | 1 (0.3)                              | 0.39 (0.05-2.77)            | 0.28 (0.04-1.98) <sup>b</sup>           |
| <b>Neural Tube Defects</b>                  |                                      |                                                  |                         |                                        |                                    |                               |                                          |                                      |                             |                                         |

|                                          |                 |                |                         |                                     |                |                         |                               |             |                         |                               |
|------------------------------------------|-----------------|----------------|-------------------------|-------------------------------------|----------------|-------------------------|-------------------------------|-------------|-------------------------|-------------------------------|
| No                                       | 107,093 (99.9)  | 43,928 (99.8)  | 1.00                    | 1.00                                | 24,077 (99.9)  | 1.00                    | 1.00                          | 762 (100)   | 1.00                    | 1.00                          |
| Yes                                      | 50 (0.1)        | 70 (0.2)       | <b>3.41 (2.37-4.91)</b> | <b>1.64 (1.08-2.47)<sup>b</sup></b> | 22 (0.1)       | <b>1.96 (1.19-3.23)</b> | 1.21 (0.71-2.06) <sup>b</sup> | 0 (0.0)     | n/a                     | n/a                           |
| <b>Amniotic Band Defects</b>             |                 |                |                         |                                     |                |                         |                               |             |                         |                               |
| No                                       | 107,053 (99.9)  | 43,936 (99.9)  | 1.00                    | 1.00                                | 24,070 (99.9)  | 1.00                    | 1.00                          | 760 (99.7)  | 1.00                    | 1.00                          |
| Yes                                      | 90 (0.1)        | 62 (0.1)       | <b>1.68 (1.21-2.32)</b> | 1.02 (0.71-1.47) <sup>b</sup>       | 29 (0.1)       | 1.43 (0.94-2.18)        | 0.98 (0.63-1.52) <sup>b</sup> | 2 (0.3)     | 3.13 (0.77-12.73)       | 2.29 (0.56-9.37) <sup>b</sup> |
| <b>Hypospadias (only males included)</b> |                 |                |                         |                                     |                |                         |                               |             |                         |                               |
| No                                       | 54,607 (99.5)   | 22,600 (98.9)  | 1.00                    | 1.00                                | 12,258 (99.2)  | 1.00                    | 1.00                          | 390 (98.7)  | 1.00                    | 1.00                          |
| Yes                                      | 259 (0.3)       | 252 (1.1)      | <b>2.35 (1.98-2.80)</b> | <b>1.27 (1.05-1.54)<sup>b</sup></b> | 96 (0.8)       | <b>1.65 (1.31-2.09)</b> | 1.07 (0.84-1.37) <sup>b</sup> | 5 (1.3)     | <b>2.70 (1.11-6.59)</b> | 1.91 (0.78-4.68) <sup>b</sup> |
| <b>Gastroschisis</b>                     |                 |                |                         |                                     |                |                         |                               |             |                         |                               |
| No                                       | 107,120 (99.9)  | 43,979 (99.9)  | 1.00                    | 1.00                                | 24,089 (99.9)  | 1.00                    | 1.00                          | 762(100)    | 1.00                    | 1.00                          |
| Yes                                      | 23 (0.1)        | 19 (0.1)       | <b>2.01 (1.10-3.70)</b> | 1.10 (0.56-2.20) <sup>b</sup>       | 10 (0.1)       | 1.93 (0.92-4.06)        | 0.99 (0.45-2.21) <sup>b</sup> | 0 (0.0)     | n/a                     | n/a                           |
| <b>At least one outcome*</b>             |                 |                |                         |                                     |                |                         |                               |             |                         |                               |
| No                                       | 106,367 (99.3%) | 43,363 (98.6%) | 1.00                    | 1.00                                | 23,835 (98.9%) | 1.00                    | 1.00                          | 754 (99.0%) | 1.00                    | 1.00                          |
| Yes                                      | 776 (0.7%)      | 635 (1.4%)     | <b>2.01 (1.81-2.23)</b> | 1.12 (0.99-1.26) <sup>b</sup>       | 264 (1.1%)     | <b>1.52 (1.32-1.75)</b> | 0.97 (0.84-1.13) <sup>b</sup> | 8 (1.0%)    | 1.45 (0.72-2.93)        | 1.11 (0.55-2.23) <sup>b</sup> |

592 n/a, not applicable; n, number of pregnancies

593 <sup>a</sup> Adjusted for year of delivery, maternal age at delivery, SIMD, first gestational booking, maternal hypertensive disorders, maternal antepartum

594 haemorrhage

595 <sup>b</sup> Adjusted for year of delivery, maternal age at delivery, SIMD, first gestational booking, gestation at delivery

596 <sup>c</sup> Adjusted for year of delivery, maternal age at delivery, SIMD, first gestational booking

597 <sup>d</sup> Adjusted for year of delivery, maternal age at delivery, SIMD, first gestational booking, type of delivery

598 \*Including cryptorchidism, neural tube defects, amniotic band defects, hypospadias, gastroschisis

**Table 3.** Sub-group regression analysis between control pregnancies and exposed to diclofenac.

| Outcomes                                    | No analgesic<br>(n=20,544)<br>n (%) | Diclofenac<br>2005-2015<br>(n=10,291)<br>n (%) | Crude<br>OR (CI 95%)        | Adjusted<br>OR (CI 95%)                 |
|---------------------------------------------|-------------------------------------|------------------------------------------------|-----------------------------|-----------------------------------------|
| <b>Gestation at delivery (weeks)</b>        |                                     |                                                |                             |                                         |
| ≥37                                         | 19,407 (94.5%)                      | 9,640 (93.7%)                                  | 1.00                        | 1.00                                    |
| <37                                         | 1,137 (5.5%)                        | 651 (6.3%)                                     | <b>1.15 (1.04, 1.27)</b>    | 1.10 (0.99, 1.22) <sup>a</sup>          |
| <b>Pregnancy outcome</b>                    |                                     |                                                |                             |                                         |
| Livebirth                                   | 20,393 (99.3%)                      | 10,227 (99.4%)                                 | 1.00                        | 1.00                                    |
| Stillbirth                                  | 116 (0.5%)                          | 39 (0.4%)                                      | <b>0.67 (0.47, 0.96)</b>    | <b>0.59 (0.41, 0.87)<sup>a</sup></b>    |
| Neonatal Death                              | 35 (0.2%)                           | 25 (0.2%)                                      | 1.42 (0.85, 2.38)           | 1.26 (0.73, 2.15) <sup>a</sup>          |
| <b>Weight of baby (grams)</b>               |                                     |                                                |                             |                                         |
| NBW                                         | 16,869 (82.1%)                      | 8,116 (78.9%)                                  | 1.00                        | 1.00                                    |
| LBW                                         | 965 (4.7%)                          | 572 (5.6%)                                     | <b>1.23 (1.11, 1.37)</b>    | <b>1.22 (1.07, 1.40)<sup>b</sup></b>    |
| HBW                                         | 2,707 (13.2%)                       | 1,600 (15.5%)                                  | <b>1.23 (1.15, 1.31)</b>    | <b>1.21 (1.13, 1.29)<sup>b</sup></b>    |
| Missing                                     | 3 (0.0%)                            | 3 (0.0%)                                       |                             |                                         |
| <b>Standardised Birthweight Score</b>       |                                     |                                                |                             |                                         |
|                                             | -0.039 (0.959)                      | 0.132 (1.036)                                  | <b>0.171 (0.145, 0.197)</b> | <b>0.167 (0.141, 0.193)<sup>c</sup></b> |
| <b>Admitted to neonatal unit</b>            |                                     |                                                |                             |                                         |
| No                                          | 18,224 (88.7%)                      | 8,747 (85.0%)                                  | 1.00                        | 1.00                                    |
| Yes                                         | 2,175 (10.6%)                       | 1,492 (14.5%)                                  | <b>1.43 (1.33, 1.53)</b>    | <b>1.46 (1.35, 1.58)<sup>b</sup></b>    |
| Missing                                     | 145 (0.7%)                          | 52 (0.5%)                                      |                             |                                         |
| <b>APGAR score at 1 min</b>                 |                                     |                                                |                             |                                         |
| Normal                                      | 18,709 (91.1%)                      | 9,350 (90.9%)                                  | 1.00                        | 1.00                                    |
| <7                                          | 1,658 (8.1%)                        | 924 (9.0%)                                     | <b>1.12 (1.03, 1.21)</b>    | 0.93 (0.83, 1.04) <sup>d</sup>          |
| Missing                                     | 177 (0.9%)                          | 17 (0.2%)                                      |                             |                                         |
| <b>APGAR score at 5 min</b>                 |                                     |                                                |                             |                                         |
| Normal                                      | 20,065 (97.7%)                      | 10,096 (98.1%)                                 | 1.00                        | 1.00                                    |
| <7                                          | 302 (1.5%)                          | 177 (1.7%)                                     | 0.86 (0.71, 1.04)           | 0.94 (0.72, 1.23) <sup>d</sup>          |
| Missing                                     | 177 (0.9%)                          | 18 (0.2%)                                      |                             |                                         |
| <b>Cryptorchidism (only males included)</b> |                                     |                                                |                             |                                         |
| No                                          | 10,284 (98.7%)                      | 5,314 (98.7%)                                  | 1.00                        | 1.00                                    |
| Yes                                         | 133 (1.3%)                          | 70 (1.3%)                                      | 1.02 (0.76, 1.36)           | 1.05 (0.78, 1.42) <sup>b</sup>          |
| <b>Neural Tube Defects</b>                  |                                     |                                                |                             |                                         |
| No                                          | 20,527 (99.9%)                      | 10,263 (99.7%)                                 | 1.00                        | 1.00                                    |
| Yes                                         | 17 (0.1%)                           | 28 (0.3%)                                      | <b>3.29 (1.80, 6.02)</b>    | <b>3.62 (1.95, 6.74)<sup>b</sup></b>    |
| <b>Amniotic Band Defects</b>                |                                     |                                                |                             |                                         |
| No                                          | 20,514 (99.9%)                      | 10,277 (99.9%)                                 | 1.00                        | 1.00                                    |
| Yes                                         | 30 (0.1%)                           | 14 (0.1%)                                      | 0.93 (0.49, 1.76)           | 0.81 (0.41, 1.58) <sup>b</sup>          |
| <b>Hypospadias (only males included)</b>    |                                     |                                                |                             |                                         |
| No                                          | 10,317 (99.0%)                      | 5,308 (98.6%)                                  | 1.00                        | 1.00                                    |
| Yes                                         | 100 (1.0%)                          | 76 (1.4%)                                      | <b>1.48 (1.09, 1.99)</b>    | <b>1.49 (1.09, 2.03)<sup>b</sup></b>    |
| <b>Gastroschisis</b>                        |                                     |                                                |                             |                                         |
| No                                          | 20,538 (99.9%)                      | 10,284 (99.9%)                                 | 1.00                        | 1.00                                    |
| Yes                                         | 6 (0.1%)                            | 7 (0.1%)                                       | 2.33 (0.78, 6.94)           | 2.93 (0.97, 8.88) <sup>b</sup>          |
| <b>At least one outcome*</b>                |                                     |                                                |                             |                                         |
| No                                          | 20,258 (98.6%)                      | 10,097 (98.1%)                                 | 1.00                        | 1.00                                    |
| Yes                                         | 286 (1.4%)                          | 194 (1.9%)                                     | <b>1.36 (1.13, 1.64)</b>    | <b>1.38 (1.15, 1.67)<sup>b</sup></b>    |

maternal hypertensive disorders, maternal antepartum haemorrhage

<sup>b</sup> Adjusted for year of delivery, maternal age at delivery, SIMD, first gestational booking, gestation at delivery

<sup>c</sup> Adjusted for year of delivery, maternal age at delivery, SIMD, first gestational booking

<sup>d</sup> Adjusted for year of delivery, maternal age at delivery, SIMD, first gestational booking, type of delivery

\*Including cryptorchidism, neural tube defects, amniotic band defects, hypospadias, gastroschisis

n/a,  
not appl  
icable;  
n,  
nu  
mb  
er  
of  
pre  
gna  
ncie  
s  
<sup>a</sup>  
Adj  
uste  
d  
for  
year  
of  
deli  
very  
,  
mat  
ern  
al  
age  
at  
deli  
very  
,  
SIM  
D,  
first  
gest  
atio  
nal  
boo  
king  
,

1  
2  
3 647 **Figure 1:** Flowchart of cohort selection and sub-group analyses. n=number of  
4  
5 648 pregnancies in each analysis. \*98.3% of pregnancies using only diclofenac occurred  
6  
7 649 during 2005-2015, therefore analysis was performed only on data from that decade  
8  
9 650 to rule out any temporal effect.  
10  
11

12 651

14 652 **Figure 2:** Prevalence of use during pregnancy for each analgesic sub-group over  
15  
16  
17 653 our 30-year study period. In 2005 there was a change in legislation making  
18  
19 654 diclofenac available without prescription.  
20

21 655

23 656 **Figure S1:** Directed acyclic graph (DAG) of exposure to outcome path and relevant  
24  
25  
26 657 measured and unmeasured biasing factors in our analysis.  
27

28 658  
29  
30  
31  
32  
33  
34  
35  
36  
37  
38  
39  
40  
41  
42  
43  
44  
45  
46  
47  
48  
49  
50  
51  
52  
53  
54  
55  
56  
57  
58  
59  
60

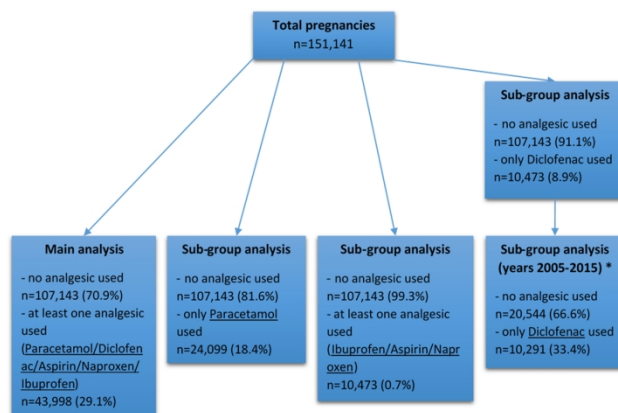

Figure 1: Flowchart of cohort selection and sub-group analyses. n=number of pregnancies in each analysis. \*98.3% of pregnancies using only diclofenac occurred during 2005-2015, therefore analysis was performed only on data from that decade to rule out any temporal effect.

254x190mm (300 x 300 DPI)

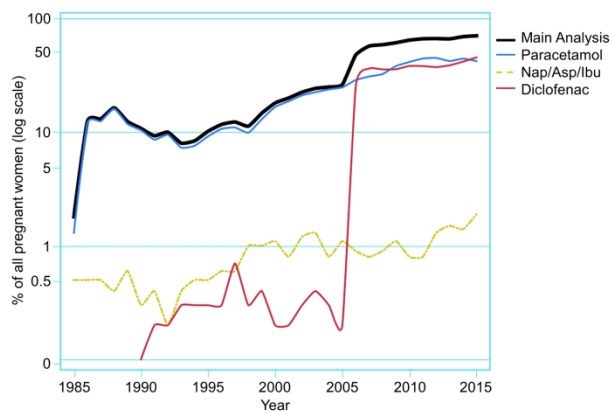

Figure 2: Prevalence of use during pregnancy for each analgesic sub-group over our 30-year study period. In 2005 there was a change in legislation making diclofenac available without prescription.

254x190mm (300 x 300 DPI)



1  
2  
3  
4  
5  
6  
7  
8  
9  
10  
11  
12  
13  
14  
15  
16  
17  
18  
19  
20  
21  
22  
23  
24  
25  
26  
27  
28  
29  
30  
31  
32  
33  
34  
35  
36  
37  
38  
39  
40  
41

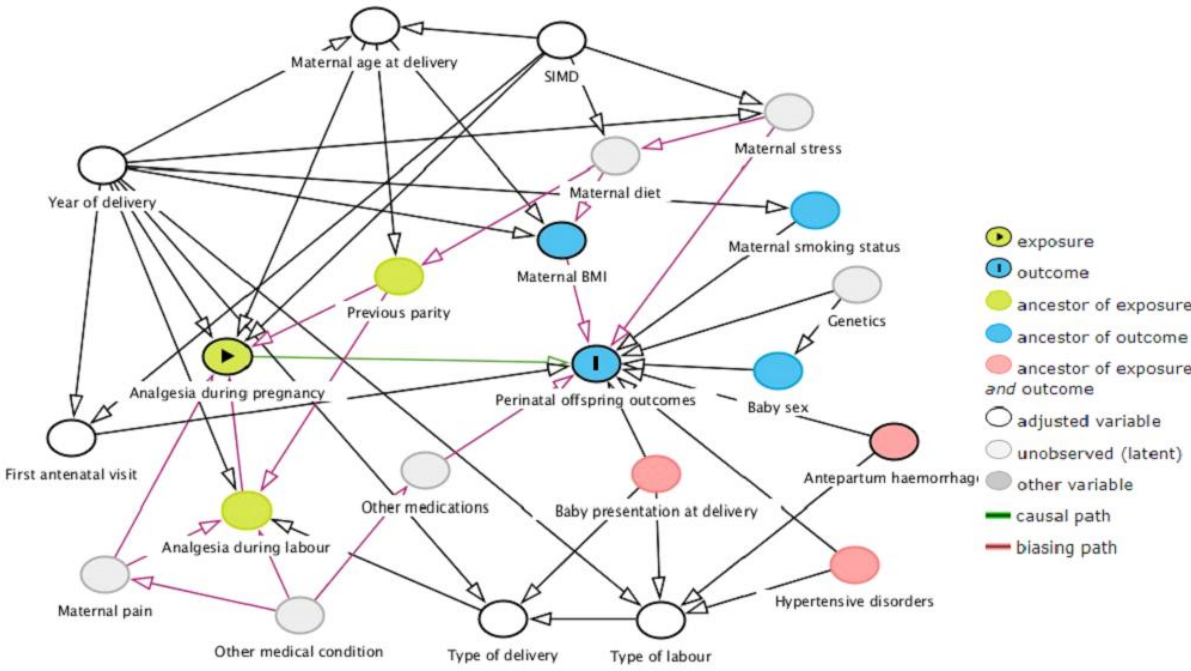

STROBE Statement—Checklist of items that should be included in reports of *cohort studies*

|                              | Item No | Recommendation                                                                                                                                                                       | Paragraph #                                                  |
|------------------------------|---------|--------------------------------------------------------------------------------------------------------------------------------------------------------------------------------------|--------------------------------------------------------------|
| <b>Title and abstract</b>    | 1       | (a) Indicate the study's design with a commonly used term in the title or the abstract                                                                                               | <b>Title &amp; Abstract<br/>Pages 1-3</b>                    |
|                              |         | (b) Provide in the abstract an informative and balanced summary of what was done and what was found                                                                                  | <b>Abstract<br/>Pages 2-3</b>                                |
| <b>Introduction</b>          |         |                                                                                                                                                                                      |                                                              |
| Background/rationale         | 2       | Explain the scientific background and rationale for the investigation being reported                                                                                                 | <b>Introduction<br/>Page 5</b>                               |
| Objectives                   | 3       | State specific objectives, including any prespecified hypotheses                                                                                                                     | <b>Introduction<br/>Page 5</b>                               |
| <b>Methods</b>               |         |                                                                                                                                                                                      |                                                              |
| Study design                 | 4       | Present key elements of study design early in the paper                                                                                                                              | <b>Methods<br/>Page 7</b>                                    |
| Setting                      | 5       | Describe the setting, locations, and relevant dates, including periods of recruitment, exposure, follow-up, and data collection                                                      | <b>Methods<br/>Page 7</b>                                    |
| Participants                 | 6       | (a) Give the eligibility criteria, and the sources and methods of selection of participants. Describe methods of follow-up                                                           | <b>Methods<br/>Pages 7-8</b>                                 |
|                              |         | (b) For matched studies, give matching criteria and number of exposed and unexposed                                                                                                  | n/a                                                          |
| Variables                    | 7       | Clearly define all outcomes, exposures, predictors, potential confounders, and effect modifiers. Give diagnostic criteria, if applicable                                             | <b>Methods<br/>Pages 8-9</b>                                 |
| Data sources/<br>measurement | 8*      | For each variable of interest, give sources of data and details of methods of assessment (measurement). Describe comparability of assessment methods if there is more than one group | <b>Methods<br/>Pages 8-9</b>                                 |
| Bias                         | 9       | Describe any efforts to address potential sources of bias                                                                                                                            | <b>Methods<br/>Pages 7-8</b>                                 |
| Study size                   | 10      | Explain how the study size was arrived at                                                                                                                                            | <b>Methods<br/>Page 7</b>                                    |
| Quantitative variables       | 11      | Explain how quantitative variables were handled in the analyses. If applicable, describe which groupings were chosen and why                                                         | <b>Methods<br/>Pages 8-9</b>                                 |
| Statistical methods          | 12      | (a) Describe all statistical methods, including those used to control for confounding                                                                                                | <b>Statistical<br/>Analysis<br/>paragraph<br/>pages 9-10</b> |
|                              |         | (b) Describe any methods used to examine subgroups and interactions                                                                                                                  | <b>Statistical<br/>Analysis<br/>paragraph<br/>pages 9-10</b> |
|                              |         | (c) Explain how missing data were addressed                                                                                                                                          | <b>Statistical<br/>Analysis<br/>paragraph<br/>pages 9-10</b> |
|                              |         | (d) If applicable, explain how loss to follow-up was addressed                                                                                                                       | n/a                                                          |
|                              |         | (e) Describe any sensitivity analyses                                                                                                                                                | n/a                                                          |

| <b>Results</b>           |     |                                                                                                                                                                                                                                                                                                 |                                                                        |
|--------------------------|-----|-------------------------------------------------------------------------------------------------------------------------------------------------------------------------------------------------------------------------------------------------------------------------------------------------|------------------------------------------------------------------------|
| Participants             | 13* | (a) Report numbers of individuals at each stage of study—eg numbers potentially eligible, examined for eligibility, confirmed eligible, included in the study, completing follow-up, and analysed<br>(b) Give reasons for non-participation at each stage<br>(c) Consider use of a flow diagram | <b>Figure 1</b><br><b>Results</b><br><b>Page 11</b><br><b>Figure 1</b> |
| Descriptive data         | 14* | (a) Give characteristics of study participants (eg demographic, clinical, social) and information on exposures and potential confounders                                                                                                                                                        | <b>Table 1</b><br><b>Pages 29-31</b>                                   |
|                          |     | (b) Indicate number of participants with missing data for each variable of interest                                                                                                                                                                                                             | <b>Table 1</b><br><b>Pages 29-31</b>                                   |
|                          |     | (c) Summarise follow-up time (eg, average and total amount)                                                                                                                                                                                                                                     | n/a                                                                    |
| Outcome data             | 15* | Report numbers of outcome events or summary measures over time                                                                                                                                                                                                                                  | <b>Tables 2 and 3</b><br><b>Pages 32-35</b>                            |
| Main results             | 16  | (a) Give unadjusted estimates and, if applicable, confounder-adjusted estimates and their precision (eg, 95% confidence interval). Make clear which confounders were adjusted for and why they were included                                                                                    | <b>Tables 2 and 3</b><br><b>Pages 32-35</b>                            |
|                          |     | (b) Report category boundaries when continuous variables were categorized                                                                                                                                                                                                                       | <b>Table 1</b><br><b>Pages 29-31</b>                                   |
|                          |     | (c) If relevant, consider translating estimates of relative risk into absolute risk for a meaningful time period                                                                                                                                                                                | <b>Tables 2 and 3</b><br><b>Pages 32-35</b>                            |
| Other analyses           | 17  | Report other analyses done—eg analyses of subgroups and interactions, and sensitivity analyses                                                                                                                                                                                                  | n/a                                                                    |
| <b>Discussion</b>        |     |                                                                                                                                                                                                                                                                                                 |                                                                        |
| Key results              | 18  | Summarise key results with reference to study objectives                                                                                                                                                                                                                                        | <b>Discussion</b><br><b>Pages 16-17</b>                                |
| Limitations              | 19  | Discuss limitations of the study, taking into account sources of potential bias or imprecision. Discuss both direction and magnitude of any potential bias                                                                                                                                      | <b>Discussion</b><br><b>Pages 16-18</b>                                |
| Interpretation           | 20  | Give a cautious overall interpretation of results considering objectives, limitations, multiplicity of analyses, results from similar studies, and other relevant evidence                                                                                                                      | <b>Discussion</b><br><b>Pages 19-21</b>                                |
| Generalisability         | 21  | Discuss the generalisability (external validity) of the study results                                                                                                                                                                                                                           | <b>Discussion</b><br><b>Pages 20-21</b>                                |
| <b>Other information</b> |     |                                                                                                                                                                                                                                                                                                 |                                                                        |
| Funding                  | 22  | Give the source of funding and the role of the funders for the present study and, if applicable, for the original study on which the present article is based                                                                                                                                   | <b>Manuscript</b><br><b>pages 4 and 21</b>                             |

\*Give information separately for exposed and unexposed groups.

**Note:** An Explanation and Elaboration article discusses each checklist item and gives methodological background and published examples of transparent reporting. The STROBE checklist is best used in conjunction with this article (freely

1 available on the Web sites of PLoS Medicine at <http://www.plosmedicine.org/>, Annals of Internal Medicine at  
2 <http://www.annals.org/>, and Epidemiology at <http://www.epidem.com/>). Information on the STROBE Initiative is  
3 available at <http://www.strobe-statement.org>.  
4  
5  
6  
7  
8  
9  
10  
11  
12  
13  
14  
15  
16  
17  
18  
19  
20  
21  
22  
23  
24  
25  
26  
27  
28  
29  
30  
31  
32  
33  
34  
35  
36  
37  
38  
39  
40  
41  
42  
43  
44  
45  
46  
47  
48  
49  
50  
51  
52  
53  
54  
55  
56  
57  
58  
59  
60

For peer review only

# BMJ Open

## Maternal over-the-counter analgesics use during pregnancy and adverse perinatal outcomes: Cohort study of 151,141 singleton pregnancies

|                                 |                                                                                                                                                                                                                                                                                                                                                         |
|---------------------------------|---------------------------------------------------------------------------------------------------------------------------------------------------------------------------------------------------------------------------------------------------------------------------------------------------------------------------------------------------------|
| Journal:                        | <i>BMJ Open</i>                                                                                                                                                                                                                                                                                                                                         |
| Manuscript ID                   | bmjopen-2020-048092.R1                                                                                                                                                                                                                                                                                                                                  |
| Article Type:                   | Original research                                                                                                                                                                                                                                                                                                                                       |
| Date Submitted by the Author:   | 12-Sep-2021                                                                                                                                                                                                                                                                                                                                             |
| Complete List of Authors:       | Zafeiri, Aikaterini; University of Aberdeen, School of Medicine, Medical Sciences and Nutrition<br>Raja, Edwin Amalraj; University of Aberdeen, Medical Statistics Team<br>Mitchell, Rod; The University of Edinburgh<br>Hay, David ; University of Edinburgh<br>Bhattacharya, Sohinee; University of Aberdeen<br>Fowler, Paul ; University of Aberdeen |
| <b>Primary Subject Heading</b>: | Epidemiology                                                                                                                                                                                                                                                                                                                                            |
| Secondary Subject Heading:      | Obstetrics and gynaecology                                                                                                                                                                                                                                                                                                                              |
| Keywords:                       | Epidemiology < INFECTIOUS DISEASES, OBSTETRICS, CLINICAL PHARMACOLOGY                                                                                                                                                                                                                                                                                   |
|                                 |                                                                                                                                                                                                                                                                                                                                                         |

SCHOLARONE™  
Manuscripts

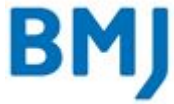

I, the Submitting Author has the right to grant and does grant on behalf of all authors of the Work (as defined in the below author licence), an exclusive licence and/or a non-exclusive licence for contributions from authors who are: i) UK Crown employees; ii) where BMJ has agreed a CC-BY licence shall apply, and/or iii) in accordance with the terms applicable for US Federal Government officers or employees acting as part of their official duties; on a worldwide, perpetual, irrevocable, royalty-free basis to BMJ Publishing Group Ltd ("BMJ") its licensees and where the relevant Journal is co-owned by BMJ to the co-owners of the Journal, to publish the Work in this journal and any other BMJ products and to exploit all rights, as set out in our [licence](#).

The Submitting Author accepts and understands that any supply made under these terms is made by BMJ to the Submitting Author unless you are acting as an employee on behalf of your employer or a postgraduate student of an affiliated institution which is paying any applicable article publishing charge ("APC") for Open Access articles. Where the Submitting Author wishes to make the Work available on an Open Access basis (and intends to pay the relevant APC), the terms of reuse of such Open Access shall be governed by a Creative Commons licence – details of these licences and which [Creative Commons](#) licence will apply to this Work are set out in our licence referred to above.

Other than as permitted in any relevant BMJ Author's Self Archiving Policies, I confirm this Work has not been accepted for publication elsewhere, is not being considered for publication elsewhere and does not duplicate material already published. I confirm all authors consent to publication of this Work and authorise the granting of this licence.

1 **Title:** Maternal over-the-counter analgesics use during pregnancy and adverse  
2 perinatal outcomes: Cohort study of 151,141 singleton pregnancies

3  
4 **Authors:** <sup>1</sup>Aikaterini ZAFEIRI, MSci, Ms, <sup>2</sup>Edwin A. RAJA, PhD, <sup>3</sup>Rod T. MITCHELL,  
5 MBChB, PhD, <sup>4</sup>David C. HAY, PhD, <sup>5</sup>Sohinee BHATTACHARYA, MBBS, PhD, <sup>1</sup>Paul  
6 A. FOWLER, FRSB, PhD

7 <sup>1</sup>Institute of Medical Sciences, School of Medicine, Medical Sciences and Nutrition,  
8 University of Aberdeen, Aberdeen, United Kingdom, <sup>2</sup>Medical Statistics Team,  
9 Institute of Applied Health Sciences, School of Medicine, Medical Sciences and  
10 Nutrition, University of Aberdeen, Aberdeen, United Kingdom, <sup>3</sup>MRC Centre for  
11 Reproductive Health, The Queen's Medical Research Institute, University of  
12 Edinburgh, 47 Little France Crescent, Edinburgh, EH16 4JT, UK, <sup>4</sup>MRC Centre for  
13 Regenerative Medicine, 5 Little France Drive, Edinburgh, UK, <sup>5</sup>Aberdeen Centre for  
14 Women's Health Research, Institute of Applied Health Sciences, School of Medicine,  
15 Medical Sciences and Nutrition, University of Aberdeen, Aberdeen, United Kingdom,

16 **Corresponding Author:** Aikaterini Zafeiri, Institute of Medical Sciences, School of  
17 Medicine, Medical Sciences and Nutrition, University of Aberdeen, Aberdeen, United  
18 Kingdom, cell phone number: (+44)7713837285, email: [r01az17@abdn.ac.uk](mailto:r01az17@abdn.ac.uk)

19 **Running Title:** Maternal over-the-counter analgesia and offspring outcomes

1  
2  
3 20 **Abstract**  
4

5  
6 21 OBJECTIVES  
7

8  
9 22 To identify any associations between *in utero* exposure to five over-the-counter (non-  
10  
11 23 prescription) analgesics (paracetamol, ibuprofen, aspirin, diclofenac, naproxen) and  
12  
13 24 adverse neonatal outcomes.  
14  
15

16 25 DESIGN  
17

18  
19 26 Retrospective cohort study using the Aberdeen Maternity and Neonatal Databank.  
20  
21

22 27 PARTICIPANTS  
23

24  
25 28 151,141 singleton pregnancies between 1985 and 2015.  
26  
27

28 29 MAIN OUTCOME MEASURES  
29

30  
31 30 Premature delivery (<37 weeks), stillbirth, neonatal death, birthweight, standardised  
32  
33 31 birthweight score, neonatal unit admission, APGAR score at 1 and 5 minutes, neural  
34  
35 32 tube and amniotic band defects, gastroschisis and, in males, cryptorchidism, and  
36  
37 33 hypospadias.  
38  
39

40 41 RESULTS  
42

43  
44 35 83.7% of women taking over-the-counter analgesics reported first trimester use  
45  
46 36 when specifically asked about use at their first antenatal clinic visit. Pregnancies  
47  
48 37 exposed to at least one of the five analgesics were significantly independently  
49  
50 38 associated with increased risks for premature delivery <37 weeks (aOR=1.50,  
51  
52 39 95%CI 1.43-1.58), stillbirth (aOR=1.33, 95%CI 1.15-1.54), neonatal death  
53  
54 40 (aOR=1.56, 95%CI 1.27-1.93), birthweight <2,500g (aOR=1.28, 95%CI 1.20-1.37),  
55  
56 41 birthweight >4,000g (aOR=1.09, 95%CI 1.05-1.13), admission to neonatal unit  
57  
58  
59  
60



1  
2  
3 42 (aOR=1.57, 95%CI 1.51-1.64), APGAR score <7 at 1 minute (aOR=1.18, 95%CI  
4  
5 43 1.13-1.23) and 5 minutes (aOR=1.48, 95%CI 1.35-1.62), neural tube defects  
6  
7 44 (aOR=1.64, 95%CI 1.08-2.47) and hypospadias (aOR=1.27, 95%CI 1.05-1.54 males  
8  
9 45 only). The overall prevalence of over-the-counter analgesics use during pregnancy  
10  
11 46 was 29.1%, however it rapidly increased over the 30-year study period, to include  
12  
13 47 over 60% of women in the last seven years of the study. This makes our findings  
14  
15 48 highly relevant to the wider pregnant population.  
16  
17  
18  
19

## 20 49 CONCLUSIONS

21  
22  
23 50 Over-the-counter (non-prescription) analgesics consumption during pregnancy was  
24  
25 51 associated with a substantially higher risk for adverse perinatal health outcomes in  
26  
27 52 the offspring. The use of paracetamol in combination with other non-steroidal anti-  
28  
29 53 inflammatory drugs conferred the highest risk. The increased risks of adverse  
30  
31 54 neonatal outcomes associated with non-prescribed, over-the-counter, analgesics use  
32  
33 55 during pregnancy indicate that healthcare guidance for pregnant women regarding  
34  
35 56 analgesic use need urgent updating.  
36  
37  
38  
39  
40  
41  
42

43 58 **Funding** Biotechnology and Biological Sciences Research council (BBSRC) funding  
44  
45 59 under the EASTBIO doctoral training programme (grant number 1942576) to AZ and  
46  
47 60 EU Horizon 2020 project FREIA (Grant Number 825100) to PAF. RTM is supported  
48  
49 61 by MRC Centre for Reproductive Health Grant MR/N022556/1.  
50  
51

52 62 **Key words** acetaminophen, aspirin, diclofenac, ibuprofen, *in utero* exposure,  
53  
54 63 naproxen, offspring outcomes, over-the-counter analgesics, offspring outcomes,  
55  
56 64 paracetamol, pregnancy  
57  
58  
59  
60

## 66 Introduction

67 Globally 23-85% of women use one or more types of prescribed medications during  
68 pregnancy <sup>1,2</sup>. A similarly high proportion of expectant mothers self-medicate using  
69 non-prescription, “over-the-counter” (OTC) medicines <sup>3,4</sup> and use during pregnancy  
70 is becoming increasingly prevalent, especially in Western countries <sup>5</sup>. While some  
71 analgesics e.g. paracetamol (acetaminophen) are considered safe to consume  
72 throughout pregnancy, use of non-steroidal anti-inflammatory drugs (NSAIDs) is not  
73 recommended in pregnancy unless on the advice of a medical specialist and should  
74 be avoided beyond gestational week 30 because of the risk of premature closure of  
75 the ductus arteriosus. However, current evidence is largely conflicting regarding the  
76 safety of gestational analgesic use both for the pregnancy and offspring health <sup>6</sup>.  
77 Several studies have reported increased risks for multiple adverse outcomes  
78 including hypospadias, cryptorchidism, amniotic band defects and neural tube  
79 defects <sup>7-11</sup>, whilst others have not found significant associations <sup>12-17</sup>. Taken overall,  
80 this has led to significant concern that postnatal health is adversely affected by  
81 maternal analgesic use during pregnancy <sup>18</sup>.

82 The use of small cohorts in the current epidemiological studies makes it difficult to  
83 draw firm conclusions and definite recommendations<sup>12,17,19,20</sup>. There are other  
84 aspects of analgesic use that have to be taken into account. Firstly, due to their  
85 abundance, it is not always feasible to determine exact consumption rates and  
86 dosage. Secondly, even though the mechanisms of action for most of these  
87 compounds is not fully understood, most over-the-counter analgesics can diffuse  
88 through the placenta and reach the developing fetus <sup>21</sup>. Thirdly, maternal  
89 pharmacokinetics during pregnancy are altered and there are limited pregnancy  
90 safety data for these compounds.

1  
2  
3 91 Given the diversity in study population, methodology, sample size and findings in the  
4  
5 92 published studies, we conclude that more extensive data from larger cohorts are  
6  
7 93 essential in order to understand the risks over-the-counter analgesic use during  
8  
9 94 pregnancy pose to neonatal health and function. Here we address many limitations  
10  
11 95 of previous studies by analysing one of the largest cohorts, widest range of health  
12  
13 96 data and, pregnancy use of five over-the-counter analgesics consumed in  
14  
15 97 combination or separately. We report on the prevalence of maternal consumption of  
16  
17 98 five different over-the-counter analgesics during pregnancy and their associations  
18  
19 99 with offspring neonatal outcomes using a large cohort of 151,141 singleton  
20  
21 100 pregnancies spanning three decades of population-based data from a single  
22  
23 101 maternity hospital serving the entire population of Aberdeenshire in the North East of  
24  
25 102 Scotland.  
26  
27  
28  
29  
30  
31  
32  
33  
34  
35  
36  
37  
38  
39  
40  
41  
42  
43  
44  
45  
46  
47  
48  
49  
50  
51  
52  
53  
54  
55  
56  
57  
58  
59  
60

## 103 **Materials and Methods**

104 This retrospective cohort study utilised data collected in the Aberdeen Maternity and  
105 Neonatal Databank (AMND) in Aberdeen, UK on 151,141 pregnancies over a 30  
106 year period (1985-2015). Details about AMND have been previously published <sup>22</sup>.  
107 Data were collected from medical notes of women retrospectively after delivery.  
108 Women were specifically asked about their use of over-the-counter (non-  
109 prescription) analgesics at their first antenatal clinic. Data were entered by dedicated  
110 coding staff into a computerised database. Data validity was ensured via checking  
111 completeness of data entry against NHS (UK National Health Service) returns  
112 monthly and constant data cleaning and validation against case notes reported  
113 quarterly by the Data Management team to the AMND Steering Committee. A  
114 research protocol was submitted and approved by the AMND Steering Committee  
115 before data extraction. Approval was received on 6 June 2018. The dataset was fully  
116 anonymised, therefore there was no requirement for NHS ethics committee approval.  
117 There was no involvement of patients or the public in the design, or conduct, or  
118 reporting, or dissemination plans of our research.

119 The main analysis considered consumption during pregnancy of at least one out of  
120 five different analgesics: paracetamol (no; yes), ibuprofen (no; yes), naproxen (no;  
121 yes), diclofenac (no; yes) or aspirin (no; yes) as the exposure group against no  
122 analgesic consumption as the unexposed group. Then, three sub-group analyses  
123 against the control group were performed using only paracetamol, only diclofenac, or  
124 at least one analgesic from aspirin/naproxen/ibuprofen as exposure groups,  
125 excluding pregnancies exposed to multiple analgesics at the same time (Figure 1).  
126 As 98.3% of pregnancies using diclofenac were between 2005 and 2015, diclofenac  
127 sub-group analysis only considered pregnancies during that time frame in order to

1  
2  
3 128 rule out any temporal effect. Analgesic consumption was not further assessed  
4  
5 129 analytically.  
6  
7

8 130 The offspring outcomes compared between control and exposed groups were:  
9  
10 131 gestation at delivery (preterm <37 gestation weeks, term  $\geq$ 37 gestation weeks),  
11  
12 132 pregnancy outcome (livebirth, stillbirth, neonatal death), baby weight (low birth  
13  
14 133 weight (LBW)  $\leq$ 2,499 g, high birth weight (HBW)  $\geq$ 4,000 g, normal birth weight  
15  
16 134 (NBW) 2,500g-3,999 g), standardised birthweight score was considered as a  
17  
18 135 continuous variable as previously described by Campbell and colleagues<sup>23</sup>, baby  
19  
20 136 admission to neonatal unit (no; yes), APGAR score at one and five minutes (<7,  $\geq$ 7),  
21  
22 137 cryptorchidism (no; yes) (ICD-10 code Q53), neural tube defects (no; yes) (ICD-10  
23  
24 138 code Q00-07), amniotic band defects (no; yes) (ICD-10 codes Q70-74), hypospadias  
25  
26 139 (no; yes) (ICD-10 code Q54), gastroschisis (no; yes) (ICD-10 code Q79.3). A  
27  
28 140 composite outcome (presence of at least one congenital anomaly (no; yes)) was  
29  
30 141 created using the variables neural tube defects, amniotic band defects, and  
31  
32 142 gastroschisis and, in males, cryptorchidism and hypospadias.  
33  
34  
35  
36  
37  
38

39 143 The baseline characteristics compared between exposed and unexposed  
40  
41 144 pregnancies were (reference category first): year of delivery (1985-1994, 1995-2004,  
42  
43 145 2005-2015), maternal age at delivery (20-25, <20, 26-35, >35 years), previous  
44  
45 146 pregnancy (no; yes), maternal body mass index (BMI) (normal weight 18.5-24.9  
46  
47 147 kg/m<sup>2</sup>, underweight <18.5 kg/m<sup>2</sup>, overweight 25-29.9 kg/m<sup>2</sup>, obese >30 kg/m<sup>2</sup>),  
48  
49 148 maternal first antenatal visit (1st, 2nd, 3rd trimester), maternal smoking status (non-  
50  
51 149 smoker, smoker, ex-smoker), Scottish Index of Multiple Deprivation (SIMD) decile (1-  
52  
53 150 6, 7-10, decreasing deprivation with increasing score), maternal hypertensive  
54  
55 151 disorders (no disorder, gestational hypertension, preeclampsia, eclampsia), maternal  
56  
57 152 antepartum haemorrhage (no haemorrhage, abruption, placental previa), type of  
58  
59  
60

1  
2  
3 153 labour (spontaneous, elective caesarean section, induced), type of delivery  
4  
5 154 (spontaneous vaginal delivery, instrumental, caesarean section), analgesia during  
6  
7 155 labour (no; yes), baby presentation at delivery (occiput anterior, occiput posterior),  
8  
9 156 baby sex (female; male).  
10  
11  
12

### 13 157 **Patient and Public Involvement**

14  
15  
16 158 This was a retrospective analysis of data on singleton pregnancies over a 30-year  
17  
18 159 period. Therefore, there was no involvement of patients or the public in the design,  
19  
20 160 conduct, reporting or any other aspect of the study.  
21  
22

23  
24 161

### 26 162 **Statistical Analysis**

27  
28  
29 163 Baseline characteristics were compared between exposed and unexposed  
30  
31 164 pregnancies to any analgesic using  $\chi^2$  test for categorical variables and t-test for  
32  
33 165 normally distributed continuous variables as appropriate. Relationships between  
34  
35 166 exposures and outcomes were examined by binary logistic regression for binary  
36  
37 167 outcome variables, multinomial logistic regression for nominal categorical outcome  
38  
39 168 variables, and multiple linear regression for continuous variables. The strength of  
40  
41 169 association was reported as odds ratios (ORs) with 95% confidence intervals (CI).  
42  
43 170 The socio-demographic characteristics that were likely to confound our exposure-to-  
44  
45 171 outcome path were identified using a directed acyclic graph (DAG) (Figure S1)<sup>24</sup>.  
46  
47 172 Factors that were associated with consumption of over-the-counter analgesics during  
48  
49 173 pregnancy at 10% level of significance and deemed clinically relevant, were included  
50  
51 174 in the model as confounders. All outcomes were adjusted for year of delivery,  
52  
53 175 maternal age at delivery, SIMD and maternal first antenatal visit. In addition to these  
54  
55 176 confounders, individual outcomes were adjusted for relevant cofactors. Gestation at  
56  
57  
58  
59  
60

1  
2  
3 177 delivery and pregnancy outcome were both additionally adjusted for maternal  
4  
5 178 hypertensive disorders and antepartum haemorrhage. Weight of the baby, neonatal  
6  
7 179 unit admission, cryptorchidism, neural tube defects, amniotic band defects,  
8  
9  
10 180 hypospadias and gastroschisis variables were also adjusted for gestation at delivery.  
11  
12 181 APGAR score at one and five minutes were adjusted for type of delivery. A p-value  
13  
14 182 of less than 0.05 was considered statistically significant. All statistical analyses were  
15  
16 183 carried out using IBM SPSS Statistics version 25.0 (Released 2017. IBM SPSS  
17  
18 184 Statistics for Windows, Armonk, NY: IBM Corp.). R version 3.6.2 was used to  
19  
20 185 generate Figure 2. Numbers needed to harm (NNH) were also calculated for each  
21  
22 186 outcome and are provided in Supplementary Tables 1 and 2.  
23  
24  
25  
26  
27  
28  
29  
30  
31  
32  
33  
34  
35  
36  
37  
38  
39  
40  
41  
42  
43  
44  
45  
46  
47  
48  
49  
50  
51  
52  
53  
54  
55  
56  
57  
58  
59  
60

## 187 Results

188 83.7% of women taking over-the-counter analgesics reported first trimester use  
189 when specifically asked about use at their first antenatal clinic. Overall, from the total  
190 151,141 pregnancies across 30 years in 107,143 (70.9%) pregnancies, no over-the-  
191 counter analgesic consumption was reported. At least one over-the-counter  
192 analgesic was consumed in 43,998 (29.1%) pregnancies, whereas paracetamol use  
193 alone was reported in 24,099 (18.4%) pregnancies. Diclofenac use was observed in  
194 20.0% of pregnancies in the 10-year period when diclofenac was available over-the-  
195 counter (without prescription). Finally, at least one out of three analgesics (naproxen,  
196 ibuprofen, aspirin) was consumed in 762 (0.7%) pregnancies (Figure 1).

197 Prevalence of use for all five analgesics increased dramatically over the 30-year  
198 study period (1985-2015) (Figure 2). Pregnancies with consumption of at least one  
199 analgesic increased from 1.8% in 1985 to 70.6% in 2015. Pregnancies reporting  
200 paracetamol use were 1.3% in 1985 and it continuously increased reaching 42.2%  
201 in 2015. Naproxen, ibuprofen or aspirin consumption during pregnancy was less  
202 prevalent (Figure 2A), however it also increased during the 30-year study period,  
203 starting at 0.5% in 1985 and reaching 1.9% in 2015 (Figure 2B). Diclofenac was  
204 consumed in very few pregnancies between 1985 (<0.01%) and 2005 (0.2%).  
205 Percentage of consumption, however, dramatically increased during the next decade  
206 following deregulation of diclofenac, reaching 25.0% in just one year (2006) and  
207 45.6% of all pregnancies in 2015.

208 Table 1 compares the baseline characteristics between the unexposed group of  
209 pregnancies where no analgesic was consumed and each of the exposure groups. In  
210 most, but not all, comparisons across all four analyses, there was a statistically



1  
2  
3 211 significant difference ( $p < 0.001$ ) for most variables. In the paracetamol sub-group  
4  
5 212 analysis, baby presentation at delivery ( $p = 0.525$ ) and sex of the baby ( $p = 0.861$ ) were  
6  
7 213 not significantly different between the groups. In the analysis considering  
8  
9 214 consumption of at least one analgesic from aspirin/naproxen/ibuprofen, again the  
10  
11 215 variables for baby presentation at delivery ( $p = 0.093$ ) and sex of the baby ( $p = 0.732$ ),  
12  
13 216 together with maternal smoking status ( $p = 0.132$ ) and maternal antepartum  
14  
15 217 haemorrhage ( $p = 0.434$ ) were not statistically different compared to the unexposed  
16  
17 218 group. All variables were statistically different between unexposed and exposed  
18  
19 219 groups for the main analysis and diclofenac sub-group analysis.  
20  
21  
22  
23

24 220 Table 2 summarises the comparison of neonatal outcomes between the unexposed  
25  
26 221 group (no analgesic at all) and the exposed groups of at least one analgesic, only  
27  
28 222 paracetamol and at least one out of aspirin/naproxen/ibuprofen. Comparison of  
29  
30 223 outcomes for the diclofenac sub-group analysis is shown in Table 3.  
31  
32  
33

34 224

### 37 225 **All analgesics and neonatal outcomes**

38  
39  
40 226 As shown in Table 2, compared to unexposed pregnancies in which women did not  
41  
42 227 use any analgesic, pregnancies with consumption of at least one analgesic  
43  
44 228 (paracetamol, diclofenac, aspirin, naproxen, ibuprofen) were independently  
45  
46 229 associated with significantly higher odds for premature delivery (aOR=1.50, 95%CI  
47  
48 230 1.43-1.58), stillbirth (aOR=1.33, 95%CI 1.15-1.54), LBW (aOR=1.28, 95%CI 1.20-  
49  
50 231 1.37), HBW (aOR=1.09, 95%CI 1.05-1.13), baby admission to neonatal unit  
51  
52 232 (aOR=1.57, 95%CI 1.51-1.64), APGAR score <7 at five minutes (aOR=1.48, 95%CI  
53  
54 233 1.35-1.62), neural tube defects (aOR=1.64, 95%CI 1.08-2.47) and hypospadias  
55  
56 234 (aOR=1.27, 95%CI 1.05-1.54) in adjusted analyses. Significantly decreased odds for  
57  
58  
59  
60

1  
2  
3 235 APGAR score <7 at one minute were found in the crude analysis (cOR=0.96, 95%CI  
4  
5 236 0.92-0.99), however when adjusted for year of delivery, maternal age at delivery,  
6  
7 237 SIMD, first gestational booking and type of delivery, the significance changed  
8  
9 238 direction showing significantly increased odds (aOR=1.18, 95%CI 1.13-1.23). A  
10  
11 239 significantly lower standardised birthweight score (p=0.046, 95%CI 0.032-0.059) was  
12  
13 240 found for the exposure group compared to no analgesic at all. Cryptorchidism  
14  
15 241 (aOR=0.92, 95%CI 0.77-1.11), amniotic band defects (aOR=1.02, 95%CI 0.71-1.47),  
16  
17 242 gastroschisis (aOR=1.10, 95%CI 0.56-2.20) and the composite outcome variable  
18  
19 243 (aOR=1.12, 95%CI 0.99-1.26), were all associated with increased odds in the  
20  
21 244 exposure group compared to not exposed, however the association was not  
22  
23 245 significant in the adjusted model. There was no significant association between  
24  
25 246 neonatal death and exposure to at least one analgesic in the crude analysis  
26  
27 247 (cOR=1.19, 95%CI 0.99-1.42), however there were significantly higher odds of  
28  
29 248 neonatal death in the adjusted analysis (aOR=1.56, 95%CI 1.27-1.93) in the  
30  
31 249 exposed group compared to control.  
32  
33  
34  
35  
36  
37  
38  
39  
40

### 41 251 **Paracetamol and neonatal outcomes**

42  
43  
44 252 In the sub-group analysis considering only paracetamol consumption during  
45  
46 253 pregnancy as our exposure group, most of the associations reported in the main  
47  
48 254 analysis remained significant with the same direction of significance (Table 2). The  
49  
50 255 differences were: maternal paracetamol consumption during pregnancy was  
51  
52 256 associated with significantly decreased odds for offspring HBW (cOR=0.94, 95%CI  
53  
54 257 0.90-0.99) in the crude analysis however significance was lost in the adjusted model  
55  
56 258 (aOR=0.98, 95%CI 0.93-1.02), and there were no significant associations in the  
57  
58  
59  
60

259 adjusted models for neural tube defects (aOR=1.21, 95%CI 0.71-2.06) and  
260 hypospadias (aOR=1.07, 95%CI 0.84-1.37).

261

### 262 **Aspirin/naproxen/ibuprofen and neonatal outcomes**

263 Consumption of at least one analgesic from aspirin, naproxen or ibuprofen during  
264 pregnancy was compared against the same control group of pregnancies where no  
265 analgesic was used (Table 2). Again, when comparing associations between groups  
266 in this sub-group analysis and main analysis, fewer outcome variants showed similar  
267 significance pattern. The only shared significant associations were for increased  
268 odds for premature delivery (aOR=1.42, 95%CI 1.08-1.86), stillbirth (aOR=2.34,  
269 95%CI 1.29-4.25) and baby admission to neonatal unit (aOR=1.54, 95%CI 1.22-  
270 1.94) in the adjusted regression analyses.

271

### 272 **Diclofenac and neonatal outcomes**

273 In the sub-group analysis of pregnancies coinciding with non-prescription, over-the-  
274 counter, availability of diclofenac (years 2005-2015) were considered, and outcomes  
275 compared between the diclofenac group and no analgesic consumption group (Table  
276 3). Compared to the main analysis, diclofenac consumption during pregnancy was  
277 not significantly associated with premature delivery (aOR=1.10, 95%CI 0.99-1.22),  
278 neonatal death (aOR=1.26, 95%CI 0.73-2.15) and APGAR score <7 in one minute  
279 (aOR=0.93, 95%CI 0.83-1.04) in the adjusted models. Associations with APGAR  
280 score <7 in five minutes (aOR=0.94, 95%CI 0.72-1.23), cryptorchidism (aOR=1.05,  
281 95%CI 0.78-1.42), amniotic band defects (aOR=0.81, 95%CI 0.41-1.58) and  
282 gastroschisis (aOR=2.93, 95%CI 0.97-8.88) were no longer significant in both crude

1  
2  
3 283 and adjusted analyses. Maternal consumption of diclofenac was independently  
4  
5 284 associated with a significant decrease in stillbirth (aOR=0.59, 95%CI 0.41-0.87). It is  
6  
7  
8 285 also interesting to note that diclofenac was the only sub-group analysis agreeing with  
9  
10 286 the main analysis (exposure to at least one analgesic) on the significance of  
11  
12 287 exposure association with increased incidence of neural tube defects (aOR=3.62,  
13  
14 288 95%CI 1.95-6.74) and hypospadias (aOR=1.49, 95%CI 1.09-2.03) compared to  
15  
16  
17 289 unexposed pregnancies in adjusted models. As most of the outcomes studied were  
18  
19 290 relatively rare the numbers needed to harm were mostly more than 100. Preterm  
20  
21 291 birth, low birthweight and admission to the neonatal unit were exceptions with NNH  
22  
23  
24 292 ranging from 15 to 38. (Tables S1 and S2).  
25  
26  
27  
28  
29  
30  
31  
32  
33  
34  
35  
36  
37  
38  
39  
40  
41  
42  
43  
44  
45  
46  
47  
48  
49  
50  
51  
52  
53  
54  
55  
56  
57  
58  
59  
60

## 293 Discussion

### 294 Main Findings

295 Consumption of paracetamol, ibuprofen, aspirin and naproxen during pregnancy,  
296 either in combination or separately, was significantly associated with increased  
297 premature delivery, stillbirth, neonatal death, LBW, abnormal standardised  
298 birthweight score and more frequent admission to neonatal unit. Consumption of  
299 paracetamol alone was further associated with higher odds for APGAR score <7 at  
300 one and five minutes both in crude and adjusted analyses. There was a dramatic  
301 increase in the frequency of over-the-counter (non-prescription) analgesic use in  
302 pregnancies between 1985 and 2015, reaching 70.5% of women using those  
303 compounds in the final decade of our study. This means that our findings are  
304 applicable far beyond the percentage (between 14% and 38%)<sup>25</sup> of pregnant women  
305 with underlying health deficits related to the adverse outcomes we report here.

306

307 Diclofenac use increased steeply from 2005 (Figure 2A), which reflects the change in  
308 Scottish legislation, leading to diclofenac becoming available without prescription in  
309 that year. Diclofenac use was associated with fewer adverse outcomes but showed  
310 increased risk of neural tube defects and hypospadias in male neonates.

311 Furthermore, and surprisingly, exposure to diclofenac only was associated with  
312 significant decrease in the incidence of stillbirth. The reasons for such differences  
313 between the changes in neonatal outcomes following diclofenac consumption  
314 compared with those following use of the other NSAIDS are not clear. The proportion  
315 of women using diclofenac, especially in the last 7 years of our study makes it highly  
316 unlikely to be due to an underlying maternal condition and/or other compounds used

1  
2  
3 317 in combination (e.g. prescriptions) by women taking diclofenac. It is possible that the  
4  
5 318 drug could act directly on fetal development then this difference could also be due to  
6  
7  
8 319 structural and/or mechanistic differences of the compound compared to the other  
9  
10 320 drugs. However, not enough is known about the specific mechanisms of action of the  
11  
12 321 different analgesics studied to conclude further. Overall, comparing our main  
13  
14 322 analysis with all three sub-analyses, it is evident that the most significant differences  
15  
16 323 were observed when paracetamol was taken with at least one other analgesic. This  
17  
18 324 is mostly due to the high number of pregnancies where paracetamol was used,  
19  
20 325 comprising almost 55% of the exposed cases in the main analysis. Most numbers  
21  
22 326 needed to harm for our outcomes (Tables S1 and S2) ranged between 1000 and  
23  
24 327 100, apart from preterm birth, low birth weight and baby admission to neonatal unit,  
25  
26 328 which were 27, 38 and 15 respectively for our main analysis further strengthening  
27  
28 329 observed associations.  
29  
30  
31  
32  
33  
34 330

### 331 **Strengths and Limitations**

332 A major strength of the present study is the large cohort of 151,141 pregnancies over  
333 a 30-year study period from 1985 until 2015, using a robust data source AMND. This  
334 is one of the largest cohorts used in studies examining the effects of analgesic use  
335 during pregnancy. The dataset contains high quality and consistent data from the  
336 geographically defined area of Aberdeen and surrounding district, in the North East  
337 of Scotland, UK. In addition, as Aberdeen Maternity Hospital is the only maternity  
338 hospital serving the area, over 95% of pregnancies in the area are included in the  
339 dataset, considerably minimizing the risk for selection bias. We were able to analyse  
340 maternal consumption data of the five most commonly used analgesics available

1  
2  
3 341 over-the-counter in the UK and most countries, which is not matched in the current  
4  
5 342 literature. The nature of our data allowed for the analysis of analgesics consumed  
6  
7  
8 343 alone or in combination, unlike most existing studies, and this gives our study the  
9  
10 344 added strength of better reflecting real-life consumption patterns<sup>26,27</sup>. We were able  
11  
12 345 to adjust for important confounding factors, relevant to each analysed outcome.  
13  
14 346 Adjustment for maternal deprivation also allowed us to further account for potential  
15  
16 347 unmeasured factors that can influence maternal and neonatal health, which is a  
17  
18  
19 348 major strength of our analysis compared to most studies.

21  
22 349 A potential concern was that women were probably using analgesics to treat some  
23  
24 350 inherent medical condition which in turn could have been the mediating factor for  
25  
26  
27 351 adverse outcomes. However, since these medications are widely available without  
28  
29 352 prescription, this is unlikely to be a factor that affects the findings of this study. This  
30  
31 353 is especially the case during the “diclofenac analysis” covering 2005-2015, where  
32  
33  
34 354 this study presents results on multiple neonatal outcomes for the given cohort. In this  
35  
36 355 way we offer a comprehensive approach to the exploration of associations with *in*  
37  
38 356 *utero* analgesic exposure rather than only focusing on a single outcome of interest.  
39  
40  
41 357 Our data were based on medical notes; however, over-the-counter consumption is  
42  
43 358 self-reported, and details on the timing, duration, dosage, product type (single-  
44  
45 359 ingredient vs combination) and administration type were not available in the  
46  
47  
48 360 database. In addition, the group of pregnancies with aspirin consumption might  
49  
50 361 include use of low-dose aspirin which is recommended to help reduce risk of some  
51  
52 362 pregnancy complications and outcomes related to placental function. Most women  
53  
54 363 had their first antenatal clinic visit during the 1<sup>st</sup> pregnancy trimester, which might  
55  
56  
57 364 imply our results were affected by primarily 1<sup>st</sup> trimester exposure, although  
58  
59 365 analgesic use in first trimester is most likely replicated in the rest of pregnancy.

1  
2  
3 366 Complete case analyses were performed ignoring pregnancies with missing data in  
4  
5 367 the covariates, however due to the low number of missing data there is little chance  
6  
7 368 that this might have affected the validity of our results. Compared to our cohort size,  
8  
9 369 there were, overall, very few cases of cryptorchidism, neural tube defects, amniotic  
10  
11 370 band defects, hypospadias and gastroschisis, resulting in potentially underpowered  
12  
13 371 statistical analyses to detect a difference for these outcomes. Our study only  
14  
15 372 considered neonatal health outcomes and follow-up of the offspring was not  
16  
17 373 available at this time.  
18  
19  
20  
21  
22 374

## 25 375 **Interpretation**

26  
27  
28 376 Previous literature has considered fewer outcomes with fewer analgesic  
29  
30 377 combinations compared to our study. Consistent with our results, increased risk of  
31  
32 378 preterm birth and miscarriage has been associated with analgesic consumption  
33  
34 379 during pregnancy<sup>28-31</sup>, while others reported no associations with miscarriage,  
35  
36 380 stillbirth or preterm delivery<sup>20,28,29,32</sup>. Similarly, increased risk for offspring  
37  
38 381 cryptorchidism, hypospadias, neural tube defects, amniotic band defects and  
39  
40 382 gastroschisis have been shown by many studies<sup>7-9,33-40</sup>, although, again, a lack of  
41  
42 383 associations with major birth defects have been reported<sup>13-17,41,42</sup>. Compared to our  
43  
44 384 analysis, all these studies used a smaller cohort, considered a shorter study time  
45  
46 385 and there was frequent disagreement with respect to the choices of adjusted  
47  
48 386 confounding factors. Another difference is that maternal questionnaires/interviews  
49  
50 387 were frequently the method of choice to evaluate maternal consumption. Some of  
51  
52 388 the studies reported increased risks for specific pregnancy trimesters which is  
53  
54 389 something our study could not evaluate. Differences in study design and adjustment  
55  
56  
57  
58  
59  
60



1  
2  
3 390 for different confounders might also account for the disagreement of our results that  
4  
5 391 provide a more accurate assessment. Our study is one of the largest in terms of  
6  
7  
8 392 cohort size, duration, number of analgesics and range of outcomes included which  
9  
10 393 might also contribute to differences compared to other studies.

11  
12  
13 394 The literature currently reports conflicting evidence, limiting our ability for definite  
14  
15 395 decision-making. Over-the-counter analgesics are recommended to women by  
16  
17 396 healthcare professionals in order to deal with pregnancy symptoms and other  
18  
19 397 conditions. Policy-makers have taken a stand on the topic, either being reassuring  
20  
21 398 about over-the-counter use during pregnancy or recommending caution when  
22  
23 399 consumption is necessary<sup>43–46</sup>. Different compounds can affect the mother and the  
24  
25 400 fetus in a different way, and their combined use might worsen the risk for offspring ill  
26  
27 401 health. This study demonstrates the need for additional research, before the field can  
28  
29 402 be confidently directed towards one direction or the other.

30  
31  
32  
33  
34 403 Whether the associations we report result from flu, fever, rheumatological or  
35  
36 404 inflammatory conditions, and/or combination with other prescribed medications or  
37  
38 405 solely related to over-the-counter analgesics consumption is a matter of further  
39  
40 406 research. Underlying health conditions could well influence the outcomes we see in  
41  
42 407 this study, however, as these could be very different conditions it is biologically  
43  
44 408 unlikely that they are responsible for the effects we observe here. Our study  
45  
46 409 demonstrates an association of maternal over-the-counter analgesic consumption  
47  
48 410 during pregnancy with adverse neonatal offspring outcomes. Future collaborative  
49  
50 411 approaches such as an individual patient data meta-analysis that includes follow-up  
51  
52 412 data on long-term outcomes during childhood and adulthood would significantly  
53  
54 413 inform decision making. Going forward, uncovering the mechanisms of action and off  
55  
56 414 target effects will also provide a solid foundation for the development of pregnancy-

1  
2  
3 415 safe compounds. Finally, the findings present here suggest that diclofenac is  
4  
5 416 associated with fewer changes in risk for the more frequent adverse outcomes  
6  
7 417 although it is associated more with rarer, but severe, negative outcomes, including  
8  
9 418 neural tube defects. Diclofenac may have a lower risk for the main adverse neonatal  
10  
11 419 outcomes reported for paracetamol. However, it should be noted that our study is not  
12  
13 420 designed to specifically test differences in level of risk between the analgesics  
14  
15 421 included. Therefore, it should be emphasised that this does not mean that the  
16  
17 422 authors are stating that diclofenac is preferable to paracetamol.  
18  
19  
20  
21  
22  
23  
24

423

## 424 **Conclusions**

425 Pain control is currently a therapeutic priority during pregnancy. Our findings of  
426 increased risk of adverse health outcomes for the offspring following at least first  
427 trimester maternal use of readily available over-the-counter analgesics are crucial to  
428 information for the management of pain during pregnancy.

429

430 **Acknowledgements:** N/A

431 **Disclosure of interests:** Professor David Hay is a founder, director and shareholder  
432 in Stemnovate Limited. The remaining authors have no interests to disclose.

433 **Contribution to Authorship:** AZ, SB and PAF contributed to the conception, design  
434 and coordination of the research. EAR provided critical input in the design and  
435 planning of statistical analysis. AZ conducted the statistical analysis and prepared  
436 the manuscript, figures and tables. AZ, SB, PAF, RTM and DCH substantially  
437 contributed to the analysis and interpretation of the work. All authors contributed to

1  
2  
3 438 critical discussion of intellectual content, development and review/approval of the  
4  
5  
6 439 final manuscript version.  
7

8  
9 440 **Funding:** This work is supported by the Biotechnology and Biological Sciences  
10  
11 441 Research council (BBSRC) funding the lead author under the EASTBIO doctoral  
12  
13 442 training programme and to PAF, the EU Horizon 2020 project FREIA (Grant Number  
14  
15 443 825100). RTM is supported by MRC Centre for Reproductive Health Grant  
16  
17 444 MR/N022556/1. The funders had no role in study design, data collection, data  
18  
19 445 analysis, decision to publish, or manuscript preparation.  
20  
21  
22

23 446 **Ethics Statement:** The AMND dataset used in this study was fully anonymised,  
24  
25 447 therefore there was no requirement for ethical approval. The North of Scotland  
26  
27 448 Research Ethics Service has devolved Caldicott approval to the Chair of the AMND  
28  
29 449 steering committee. Approval to access and analyse data was obtained from the  
30  
31 450 AMND steering Committee (AMND 004/2018).  
32  
33  
34

35 451 **Data Availability Statement:** No additional data available.  
36  
37  
38  
39  
40  
41  
42  
43  
44  
45  
46  
47  
48  
49  
50  
51  
52  
53  
54  
55  
56  
57  
58  
59  
60

452 **References**

- 1  
2  
3  
4  
5  
6 453 1. Gendron M-P, Martin B, Oraichi D, Berard A. Health care providers' requests  
7  
8 454 to Teratogen Information Services on medication use during pregnancy and  
9  
10 455 lactation. *Eur J Clin Pharmacol*. 2009;65(5):523-531.  
11  
12  
13 456 2. Mitchell AA, Gilboa SM, Werler MM, Kelley KE, Louik C, Hernández-Díaz S.  
14  
15 Medication use during pregnancy, with particular focus on prescription drugs:  
16 457 1976-2008. *Am J Obstet Gynecol*. 2011;205(1):51.e1-51.e8.  
17  
18 458  
19  
20  
21 459 3. Werler MM, Mitchell AA, Hernandez-Diaz S, Honein MA. Use of over-the-  
22  
23 460 counter medications during pregnancy. *Am J Obstet Gynecol*.  
24  
25 461 2005;193(3):771-777.  
26  
27  
28 462 4. Glover DD, Amonkar M, Rybeck BF, Tracy TS. Prescription, over-the-counter,  
29  
30 463 and herbal medicine use in a rural, obstetric population. *Am J Obstet Gynecol*.  
31  
32 464 2003;188(4):1039-1045.  
33  
34  
35  
36 465 5. Lupattelli A, Spigset O, Twigg MJ, et al. Medication use in pregnancy: A cross-  
37  
38 466 sectional, multinational web-based study. *BMJ Open*. 2014;4(2).  
39  
40  
41 467 6. Zafeiri A, Mitchell RT, Hay DC, Fowler PA. Over-the-counter analgesics during  
42  
43 468 pregnancy: a comprehensive review of global prevalence and offspring safety.  
44  
45 469 *Hum Reprod Update*. Published online October 29, 2020.  
46  
47  
48  
49 470 7. Lynberg MC, Khoury MJ, Lu X, Cocian T. Maternal flu, fever, and the risk of  
50  
51 471 neural tube defects: A population-based case-control study. *Am J Epidemiol*.  
52  
53 472 1994;140(3):244-255.  
54  
55  
56 473 8. Werler MM, Louik C, Mitchell AA. Epidemiologic analysis of maternal factors  
57  
58 474 and amniotic band defects. *Birth Defects Res Part A - Clin Mol Teratol*.

- 1  
2  
3 475 2003;67(1):68-72.  
4  
5  
6 476 9. Snijder CA, Kortenkamp A, Steegers EAP, et al. Intrauterine exposure to mild  
7  
8 477 analgesics during pregnancy and the occurrence of cryptorchidism and  
9  
10 478 hypospadias in the offspring: The Generation R Study. *Hum Reprod*.  
11  
12 2012;27(4):1191-1201.  
13 479  
14  
15  
16 480 10. Lind JN, Tinker SC, Broussard CS, et al. Maternal medication and herbal use  
17  
18 481 and risk for hypospadias: Data from the National Birth Defects Prevention  
19  
20 482 Study, 1997-2007. *Pharmacoepidemiol Drug Saf*. 2013;22(7):783-793.  
21  
22  
23  
24 483 11. Interrante JD, Ailes EC, Lind JN, et al. Risk comparison for prenatal use of  
25  
26 484 analgesics and selected birth defects, National Birth Defects Prevention Study  
27  
28 485 1997–2011. *Ann Epidemiol*. 2017;27(10):645-653.e2.  
29  
30  
31 486 12. Philippat C, Gorgis-Allemand L, Chevrier C, et al. Analgesics during pregnancy  
32  
33 487 and undescended testis. *Epidemiology*. 2011;22(5):747-749.  
34  
35  
36 488 13. Hernandez RK, Werler MM, Romitti P, Sun L, Anderka M. Nonsteroidal  
37  
38 489 antiinflammatory drug use among women and the risk of birth defects. In:  
39  
40 490 *American Journal of Obstetrics and Gynecology*. Vol 206. Mosby Inc.;  
41  
42 491 2012:228.e1-228.e8.  
43  
44  
45  
46 492 14. Cassina M, De Santis M, Cesari E, et al. First trimester diclofenac exposure  
47  
48 493 and pregnancy outcome. *Reprod Toxicol*. 2010;30(3):401-404.  
49  
50  
51 494 15. Padberg S, Tissen-Diabaté T, Dathe K, et al. Safety of diclofenac use during  
52  
53 495 early pregnancy: A prospective observational cohort study. *Reprod Toxicol*.  
54  
55 496 2018;77:122-129.  
56  
57  
58  
59 497 16. van Gelder MMHJ, Roeleveld N, Nordeng H. Exposure to non-steroidal anti-  
60

- 1  
2  
3 498 inflammatory drugs during pregnancy and the risk of selected birth defects: A  
4  
5 499 prospective cohort study. *PLoS One*. 2011;6(7).  
6  
7  
8 500 17. Dathe K, Fietz AK, Pritchard LW, et al. No evidence of adverse pregnancy  
9  
10 501 outcome after exposure to ibuprofen in the first trimester – Evaluation of the  
11  
12 502 national Embryotox cohort. *Reprod Toxicol*. 2018;79:32-38.  
13  
14  
15 503 18. Pariente G, Leibson T, Carls A, Adams-Webber T, Ito S, Koren G. Pregnancy-  
16  
17 504 Associated Changes in Pharmacokinetics: A Systematic Review. Chappell LC,  
18  
19 505 ed. *PLoS Med*. 2016;13(11):e1002160.  
20  
21  
22 506 19. McElhatton PR, Sullivan FM, Volans GN. Paracetamol overdose in pregnancy  
23  
24 507 analysis of the outcomes of 300 cases referred to the teratology information  
25  
26 508 service. *Reprod Toxicol*. 1997;11(1):85-94.  
27  
28  
29 509 20. Kozer E, Costei AM, Boskovic R, Nulman I, Nikfar S, Koren G. Effects of  
30  
31 510 aspirin consumption during pregnancy on pregnancy outcomes: Meta-analysis.  
32  
33 511 *Birth Defects Res Part B - Dev Reprod Toxicol*. 2003;68(1):70-84.  
34  
35  
36 512 21. Nitsche JF, Patil AS, Langman LJ, et al. Transplacental Passage of  
37  
38 513 Acetaminophen in Term Pregnancy. *Am J Perinatol*. 2017;34(6):541-543.  
39  
40  
41 514 22. Ayorinde AA, Wilde K, Lemon J, Campbell D, Bhattacharya S. Data resource  
42  
43 515 profile: The Aberdeen Maternity and Neonatal Databank (AMND). *Int J*  
44  
45 516 *Epidemiol*. 2016;45(2):389-394.  
46  
47  
48 517 23. Campbell D, Hall M, Lemon J, Carr-Hill R, Pritchard C, Samphier M. Clinical  
49  
50 518 birthweight standards for a total population in the 1980s. *BJOG An Int J Obstet*  
51  
52 519 *Gynaecol*. 1993;100(5):436-445.  
53  
54  
55 520 24. Textor J, van der Zander B, Gilthorpe MS, Liśkiewicz M, Ellison GT. Robust  
56  
57  
58  
59  
60

- 1  
2  
3 521 causal inference using directed acyclic graphs: The R package “dagitty.” *Int J*  
4  
5 522 *Epidemiol.* 2016;45(6):1887-1894.  
6  
7  
8 523 25. Royal College of Obstetricians and Gynaecologists. RCOG review clarifies  
9 pain relief options for women during pregnancy and breastfeeding. Published  
10 524 2018. [https://www.rcog.org.uk/en/news/new-rcog-review-clarifies-pain-relief-](https://www.rcog.org.uk/en/news/new-rcog-review-clarifies-pain-relief-options-for-women-during-pregnancy-and-breastfeeding/)  
11 525 [options-for-women-during-pregnancy-and-breastfeeding/](https://www.rcog.org.uk/en/news/new-rcog-review-clarifies-pain-relief-options-for-women-during-pregnancy-and-breastfeeding/)  
12 526  
13  
14  
15 527 26. Sarganas G, Buttery AK, Zhuang W, et al. Prevalence, trends, patterns and  
16 528 associations of analgesic use in Germany. *BMC Pharmacol Toxicol.*  
17 529 2015;16(1).  
18  
19  
20 530 27. Hider-Mlynarz K, Cavalié P, Maison P. Trends in analgesic consumption in  
21 531 France over the last 10 years and comparison of patterns across Europe. *Br J*  
22 532 *Clin Pharmacol.* 2018;84(6):1324-1334.  
23  
24  
25 533 28. Rebordosa C, Kogevinas M, Bech BH, Sørensen HT, Olsen J. Use of  
26 534 acetaminophen during pregnancy and risk of adverse pregnancy outcomes. *Int*  
27 535 *J Epidemiol.* 2009;38(3):706-714.  
28  
29  
30 536 29. Nielsen GL, Sørensen HT, Larsen H, Pedersen L. Risk of adverse birth  
31 537 outcome and miscarriage in pregnant users of non-steroidal anti-inflammatory  
32 538 drugs: Population based observational study and case-control study. *Br Med J.*  
33 539 2001;322(7281):266-270.  
34  
35  
36 540 30. Czeizel AE, Dudá I, Puhó E. Short-term paracetamol therapy during pregnancy  
37 541 and a lower rate of preterm birth. *Paediatr Perinat Epidemiol.* 2005;19(2):106-  
38 542 111.  
39  
40  
41 543 31. Li Z, Ren A, Liu J, et al. Maternal flu or fever, medication use, and neural tube  
42  
43  
44  
45  
46  
47  
48  
49  
50  
51  
52  
53  
54  
55  
56  
57  
58  
59  
60

- 1  
2  
3 544 defects: A population-based case-control study in northern China. *Birth*  
4  
5 545 *Defects Res Part A - Clin Mol Teratol.* 2007;79(4):295-300.  
6  
7  
8 546 32. Pastore LM, Hertz-Picciotto I, Beaumont JJ. Risk of stillbirth from medications,  
9  
10 547 illnesses and medical procedures. *Paediatr Perinat Epidemiol.* 1999;13(4):421-  
11  
12 548 430.  
13  
14  
15 549 33. Kozer E, Nikfar S, Costei A, Boskovic R, Nulman I, Koren G. Aspirin  
16  
17 550 consumption during the first trimester of pregnancy and congenital anomalies:  
18  
19 551 A meta-analysis. *Am J Obstet Gynecol.* 2002;187(6):1623-1630.  
20  
21  
22 552 34. Kristensen DM, Hass U, Lesn L, et al. Intrauterine exposure to mild analgesics  
23  
24 553 is a risk factor for development of male reproductive disorders in human and  
25  
26 554 rat. *Hum Reprod.* 2011;26(1):235-244.  
27  
28  
29 555 35. Jensen MS, Rebordosa C, Thulstrup AM, et al. Maternal use of  
30  
31 556 acetaminophen, ibuprofen, and acetylsalicylic acid during pregnancy and risk  
32  
33 557 of cryptorchidism. *Epidemiology.* 2010;21(6):779-785.  
34  
35  
36 558 36. Correy JF, Newman NM, Collins JA, Burrows EA, Burrows RF, Curran JT. Use  
37  
38 559 of prescription drugs in the first trimester and congenital malformations. *Aust N*  
39  
40 560 *Z J Obs Gynaecol.* 1991;31(4):340-344.  
41  
42  
43 561 37. Lind DV, Main KM, Kyhl HB, et al. Maternal use of mild analgesics during  
44  
45 562 pregnancy associated with reduced anogenital distance in sons: A cohort  
46  
47 563 study of 1027 mother-child pairs. *Hum Reprod.* 2017;32(1):223-231.  
48  
49  
50 564 38. Werler MM, Mitchell AA, Shapiro S. First trimester maternal medication use in  
51  
52 565 relation to gastroschisis. *Teratology.* 1992;45(4):361-367.  
53  
54  
55 566 39. Torfs CP, Katz EA, Bateson TF, Lam PK, Curry CJR. Maternal medications  
56  
57  
58  
59  
60



- 1  
2  
3 567 and environmental exposures as risk factors for gastroschisis. *Teratology*.  
4  
5 568 1996;54(2):84-92.  
6  
7  
8 569 40. M. Werler M, Sheehan JE, Mitchell AA. Maternal medication use and risks of  
9  
10 570 gastroschisis and small intestinal atresia. *Am J Epidemiol*. 2002;155(1):26-31.  
11  
12  
13 571 41. Slone D, Heinonen OP, Kaufman DW, Siskind V, Monson RR, Shapiro S.  
14  
15 572 ASPIRIN AND CONGENITAL MALFORMATIONS. *Lancet*.  
16  
17 573 1976;307(7974):1373-1375.  
18  
19  
20  
21 574 42. Shaw GM, Todoroff K, Velie EM, Lammer EJ. Maternal illness, including fever,  
22  
23 575 and medication use as risk factors for neural tube defects. *Teratology*.  
24  
25 576 1998;57(1):1-7.  
26  
27  
28 577 43. Mosley II JF, Smith LL, Dezan MD. An overview of upcoming changes in  
29  
30 578 pregnancy and lactation labeling information. *Pharm Pract (Granada)*.  
31  
32 579 2015;13(2):605.  
33  
34  
35  
36 580 44. SMFM (Society for Maternal-Fetal Medicine Publications Committee). Prenatal  
37  
38 581 acetaminophen use and outcomes in children. *Am J Obstet Gynecol*.  
39  
40 582 2017;216(3):B14-B15.  
41  
42  
43  
44 583 45. Bisson DL, Newell SD, Laxton C. Antenatal and Postnatal Analgesia: Scientific  
45  
46 584 Impact Paper No. 59. *BJOG An Int J Obstet Gynaecol*. 2018;(59).  
47  
48  
49 585 46. RCOG. RCOG review clarifies pain relief options for women during pregnancy  
50  
51 586 and breastfeeding. Published 2018. [https://www.rcog.org.uk/en/news/new-](https://www.rcog.org.uk/en/news/new-rcog-review-clarifies-pain-relief-options-for-women-during-pregnancy-and-breastfeeding/)  
52  
53 587 [rcog-review-clarifies-pain-relief-options-for-women-during-pregnancy-and-](https://www.rcog.org.uk/en/news/new-rcog-review-clarifies-pain-relief-options-for-women-during-pregnancy-and-breastfeeding/)  
54  
55 588 [breastfeeding/](https://www.rcog.org.uk/en/news/new-rcog-review-clarifies-pain-relief-options-for-women-during-pregnancy-and-breastfeeding/)  
56  
57  
58  
59  
60

1  
2  
3  
4  
5  
6  
7  
8  
9  
10  
11  
12  
13  
14  
15  
16  
17  
18  
19  
20  
21  
22  
23  
24  
25  
26  
27  
28  
29  
30  
31  
32  
33  
34  
35  
36  
37  
38  
39  
40  
41  
42  
43  
44  
45  
46

For peer review only

**Table 2.** Comparison of offspring outcomes between control (no analgesic) and groups exposed to at least one analgesic, only paracetamol, and at least one from ibuprofen, aspirin, naproxen.

| Outcomes                                    | No analgesic<br>(n=107,143)<br>n (%) | At least one<br>analgesic<br>(n=43,998)<br>n (%) | Crude<br>OR (CI 95%)    | Adjusted<br>OR (95% CI)                | Paracetamol<br>(n=24,099)<br>n (%) | Crude<br>OR (95% CI)          | Adjusted<br>OR (95% CI)                  | Ibu/Asp/Na<br>pr<br>(n=762)<br>n (%) | Crude<br>OR (95% CI)        | Adjusted<br>OR (95% CI)                 |
|---------------------------------------------|--------------------------------------|--------------------------------------------------|-------------------------|----------------------------------------|------------------------------------|-------------------------------|------------------------------------------|--------------------------------------|-----------------------------|-----------------------------------------|
| <b>Gestation at delivery (weeks)</b>        |                                      |                                                  |                         |                                        |                                    |                               |                                          |                                      |                             |                                         |
| >=37                                        | 100,879 (94.2)                       | 39,838 (90.5)                                    | 1.00                    | 1.00                                   | 21,589 (89.6)                      | 1.00                          | 1.00                                     | 697 (91.5)                           | 1.00                        | 1.00                                    |
| <37                                         | 6,264 (5.8)                          | 4,160 (9.5)                                      | <b>1.68 (1.61-1.75)</b> | <b>1.50 (1.43-1.58)<sup>a</sup></b>    | 2,510 (10.4)                       | <b>1.87 (1.78-1.97)</b>       | <b>1.56 (1.48-1.65)<sup>a</sup></b>      | 65 (8.5)                             | <b>1.50 (1.16-1.94)</b>     | <b>1.42 (1.08-1.86)<sup>a</sup></b>     |
| <b>Pregnancy outcome</b>                    |                                      |                                                  |                         |                                        |                                    |                               |                                          |                                      |                             |                                         |
| Livebirth                                   | 105,949 (98.9)                       | 43,407 (98.7)                                    | 1.00                    | 1.00                                   | 23,704 (98.4)                      | 1.00                          | 1.00                                     | 747 (98.0)                           | 1.00                        | 1.00                                    |
| Stillbirth                                  | 803 (0.7)                            | 405 (0.9)                                        | <b>1.23 (1.09-1.39)</b> | <b>1.33 (1.15-1.54)<sup>a</sup></b>    | 275 (1.1)                          | <b>1.53 (1.33-1.76)</b>       | <b>1.52 (1.30-1.77)<sup>a</sup></b>      | 13 (1.7)                             | <b>2.30 (1.32-3.99)</b>     | <b>2.34 (1.29-4.25)<sup>a</sup></b>     |
| Neonatal<br>Death                           | 373 (0.3)                            | 182 (0.4)                                        | 1.19 (0.99-1.42)        | <b>1.56 (1.27-1.93)<sup>a</sup></b>    | 117 (0.5)                          | <b>1.40 (1.14-1.73)</b>       | <b>1.56 (1.24-1.96)<sup>a</sup></b>      | 2 (0.3)                              | 0.76 (0.19-3.06)            | 0.93 (0.23-3.74) <sup>a</sup>           |
| Missing                                     | 18 (<0.1)                            | 4 (<0.1)                                         | n/a                     | n/a                                    | 3 (<0.1)                           | n/a                           | n/a                                      | 0 (0.0)                              | n/a                         | n/a                                     |
| <b>Weight of baby (grams)</b>               |                                      |                                                  |                         |                                        |                                    |                               |                                          |                                      |                             |                                         |
| NBW                                         | 87,966 (82.1)                        | 34,555 (78.6)                                    | 1.00                    | 1.00                                   | 19,163 (79.5)                      | 1.00                          | 1.00                                     | 605 (79.5)                           | 1.00                        | 1.00                                    |
| LBW                                         | 5,910 (5.5)                          | 3,571 (8.1)                                      | <b>1.54 (1.47-1.61)</b> | <b>1.28 (1.20-1.37)<sup>b</sup></b>    | 2,213 (9.2)                        | <b>1.72 (1.63-1.81)</b>       | <b>1.60 (1.51-1.69)<sup>b</sup></b>      | 59 (7.7)                             | <b>1.45 (1.11-1.90)</b>     | 1.29 (0.91-1.83) <sup>b</sup>           |
| HBW                                         | 13,233 (12.4)                        | 5,863 (13.3)                                     | <b>1.13 (1.09-1.17)</b> | <b>1.09 (1.05-1.13)<sup>b</sup></b>    | 2,720 (11.3)                       | <b>0.94 (0.90-0.99)</b>       | 0.98 (0.93-1.02) <sup>b</sup>            | 97 (12.7)                            | 1.07 (0.86-1.32)            | 0.99 (0.80-1.24) <sup>b</sup>           |
| Missing                                     | 34 (<0.1)                            | 9 (<0.1)                                         | n/a                     | n/a                                    | 3 (<0.1)                           | n/a                           | n/a                                      | 1 (0.1)                              | n/a                         | n/a                                     |
| <b>Standardised Birthweight Score§</b>      |                                      |                                                  |                         |                                        |                                    |                               |                                          |                                      |                             |                                         |
| Mean (SD)                                   | 0.001 (0.003)                        | -0.002 (0.065)                                   | <b>0.03 (0.02-0.04)</b> | <b>0.046 (0.032-0.059)<sup>c</sup></b> | 0.001 (0.991)                      | <b>-0.04 (-0.058- -0.029)</b> | <b>-0.014 (-0.029-0.001)<sup>c</sup></b> | 0.046 (0.038)                        | <b>0.045 (-0.029-0.119)</b> | <b>0.049 (-0.025-0.123)<sup>c</sup></b> |
| <b>Admitted to neonatal unit</b>            |                                      |                                                  |                         |                                        |                                    |                               |                                          |                                      |                             |                                         |
| No                                          | 62,378 (58.2)                        | 32,391 (73.6)                                    | 1.00                    | 1.00                                   | 16,342 (67.8)                      | 1.00                          | 1.00                                     | 480 (63.0)                           | 1.00                        | 1.00                                    |
| Yes                                         | 11,011 (10.3)                        | 7,448 (16.9)                                     | <b>1.30 (1.26-1.35)</b> | <b>1.57 (1.51-1.64)<sup>b</sup></b>    | 3,956 (16.4)                       | <b>1.37 (1.32-1.43)</b>       | <b>1.45 (1.38-1.53)<sup>b</sup></b>      | 117 (15.4)                           | <b>1.38 (1.13-1.69)</b>     | <b>1.54 (1.22-1.94)<sup>b</sup></b>     |
| Missing                                     | 33,754 (31.5)                        | 4,159 (9.5)                                      | n/a                     | n/a                                    | 3,801 (15.8)                       | n/a                           | n/a                                      | 762 (21.7)                           | n/a                         | n/a                                     |
| <b>APGAR score at 1 min</b>                 |                                      |                                                  |                         |                                        |                                    |                               |                                          |                                      |                             |                                         |
| Normal                                      | 92,217 (86.1)                        | 38,224 (86.9)                                    | 1.00                    | 1.00                                   | 20,593 (85.5)                      | 1.00                          | 1.00                                     | 659 (86.5)                           | 1.00                        | 1.00                                    |
| <7                                          | 14,335 (13.4)                        | 5,674 (12.9)                                     | <b>0.96 (0.92-0.99)</b> | <b>1.18 (1.13-1.23)<sup>d</sup></b>    | 3,437(14.3)                        | <b>1.07 (1.03-1.12)</b>       | <b>1.23 (1.18-1.28)<sup>d</sup></b>      | 101 (13.3)                           | 0.99 (0.80-1.22)            | 1.07 (0.86-1.32) <sup>d</sup>           |
| Missing                                     | 591 (0.6)                            | 100 (0.2)                                        | n/a                     | n/a                                    | 69 (0.3)                           | n/a                           | n/a                                      | 2 (0.3)                              | n/a                         | n/a                                     |
| <b>APGAR score at 5 min</b>                 |                                      |                                                  |                         |                                        |                                    |                               |                                          |                                      |                             |                                         |
| Normal                                      | 104,292 (97.3)                       | 42,730 (97.1)                                    | 1.00                    | 1.00                                   | 23,334 (96.8)                      | 1.00                          | 1.00                                     | 738 (96.9)                           | 1.00                        | 1.00                                    |
| <7                                          | 2,216 (2.1)                          | 1,163 (2.6)                                      | <b>1.28 (1.19-1.38)</b> | <b>1.48 (1.35-1.62)<sup>d</sup></b>    | 690 (2.9)                          | <b>1.39 (1.28-1.52)</b>       | <b>1.53 (1.40-1.68)<sup>d</sup></b>      | 21 (2.8)                             | 1.34 (0.87-2.07)            | 1.52 (0.97-2.36) <sup>d</sup>           |
| Missing                                     | 635 (0.6)                            | 105 (0.2)                                        | n/a                     | n/a                                    | 75 (0.3)                           | n/a                           | n/a                                      | 3 (0.4)                              | n/a                         | n/a                                     |
| <b>Cryptorchidism (only males included)</b> |                                      |                                                  |                         |                                        |                                    |                               |                                          |                                      |                             |                                         |
| No                                          | 54,509 (99.3)                        | 22,616 (99.0)                                    | 1.00                    | 1.00                                   | 12,247 (99.1)                      | 1.00                          | 1.00                                     | 394 (99.4)                           | 1.00                        | 1.00                                    |
| Yes                                         | 357 (0.7)                            | 236 (1.0)                                        | <b>1.59 (1.35-1.88)</b> | 0.92 (0.77-1.11) <sup>b</sup>          | 107 (0.9)                          | <b>1.33 (1.07-1.66)</b>       | 0.87 (0.69-1.09) <sup>b</sup>            | 1 (0.3)                              | 0.39 (0.05-2.77)            | 0.28 (0.04-1.98) <sup>b</sup>           |
| <b>Neural Tube Defects</b>                  |                                      |                                                  |                         |                                        |                                    |                               |                                          |                                      |                             |                                         |

1  
2  
3  
4  
5  
6  
7  
8  
9  
10  
11  
12  
13  
14  
15  
16  
17  
18  
19  
20  
21  
22  
23  
24  
25  
26  
27  
28  
29  
30  
31  
32  
33  
34  
35  
36  
37  
38  
39  
40  
41  
42  
43  
44  
45  
46

|                                          |                 |                |                         |                                     |                |                         |                               |             |                         |                               |
|------------------------------------------|-----------------|----------------|-------------------------|-------------------------------------|----------------|-------------------------|-------------------------------|-------------|-------------------------|-------------------------------|
| No                                       | 107,093 (99.9)  | 43,928 (99.8)  | 1.00                    | 1.00                                | 24,077 (99.9)  | 1.00                    | 1.00                          | 762 (100)   | 1.00                    | 1.00                          |
| Yes                                      | 50 (0.1)        | 70 (0.2)       | <b>3.41 (2.37-4.91)</b> | <b>1.64 (1.08-2.47)<sup>b</sup></b> | 22 (0.1)       | <b>1.96 (1.19-3.23)</b> | 1.21 (0.71-2.06) <sup>b</sup> | 0 (0.0)     | n/a                     | n/a                           |
| <b>Amniotic Band Defects</b>             |                 |                |                         |                                     |                |                         |                               |             |                         |                               |
| No                                       | 107,053 (99.9)  | 43,936 (99.9)  | 1.00                    | 1.00                                | 24,070 (99.9)  | 1.00                    | 1.00                          | 760 (99.7)  | 1.00                    | 1.00                          |
| Yes                                      | 90 (0.1)        | 62 (0.1)       | <b>1.68 (1.21-2.32)</b> | 1.02 (0.71-1.47) <sup>b</sup>       | 29 (0.1)       | 1.43 (0.94-2.18)        | 0.98 (0.63-1.52) <sup>b</sup> | 2 (0.3)     | 3.13 (0.77-12.73)       | 2.29 (0.56-9.37) <sup>b</sup> |
| <b>Hypospadias (only males included)</b> |                 |                |                         |                                     |                |                         |                               |             |                         |                               |
| No                                       | 54,607 (99.5)   | 22,600 (98.9)  | 1.00                    | 1.00                                | 12,258 (99.2)  | 1.00                    | 1.00                          | 390 (98.7)  | 1.00                    | 1.00                          |
| Yes                                      | 259 (0.3)       | 252 (1.1)      | <b>2.35 (1.98-2.80)</b> | <b>1.27 (1.05-1.54)<sup>b</sup></b> | 96 (0.8)       | <b>1.65 (1.31-2.09)</b> | 1.07 (0.84-1.37) <sup>b</sup> | 5 (1.3)     | <b>2.70 (1.11-6.59)</b> | 1.91 (0.78-4.68) <sup>b</sup> |
| <b>Gastroschisis</b>                     |                 |                |                         |                                     |                |                         |                               |             |                         |                               |
| No                                       | 107,120 (99.9)  | 43,979 (99.9)  | 1.00                    | 1.00                                | 24,089 (99.9)  | 1.00                    | 1.00                          | 762(100)    | 1.00                    | 1.00                          |
| Yes                                      | 23 (0.1)        | 19 (0.1)       | <b>2.01 (1.10-3.70)</b> | 1.10 (0.56-2.20) <sup>b</sup>       | 10 (0.1)       | 1.93 (0.92-4.06)        | 0.99 (0.45-2.21) <sup>b</sup> | 0 (0.0)     | n/a                     | n/a                           |
| <b>At least one outcome*</b>             |                 |                |                         |                                     |                |                         |                               |             |                         |                               |
| No                                       | 106,367 (99.3%) | 43,363 (98.6%) | 1.00                    | 1.00                                | 23,835 (98.9%) | 1.00                    | 1.00                          | 754 (99.0%) | 1.00                    | 1.00                          |
| Yes                                      | 776 (0.7%)      | 635 (1.4%)     | <b>2.01 (1.81-2.23)</b> | 1.12 (0.99-1.26) <sup>b</sup>       | 264 (1.1%)     | <b>1.52 (1.32-1.75)</b> | 0.97 (0.84-1.13) <sup>b</sup> | 8 (1.0%)    | 1.45 (0.72-2.93)        | 1.11 (0.55-2.23) <sup>b</sup> |

591 n/a, not applicable; n, number of pregnancies

592 <sup>a</sup> Adjusted for year of delivery, maternal age at delivery, SIMD, first gestational booking, maternal hypertensive disorders, maternal antepartum

593 haemorrhage

594 <sup>b</sup> Adjusted for year of delivery, maternal age at delivery, SIMD, first gestational booking, gestation at delivery

595 <sup>c</sup> Adjusted for year of delivery, maternal age at delivery, SIMD, first gestational booking

596 <sup>d</sup> Adjusted for year of delivery, maternal age at delivery, SIMD, first gestational booking, type of delivery

597 § Linear regression analysis reporting differences with 95% CI

598 \*Including cryptorchidism, neural tube defects, amniotic band defects, hypospadias, gastroschisis

**Table 3.** Sub-group regression analysis comparing pregnancies unexposed to any analgesic and those exposed to diclofenac (years 2005-2015).

| Outcomes                                    | No analgesic<br>(n=20,544)<br>n (%) | Diclofenac<br>2005-2015<br>(n=10,291)<br>n (%) | Crude<br>OR (CI 95%)        | Adjusted<br>OR (CI 95%)                 |
|---------------------------------------------|-------------------------------------|------------------------------------------------|-----------------------------|-----------------------------------------|
| <b>Gestation at delivery (weeks)</b>        |                                     |                                                |                             |                                         |
| ≥37                                         | 19,407 (94.5%)                      | 9,640 (93.7%)                                  | 1.00                        | 1.00                                    |
| <37                                         | 1,137 (5.5%)                        | 651 (6.3%)                                     | <b>1.15 (1.04, 1.27)</b>    | 1.10 (0.99, 1.22) <sup>a</sup>          |
| <b>Pregnancy outcome</b>                    |                                     |                                                |                             |                                         |
| Livebirth                                   | 20,393 (99.3%)                      | 10,227 (99.4%)                                 | 1.00                        | 1.00                                    |
| Stillbirth                                  | 116 (0.5%)                          | 39 (0.4%)                                      | <b>0.67 (0.47, 0.96)</b>    | <b>0.59 (0.41, 0.87)<sup>a</sup></b>    |
| Neonatal Death                              | 35 (0.2%)                           | 25 (0.2%)                                      | 1.42 (0.85, 2.38)           | 1.26 (0.73, 2.15) <sup>a</sup>          |
| <b>Weight of baby (grams)</b>               |                                     |                                                |                             |                                         |
| NBW                                         | 16,869 (82.1%)                      | 8,116 (78.9%)                                  | 1.00                        | 1.00                                    |
| LBW                                         | 965 (4.7%)                          | 572 (5.6%)                                     | <b>1.23 (1.11, 1.37)</b>    | <b>1.22 (1.07, 1.40)<sup>b</sup></b>    |
| HBW                                         | 2,707 (13.2%)                       | 1,600 (15.5%)                                  | <b>1.23 (1.15, 1.31)</b>    | <b>1.21 (1.13, 1.29)<sup>b</sup></b>    |
| Missing                                     | 3 (0.0%)                            | 3 (0.0%)                                       |                             |                                         |
| <b>Standardised Birthweight Score §</b>     |                                     |                                                |                             |                                         |
|                                             | -0.039 (0.959)                      | 0.132 (1.036)                                  | <b>0.171 (0.145, 0.197)</b> | <b>0.167 (0.141, 0.193)<sup>c</sup></b> |
| <b>Admitted to neonatal unit</b>            |                                     |                                                |                             |                                         |
| No                                          | 18,224 (88.7%)                      | 8,747 (85.0%)                                  | 1.00                        | 1.00                                    |
| Yes                                         | 2,175 (10.6%)                       | 1,492 (14.5%)                                  | <b>1.43 (1.33, 1.53)</b>    | <b>1.46 (1.35, 1.58)<sup>b</sup></b>    |
| Missing                                     | 145 (0.7%)                          | 52 (0.5%)                                      |                             |                                         |
| <b>APGAR score at 1 min</b>                 |                                     |                                                |                             |                                         |
| Normal                                      | 18,709 (91.1%)                      | 9,350 (90.9%)                                  | 1.00                        | 1.00                                    |
| <7                                          | 1,658 (8.1%)                        | 924 (9.0%)                                     | <b>1.12 (1.03, 1.21)</b>    | 0.93 (0.83, 1.04) <sup>d</sup>          |
| Missing                                     | 177 (0.9%)                          | 17 (0.2%)                                      |                             |                                         |
| <b>APGAR score at 5 min</b>                 |                                     |                                                |                             |                                         |
| Normal                                      | 20,065 (97.7%)                      | 10,096 (98.1%)                                 | 1.00                        | 1.00                                    |
| <7                                          | 302 (1.5%)                          | 177 (1.7%)                                     | 0.86 (0.71, 1.04)           | 0.94 (0.72, 1.23) <sup>d</sup>          |
| Missing                                     | 177 (0.9%)                          | 18 (0.2%)                                      |                             |                                         |
| <b>Cryptorchidism (only males included)</b> |                                     |                                                |                             |                                         |
| No                                          | 10,284 (98.7%)                      | 5,314 (98.7%)                                  | 1.00                        | 1.00                                    |
| Yes                                         | 133 (1.3%)                          | 70 (1.3%)                                      | 1.02 (0.76, 1.36)           | 1.05 (0.78, 1.42) <sup>b</sup>          |
| <b>Neural Tube Defects</b>                  |                                     |                                                |                             |                                         |
| No                                          | 20,527 (99.9%)                      | 10,263 (99.7%)                                 | 1.00                        | 1.00                                    |
| Yes                                         | 17 (0.1%)                           | 28 (0.3%)                                      | <b>3.29 (1.80, 6.02)</b>    | <b>3.62 (1.95, 6.74)<sup>b</sup></b>    |
| <b>Amniotic Band Defects</b>                |                                     |                                                |                             |                                         |
| No                                          | 20,514 (99.9%)                      | 10,277 (99.9%)                                 | 1.00                        | 1.00                                    |
| Yes                                         | 30 (0.1%)                           | 14 (0.1%)                                      | 0.93 (0.49, 1.76)           | 0.81 (0.41, 1.58) <sup>b</sup>          |
| <b>Hypospadias (only males included)</b>    |                                     |                                                |                             |                                         |
| No                                          | 10,317 (99.0%)                      | 5,308 (98.6%)                                  | 1.00                        | 1.00                                    |
| Yes                                         | 100 (1.0%)                          | 76 (1.4%)                                      | <b>1.48 (1.09, 1.99)</b>    | <b>1.49 (1.09, 2.03)<sup>b</sup></b>    |
| <b>Gastroschisis</b>                        |                                     |                                                |                             |                                         |
| No                                          | 20,538 (99.9%)                      | 10,284 (99.9%)                                 | 1.00                        | 1.00                                    |
| Yes                                         | 6 (0.1%)                            | 7 (0.1%)                                       | 2.33 (0.78, 6.94)           | 2.93 (0.97, 8.88) <sup>b</sup>          |
| <b>At least one outcome*</b>                |                                     |                                                |                             |                                         |
| No                                          | 20,258 (98.6%)                      | 10,097 (98.1%)                                 | 1.00                        | 1.00                                    |
| Yes                                         | 286 (1.4%)                          | 194 (1.9%)                                     | <b>1.36 (1.13, 1.64)</b>    | <b>1.38 (1.15, 1.67)<sup>b</sup></b>    |

599 n/a, not applicable; n, number of pregnancies

600 <sup>a</sup> Adjusted for year of delivery, maternal age at delivery, SIMD, first gestational booking, maternal  
601 hypertensive disorders, maternal antepartum haemorrhage

602 <sup>b</sup> Adjusted for year of delivery, maternal age at delivery, SIMD, first gestational booking, gestation at  
603 delivery

604 <sup>c</sup> Adjusted for year of delivery, maternal age at delivery, SIMD, first gestational booking

1  
2  
3  
4  
5  
6  
7  
8  
9  
10  
11  
12  
13  
14  
15  
16  
17  
18  
19  
20  
21  
22  
23  
24  
25  
26  
27  
28  
29  
30  
31  
32  
33  
34  
35  
36  
37  
38  
39  
40  
41  
42  
43  
44  
45  
46  
47  
48  
49  
50  
51  
52  
53  
54  
55  
56  
57  
58  
59  
60

605 <sup>d</sup>Adjusted for year of delivery, maternal age at delivery, SIMD, first gestational booking, type of  
606 delivery  
607 <sup>§</sup> Linear regression analysis reporting differences with 95% CI  
608 \*Including cryptorchidism, neural tube defects, amniotic band defects, hypospadias, gastroschisis

For peer review only

1  
2  
3 609 **Figure 1.** Flowchart of cohort selection and sub-group analyses. n=number of  
4  
5 610 pregnancies in each analysis. \*98.3% of pregnancies using only diclofenac occurred  
6  
7 611 during 2005-2015, therefore analysis was performed only on data from that decade  
8  
9 612 to rule out any temporal effect.  
10  
11  
12  
13  
14  
15  
16  
17  
18  
19  
20  
21  
22  
23  
24  
25  
26  
27  
28  
29  
30  
31  
32  
33  
34  
35  
36  
37  
38  
39  
40  
41  
42  
43  
44  
45  
46  
47  
48  
49  
50  
51  
52  
53  
54  
55  
56  
57  
58  
59  
60

For peer review only

1  
2  
3 614 **Figure 2.** Prevalence of use during pregnancy for each analgesic sub-group over our  
4  
5 615 30-year study period. **(A)** Merge graph showing percentage of pregnancies using  
6  
7 616 each analgesic group during pregnancy. **(B)** Percentage of use for at least one  
8  
9 617 analgesic out of ibuprofen, aspirin, naproxen. \*In 2005 there was a change in  
10  
11 618 legislation making diclofenac available without prescription.  
12  
13  
14

15 619  
16  
17  
18  
19  
20  
21  
22  
23  
24  
25  
26  
27  
28  
29  
30  
31  
32  
33  
34  
35  
36  
37  
38  
39  
40  
41  
42  
43  
44  
45  
46  
47  
48  
49  
50  
51  
52  
53  
54  
55  
56  
57  
58  
59  
60

For peer review only



1  
2  
3 620 **Figure S1.** Directed acyclic graph (DAG) of exposure to outcome path and relevant  
4  
5 621 measured and unmeasured biasing factors in our analysis.  
6  
7  
8 622

9  
10  
11  
12  
13  
14  
15  
16  
17  
18  
19  
20  
21  
22  
23  
24  
25  
26  
27  
28  
29  
30  
31  
32  
33  
34  
35  
36  
37  
38  
39  
40  
41  
42  
43  
44  
45  
46  
47  
48  
49  
50  
51  
52  
53  
54  
55  
56  
57  
58  
59  
60

For peer review only

**Table 1.** Comparison of baseline characteristics between exposed (use of analgesics) and unexposed (no analgesic use) groups of pregnancies (P values <0.05 shown in bold).

| Baseline Characteristics        | No analgesic (n=107,143)<br>n (%) | At least one analgesic (n=43,998)<br>n (%) | P value <sup>†</sup> | Paracetamol (n=24,099)<br>n (%) | P value <sup>†</sup> | Ibuprofen/ Aspirin/ Naproxen (n=762)<br>n (%) | P value <sup>†</sup> | No analgesic 2005-2015 (n=20,544)<br>n (%) | Diclofenac 2005-2015 (n=10,291)<br>n (%) | P value <sup>‡</sup> |              |
|---------------------------------|-----------------------------------|--------------------------------------------|----------------------|---------------------------------|----------------------|-----------------------------------------------|----------------------|--------------------------------------------|------------------------------------------|----------------------|--------------|
| <b>Year of delivery</b>         |                                   |                                            |                      |                                 |                      |                                               |                      |                                            |                                          |                      |              |
| 1985-1994                       | 50,152 (46.8)                     | 5,737 (13.0)                               | <b>&lt;0.001</b>     | 5,390 (22.4)                    | <b>&lt;0.001</b>     | 213 (28.0)                                    | <b>&lt;0.001</b>     | n/a                                        | n/a                                      | <b>&lt;0.001</b>     |              |
| 1995-2004                       | 36,447 (34.0)                     | 7,263 (16.5)                               |                      | 6,571 (27.3)                    |                      | 321 (42.1)                                    |                      | n/a                                        | n/a                                      |                      |              |
| 2005-2015 / 2005-2009 *         | 20,544 (19.2)                     | 30,998 (70.5)                              |                      | 12,138 (50.4)                   |                      | 228 (29.9)                                    |                      | n/a                                        | 11,105 (54.1)                            |                      | 4,021 (39.1) |
| 2010-2015 *                     | n/a                               | n/a                                        |                      | n/a                             |                      | n/a                                           |                      | n/a                                        | 9,439 (45.9)                             |                      | 6,270 (60.9) |
|                                 |                                   |                                            |                      |                                 |                      |                                               |                      |                                            |                                          |                      |              |
| <b>Maternal age at delivery</b> |                                   |                                            |                      |                                 |                      |                                               |                      |                                            |                                          |                      |              |
| Younger than 20                 | 9,236 (8.6)                       | 3,834 (8.7)                                | <b>&lt;0.001</b>     | 2,936 (12.2)                    | <b>&lt;0.001</b>     | 34 (4.5)                                      | <b>&lt;0.001</b>     | 1,286 (6.3)                                | 311 (3.0)                                | <b>&lt;0.001</b>     |              |
| 20-25                           | 24,249 (22.6)                     | 8,700 (19.8)                               |                      | 5,932 (24.6)                    |                      | 113 (14.8)                                    |                      | 3,436 (16.7)                               | 1,152 (11.2)                             |                      |              |
| 26-35                           | 63,499 (59.3)                     | 25,367 (57.7)                              |                      | 12,896 (53.5)                   |                      | 464 (60.9)                                    |                      | 12,664 (61.1)                              | 6,628 (64.4)                             |                      |              |
| Older than 35                   | 10,159 (9.5)                      | 6,097 (13.9)                               |                      | 2,335 (9.7)                     |                      | 151 (19.8)                                    |                      | 3,158 (15.4)                               | 2,200 (21.4)                             |                      |              |
|                                 |                                   |                                            |                      |                                 |                      |                                               |                      |                                            |                                          |                      |              |
| <b>Previous Parity</b>          |                                   |                                            |                      |                                 |                      |                                               |                      |                                            |                                          |                      |              |
| Nulliparity (0)                 | 48,684 (45.4)                     | 23,353 (53.1)                              | <b>&lt;0.001</b>     | 12,510 (51.9)                   | <b>&lt;0.001</b>     | 300 (39.4)                                    | <b>0.004</b>         | 8,336 (40.6)                               | 5,004 (48.6)                             | <b>&lt;0.001</b>     |              |
| Multiparity (1-11)              | 58,457 (54.6)                     | 20,639 (46.9)                              |                      | 11,587 (48.1)                   |                      | 462 (60.6)                                    |                      | 12,206 (59.4)                              | 5,284 (51.4)                             |                      |              |
| Missing                         | 2 (<0.1)§                         | 6 (<0.1)§                                  |                      | 2 (<0.1)§                       |                      | 0 (0.0)§                                      |                      | 2 (<0.1)§                                  | 3 (<0.1)§                                |                      |              |
| <b>Maternal BMI</b>             |                                   |                                            |                      |                                 |                      |                                               |                      |                                            |                                          |                      |              |
| Underweight (<18.5)             | 1,998 (2.4)                       | 869 (2.2)                                  | <b>&lt;0.001</b>     | 545 (2.6)                       | <b>&lt;0.001</b>     | 10 (1.5)                                      | <b>0.007</b>         | 492 (2.7)                                  | 174 (1.9)                                | <b>&lt;0.001</b>     |              |
| Normal weight (18.5-24.9)       | 50,127 (60.8)                     | 18,958 (48.8)                              |                      | 10,486 (50.5)                   |                      | 361 (55.)                                     |                      | 10,239 (55.2)                              | 4,671 (50.0)                             |                      |              |
| Overweight (25.0-29.9)          | 20,500 (24.9)                     | 10,960 (28.2)                              |                      | 5,733 (27.6)                    |                      | 192 (29.5)                                    |                      | 4,930 (26.6)                               | 2,630 (28.1)                             |                      |              |
| Obese (≥ 30.0)                  | 9,773 (11.9)                      | 8,046 (20.7)                               |                      | 3,995 (19.2)                    |                      | 88 (13.5)                                     |                      | 2,881 (15.5)                               | 1,871 (20.0)                             |                      |              |
| Missing data                    | 24,745 (23.1)§                    | 5,165 (11.7)§                              |                      | 3,340 (13.9)§                   |                      | 111 (14.6)§                                   |                      | 2,002 (9.7)§                               | 945 (9.2)§                               |                      |              |

| <b>Gestation weeks at earliest antenatal visit</b> |               |               |                  |               |                  |            |                  |               |              |                  |
|----------------------------------------------------|---------------|---------------|------------------|---------------|------------------|------------|------------------|---------------|--------------|------------------|
| 1 <sup>st</sup> Trimester                          | 69,896 (65.4) | 36,789 (83.7) | <b>&lt;0.001</b> | 19,075 (79.2) | <b>&lt;0.001</b> | 569 (75.0) | <b>&lt;0.001</b> | 18,155 (88.4) | 9,185 (89.4) | <b>0.036</b>     |
| 2 <sup>nd</sup> Trimester                          | 29,269 (27.4) | 5,791 (13.2)  |                  | 4,117 (17.1)  |                  | 166 (21.9) |                  | 1,770 (8.6)   | 829 (8.1)    |                  |
| 3 <sup>rd</sup> Trimester                          | 7,741 (7.2)   | 1,376 (3.1)   |                  | 890 (3.7)     |                  | 24 (3.2)   |                  | 605 (2.9)     | 264 (2.6)    |                  |
| Missing                                            | 237 (0.2)§    | 42 (0.1)§     |                  | 17 (0.1)§     |                  | 3 (0.4)§   |                  | 14 (0.1)§     | 13 (0.1)§    |                  |
| <b>Maternal smoking Status</b>                     |               |               |                  |               |                  |            |                  |               |              |                  |
| Unknown                                            | 6,505 (6.1)§  | 819 (1.9)§    | <b>&lt;0.001</b> | 500 (2.1)§    | <b>&lt;0.001</b> | 32 (4.2)§  | 0.132            | 448 (2.2)§    | 155 (1.5)§   | <b>&lt;0.001</b> |
| Ex-smoker                                          | 5,952 (5.6)   | 3,363 (7.6)   |                  | 1,923 (8.1)   |                  | 35 (4.8)   |                  | 1,427 (7.1)   | 660 (6.5)    |                  |
| Non-smoker                                         | 70,319 (69.9) | 31,421 (72.8) |                  | 15,755 (66.8) |                  | 534 (73.2) |                  | 15,525 (77.3) | 8,368 (82.6) |                  |
| Smoker                                             | 24,367 (24.2) | 8,395 (19.4)  |                  | 5,921 (25.1)  |                  | 161 (22.2) |                  | 3,144 (15.6)  | 1,108 (10.9) |                  |
| <b>Maternal SIMD Decile</b>                        |               |               |                  |               |                  |            |                  |               |              |                  |
| Least Deprived (7-10)                              | 65,227 (61.8) | 25,192 (57.9) | <b>&lt;0.001</b> | 12,807 (53.8) | <b>&lt;0.001</b> | 501 (66.3) | <b>0.012</b>     | 12,806 (62.9) | 6,714 (66.1) | <b>&lt;0.001</b> |
| Most Deprived (1-6)                                | 40,321 (38.2) | 18,289 (42.1) |                  | 11,017 (46.2) |                  | 255 (33.7) |                  | 7,564 (37.1)  | 3,442 (33.9) |                  |
| Missing                                            | 1,595 (1.5)§  | 517 (1.2)§    |                  | 275 (1.1)§    |                  | 6 (0.8)§   |                  | 174 (0.8)§    | 135 (1.3)§   |                  |
| <b>Maternal hypertensive disorders</b>             |               |               |                  |               |                  |            |                  |               |              |                  |
| None                                               | 91,276 (85.2) | 35,529 (80.8) | <b>&lt;0.001</b> | 18,635 (77.3) | <b>&lt;0.001</b> | 636 (83.5) | <b>0.001</b>     | 18,851 (91.8) | 9,273 (90.1) | <b>&lt;0.001</b> |
| Gestational Hypertension                           | 13,029 (12.2) | 5,501 (12.5)  |                  | 3,584 (14.9)  |                  | 88 (11.5)  |                  | 1,165 (5.7)   | 690 (6.7)    |                  |
| Preeclampsia                                       | 2,780 (2.6)   | 2,941 (6.7)   |                  | 1,861 (7.7)   |                  | 38 (5.0)   |                  | 523 (2.5)     | 324 (3.1)    |                  |
| Eclampsia                                          | 58 (0.1)      | 27 (0.1)      |                  | 19 (0.1)      |                  | 0 (0.0)    |                  | 5 (<0.1)      | 4 (<0.1)     |                  |
| <b>Maternal antepartum haemorrhage</b>             |               |               |                  |               |                  |            |                  |               |              |                  |
| No haemorrhage                                     | 97,527 (91.0) | 37,673 (85.6) | <b>&lt;0.001</b> | 20,306 (84.3) | <b>&lt;0.001</b> | 684 (89.8) | 0.434            | 18,549 (90.3) | 9,244 (89.8) | <b>&lt;0.001</b> |
| Abruption                                          | 697 (0.7)     | 468 (1.1)     |                  | 221 (0.9)     |                  | 8 (1.0)    |                  | 103 (0.5)     | 106 (1.0)    |                  |
| Placenta previa                                    | 308 (0.3)     | 368 (0.8)     |                  | 152 (0.6)     |                  | 2 (0.3)    |                  | 23 (0.1)      | 114 (1.1)    |                  |
| Unspecified                                        | 8,611 (8.0)   | 5,489 (12.5)  |                  | 3,420 (14.2)  |                  | 68 (8.9)   |                  | 1,869 (9.1)   | 827 (8.0)    |                  |
| <b>Type of labour</b>                              |               |               |                  |               |                  |            |                  |               |              |                  |
| Elective Caesarean Section                         | 5,967 (5.6)   | 6,925 (15.7)  | <b>&lt;0.001</b> | 1,384 (5.7)   | <b>&lt;0.001</b> | 67 (8.8)   | <b>&lt;0.001</b> | 616 (3.0)     | 3,843 (37.3) | <b>&lt;0.001</b> |
| Induced                                            | 24,120 (22.5) | 16,276 (37.0) |                  | 10,067 (41.8) |                  | 228 (29.9) |                  | 3,895 (19.0)  | 1,998 (19.4) |                  |
| Spontaneous                                        | 77,056 (71.9) | 20,797 (47.3) |                  | 12,648 (52.5) |                  | 467 (61.3) |                  | 16,033 (78.0) | 4,450 (43.2) |                  |

| <b>Type of delivery</b>              |                |               |                  |               |                  |            |                  |               |              |                  |
|--------------------------------------|----------------|---------------|------------------|---------------|------------------|------------|------------------|---------------|--------------|------------------|
| Spontaneous vaginal delivery (SVD)   | 75,027 (70.1)  | 19,287 (43.8) | <b>&lt;0.001</b> | 15,983 (66.3) | <b>&lt;0.001</b> | 496 (65.2) | <b>0.003</b>     | 16,398 (79.8) | 1,403 (13.6) | <b>&lt;0.001</b> |
| Instrumental                         | 15,409 (14.4)  | 8,107 (18.4)  |                  | 4,043 (16.8)  |                  | 120 (15.8) |                  | 2,546 (12.4)  | 1,927 (18.7) |                  |
| Caesarean Section                    | 15,566 (14.5)  | 16,351 (37.2) |                  | 3,879 (16.1)  |                  | 141 (18.5) |                  | 1,509 (7.3)   | 6,937 (67.4) |                  |
| Other                                | 1,096 (1.0)    | 247 (0.6)     |                  | 191 (0.8)     |                  | 4 (0.5)    |                  | 89 (0.4)      | 24 (0.2)     |                  |
| Missing                              | 45 (<0.1)§     | 6 (<0.1)§     |                  | 3 (<0.1)§     |                  | 1 (0.1)§   |                  | 2 (<0.1)§     | 0 (0.0)§     |                  |
| <b>Analgesia during labour</b>       |                |               |                  |               |                  |            |                  |               |              |                  |
| No                                   | 105,176 (98.2) | 36,117 (82.1) | <b>&lt;0.001</b> | 20,974 (87.0) | <b>&lt;0.001</b> | 729 (95.7) | <b>&lt;0.001</b> | 19,915 (96.9) | 8,235 (80.0) | <b>&lt;0.001</b> |
| Yes                                  | 1,967 (1.8)    | 7,881 (17.9)  |                  | 3,125 (13.0)  |                  | 33 (4.3)   |                  | 629 (3.1)     | 2,056 (20.0) |                  |
| <b>Baby presentation at delivery</b> |                |               |                  |               |                  |            |                  |               |              |                  |
| Occiput anterior                     | 11,571 (10.8)  | 8,152 (18.6)  | <b>&lt;0.001</b> | 2,636 (11.0)  | 0.525            | 68 (8.9)   | 0.093            | 1,401 (6.8)   | 2,967 (28.9) | <b>&lt;0.001</b> |
| Occiput posterior                    | 95,352 (89.2)  | 35,745 (81.4) |                  | 21,409 (89.0) |                  | 694 (91.1) |                  | 19,100 (93.2) | 7,306 (71.1) |                  |
| Missing                              | 220 (0.2)§     | 101 (0.2)§    |                  | 54 (0.2)§     |                  | 0 (0.0)§   |                  | 43 (0.2)§     | 18 (0.2)§    |                  |
| <b>Sex of baby</b>                   |                |               |                  |               |                  |            |                  |               |              |                  |
| Female                               | 52,265 (48.8)  | 21,139 (48.0) | <b>0.010</b>     | 11,739 (48.7) | 0.861            | 367 (48.2) | 0.732            | 10,124 (49.3) | 4,907 (47.7) | <b>0.008</b>     |
| Male                                 | 54,866 (51.2)  | 22,852 (51.9) |                  | 12,354 (51.3) |                  | 395 (51.8) |                  | 10,417 (50.7) | 5,384 (52.3) |                  |
| Missing                              | 12 (<0.1)§     | 7 (<0.1)§     |                  | 6 (<0.1)§     |                  | 0 (0.0)§   |                  | 3 (<0.1)§     | 0 (0.0)§     |                  |

n/a, not applicable; n, number of pregnancies

\*Only applicable to Diclofenac 2005-2015 analysis

†p value in comparison to the first ("No analgesic") column

‡p value in comparison to "No analgesic 2005-2015" control column

§Percentage of missing data on total, not included in the analysis

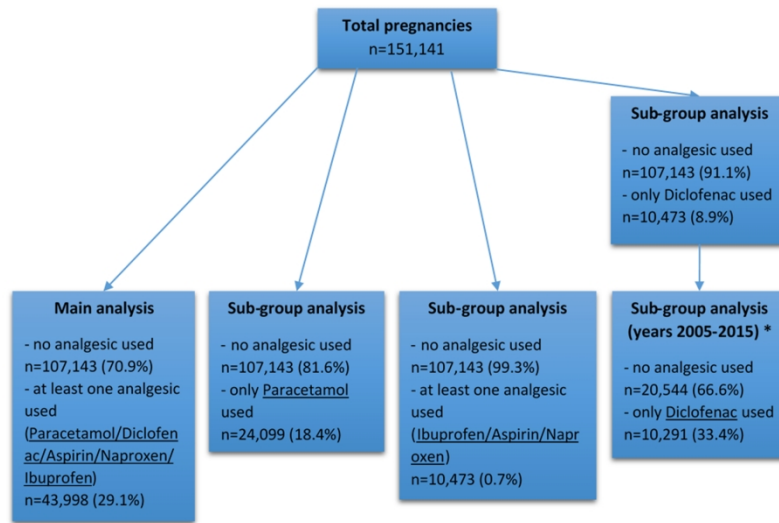

Figure 1. Flowchart of cohort selection and sub-group analyses. n=number of pregnancies in each analysis.\*98.3% of pregnancies using only diclofenac occurred during 2005-2015, therefore analysis was performed only on data from that decade to rule out any temporal effect.

338x190mm (300 x 300 DPI)

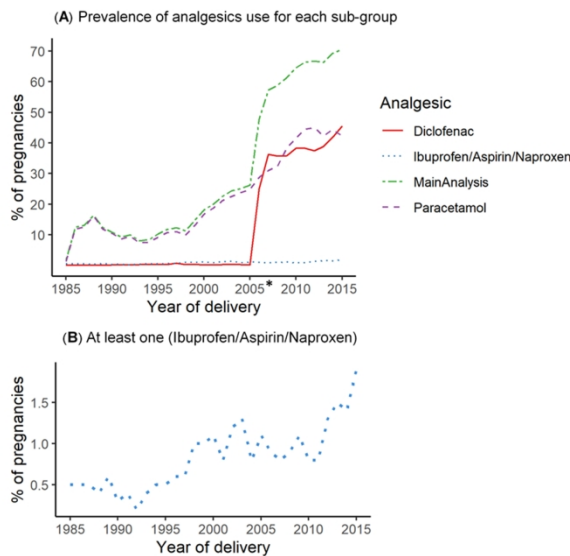

Figure 2. Prevalence of use during pregnancy for each analgesic sub-group over our 30-year study period. (A) Merge graph showing percentage of pregnancies using each analgesic group during pregnancy. (B) Percentage of use for at least one analgesic out of ibuprofen, aspirin, naproxen. \*In 2005 there was a change in legislation making diclofenac available without prescription.

338x190mm (300 x 300 DPI)

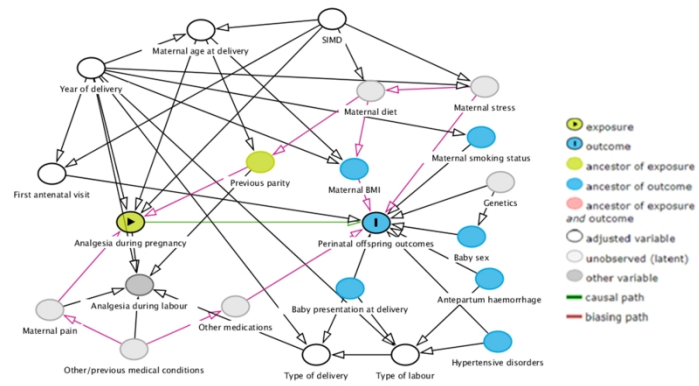

Figure S1. Directed acyclic graph (DAG) of exposure to outcome path and relevant measured and unmeasured biasing factors in our analysis.

338x190mm (300 x 300 DPI)

**Table S1.** Numbers needed to harm (NNH) calculations

| Outcomes                                    | No analgesic<br>(n=107,143)<br>n (%) | At least one<br>analgesic<br>(n=43,998)<br>n (%) | NNH  | Paracetamol<br>(n=24,099)<br>n (%) | NNH | Ibu/Asp/Napr<br>(n=762)<br>n (%) | NNH |
|---------------------------------------------|--------------------------------------|--------------------------------------------------|------|------------------------------------|-----|----------------------------------|-----|
| <b>Gestation at delivery (weeks)</b>        |                                      |                                                  |      |                                    |     |                                  |     |
| >=37                                        | 100,879 (94.2)                       | 39,838 (90.5)                                    |      | 21,589 (89.6)                      |     | 697 (91.5)                       |     |
| <37                                         | 6,264 (5.8)                          | 4,160 (9.5)                                      | 27   | 2,510 (10.4)                       | 22  | 65 (8.5)                         | 37  |
| <b>Pregnancy outcome</b>                    |                                      |                                                  |      |                                    |     |                                  |     |
| Livebirth                                   | 105,949 (98.9)                       | 43,407 (98.7)                                    |      | 23,704 (98.4)                      |     | 747 (98.0)                       |     |
| Stillbirth                                  | 803 (0.7)                            | 405 (0.9)                                        | 500  | 275 (1.1)                          | 250 | 13 (1.7)                         | 100 |
| Neonatal<br>Death                           | 373 (0.3)                            | 182 (0.4)                                        | 1000 | 117 (0.5)                          | 500 | 2 (0.3)                          | n/a |
| Missing                                     | 18 (<0.1)                            | 4 (<0.1)                                         | n/a  | 3 (<0.1)                           | n/a | 0 (0.0)                          | n/a |
| <b>Weight of baby (grams)</b>               |                                      |                                                  |      |                                    |     |                                  |     |
| NBW                                         | 87,966 (82.1)                        | 34,555 (78.6)                                    |      | 19,163 (79.5)                      |     | 605 (79.5)                       |     |
| LBW                                         | 5,910 (5.5)                          | 3,571 (8.1)                                      | 38   | 2,213 (9.2)                        | 39  | 59 (7.7)                         | 46  |
| HBW                                         | 13,233 (12.4)                        | 5,863 (13.3)                                     | 111  | 2,720 (11.3)                       | n/a | 97 (12.7)                        | 333 |
| Missing                                     | 34 (<0.1)                            | 9 (<0.1)                                         | n/a  | 3 (<0.1)                           | n/a | 1 (0.1)                          | n/a |
| <b>Admitted to neonatal unit</b>            |                                      |                                                  |      |                                    |     |                                  |     |
| No                                          | 62,378 (58.2)                        | 32,391 (73.6)                                    |      | 16,342 (67.8)                      |     | 480 (63.0)                       |     |
| Yes                                         | 11,011 (10.3)                        | 7,448 (16.9)                                     | 15   | 3,956 (16.4)                       | 16  | 117 (15.4)                       | 20  |
| Missing                                     | 33,754 (31.5)                        | 4,159 (9.5)                                      | n/a  | 3,801 (15.8)                       | n/a | 762 (21.7)                       | n/a |
| <b>APGAR score at 1 min</b>                 |                                      |                                                  |      |                                    |     |                                  |     |
| Normal                                      | 92,217 (86.1)                        | 38,224 (86.9)                                    |      | 20,593 (85.5)                      |     | 659 (86.5)                       |     |
| <7                                          | 14,335 (13.4)                        | 5,674 (12.9)                                     | n/a  | 3,437(14.3)                        | 111 | 101 (13.3)                       | n/a |
| Missing                                     | 591 (0.6)                            | 100 (0.2)                                        |      | 69 (0.3)                           | n/a | 2 (0.3)                          | n/a |
| <b>APGAR score at 5 min</b>                 |                                      |                                                  |      |                                    |     |                                  |     |
| Normal                                      | 104,292 (97.3)                       | 42,730 (97.1)                                    |      | 23,334 (96.8)                      |     | 738 (96.9)                       |     |
| <7                                          | 2,216 (2.1)                          | 1,163 (2.6)                                      | 200  | 690 (2.9)                          | 125 | 21 (2.8)                         | 143 |
| Missing                                     | 635 (0.6)                            | 105 (0.2)                                        | n/a  | 75 (0.3)                           | n/a | 3 (0.4)                          | n/a |
| <b>Cryptorchidism (only males included)</b> |                                      |                                                  |      |                                    |     |                                  |     |
| No                                          | 54,509 (99.3)                        | 22,616 (99.0)                                    |      | 12,247 (99.1)                      |     | 394 (99.4)                       |     |
| Yes                                         | 357 (0.7)                            | 236 (1.0)                                        | 333  | 107 (0.9)                          | 500 | 1 (0.3)                          | n/a |
| <b>Neural Tube Defects</b>                  |                                      |                                                  |      |                                    |     |                                  |     |
| No                                          | 107,093 (99.9)                       | 43,928 (99.8)                                    |      | 24,077 (99.9)                      |     | 762 (100)                        |     |
| Yes                                         | 50 (0.1)                             | 70 (0.2)                                         | 1000 | 22 (0.1)                           | n/a | 0 (0.0)                          | n/a |
| <b>Amniotic Band Defects</b>                |                                      |                                                  |      |                                    |     |                                  |     |
| No                                          | 107,053 (99.9)                       | 43,936 (99.9)                                    |      | 24,070 (99.9)                      |     | 760 (99.7)                       |     |
| Yes                                         | 90 (0.1)                             | 62 (0.1)                                         | n/a  | 29 (0.1)                           | n/a | 2 (0.3)                          | 500 |
| <b>Hypospadias (only males included)</b>    |                                      |                                                  |      |                                    |     |                                  |     |
| No                                          | 54,607 (99.5)                        | 22,600 (98.9)                                    |      | 12,258 (99.2)                      |     | 390 (98.7)                       |     |
| Yes                                         | 259 (0.3)                            | 252 (1.1)                                        | 125  | 96 (0.8)                           | 200 | 5 (1.3)                          | 100 |
| <b>Gastroschisis</b>                        |                                      |                                                  |      |                                    |     |                                  |     |
| No                                          | 107,120 (99.9)                       | 43,979 (99.9)                                    |      | 24,089 (99.9)                      |     | 762(100)                         |     |
| Yes                                         | 23 (0.1)                             | 19 (0.1)                                         | n/a  | 10 (0.1)                           | n/a | 0 (0.0)                          | n/a |
| <b>At least one outcome*</b>                |                                      |                                                  |      |                                    |     |                                  |     |
| No                                          | 106,367<br>(99.3%)                   | 43,363 (98.6%)                                   |      | 23,835 (98.9%)                     |     | 754 (99.0%)                      |     |
| Yes                                         | 776 (0.7%)                           | 635 (1.4%)                                       | 142  | 264 (1.1%)                         | 250 | 8 (1.0%)                         | 333 |

n/a, not applicable



**Table S2.** Numbers needed to harm (NNH) for exposure to diclofenac (years 2005-2015).

| Outcomes                                    | No analgesic<br>(n=20,544)<br>n (%) | Diclofenac<br>2005-2015<br>(n=10,291)<br>n (%) | NNH |
|---------------------------------------------|-------------------------------------|------------------------------------------------|-----|
| <b>Gestation at delivery (weeks)</b>        |                                     |                                                |     |
| >=37                                        | 19,407 (94.5%)                      | 9,640 (93.7%)                                  |     |
| <37                                         | 1,137 (5.5%)                        | 651 (6.3%)                                     | 125 |
| <b>Pregnancy outcome</b>                    |                                     |                                                |     |
| Livebirth                                   | 20,393 (99.3%)                      | 10,227 (99.4%)                                 |     |
| Stillbirth                                  | 116 (0.5%)                          | 39 (0.4%)                                      | n/a |
| Neonatal Death                              | 35 (0.2%)                           | 25 (0.2%)                                      | n/a |
| <b>Weight of baby (grams)</b>               |                                     |                                                |     |
| NBW                                         | 16,869 (82.1%)                      | 8,116 (78.9%)                                  |     |
| LBW                                         | 965 (4.7%)                          | 572 (5.6%)                                     | 111 |
| HBW                                         | 2,707 (13.2%)                       | 1,600 (15.5%)                                  | 44  |
| Missing                                     | 3 (0.0%)                            | 3 (0.0%)                                       |     |
| <b>Admitted to neonatal unit</b>            |                                     |                                                |     |
| No                                          | 18,224 (88.7%)                      | 8,747 (85.0%)                                  |     |
| Yes                                         | 2,175 (10.6%)                       | 1,492 (14.5%)                                  | 26  |
| Missing                                     | 145 (0.7%)                          | 52 (0.5%)                                      |     |
| <b>APGAR score at 1 min</b>                 |                                     |                                                |     |
| Normal                                      | 18,709 (91.1%)                      | 9,350 (90.9%)                                  |     |
| <7                                          | 1,658 (8.1%)                        | 924 (9.0%)                                     | 111 |
| Missing                                     | 177 (0.9%)                          | 17 (0.2%)                                      |     |
| <b>APGAR score at 5 min</b>                 |                                     |                                                |     |
| Normal                                      | 20,065 (97.7%)                      | 10,096 (98.1%)                                 |     |
| <7                                          | 302 (1.5%)                          | 177 (1.7%)                                     | 500 |
| Missing                                     | 177 (0.9%)                          | 18 (0.2%)                                      |     |
| <b>Cryptorchidism (only males included)</b> |                                     |                                                |     |
| No                                          | 10,284 (98.7%)                      | 5,314 (98.7%)                                  |     |
| Yes                                         | 133 (1.3%)                          | 70 (1.3%)                                      | n/a |
| <b>Neural Tube Defects</b>                  |                                     |                                                |     |
| No                                          | 20,527 (99.9%)                      | 10,263 (99.7%)                                 |     |
| Yes                                         | 17 (0.1%)                           | 28 (0.3%)                                      | 500 |
| <b>Amniotic Band Defects</b>                |                                     |                                                |     |
| No                                          | 20,514 (99.9%)                      | 10,277 (99.9%)                                 |     |
| Yes                                         | 30 (0.1%)                           | 14 (0.1%)                                      | n/a |
| <b>Hypospadias (only males included)</b>    |                                     |                                                |     |
| No                                          | 10,317 (99.0%)                      | 5,308 (98.6%)                                  |     |
| Yes                                         | 100 (1.0%)                          | 76 (1.4%)                                      | 250 |
| <b>Gastroschisis</b>                        |                                     |                                                |     |
| No                                          | 20,538 (99.9%)                      | 10,284 (99.9%)                                 |     |
| Yes                                         | 6 (0.1%)                            | 7 (0.1%)                                       | n/a |
| <b>At least one outcome*</b>                |                                     |                                                |     |
| No                                          | 20,258 (98.6%)                      | 10,097 (98.1%)                                 |     |
| Yes                                         | 286 (1.4%)                          | 194 (1.9%)                                     | 200 |

n/a, not applicable

1 STROBE Statement—Checklist of items that should be included in reports of *cohort studies*

|                              | Item No | Recommendation                                                                                                                                                                       | Paragraph #                                        |
|------------------------------|---------|--------------------------------------------------------------------------------------------------------------------------------------------------------------------------------------|----------------------------------------------------|
| Title and abstract           | 1       | (a) Indicate the study's design with a commonly used term in the title or the abstract                                                                                               | Title & Abstract<br>Pages 1-3                      |
|                              |         | (b) Provide in the abstract an informative and balanced summary of what was done and what was found                                                                                  | Abstract<br>Pages 2-3                              |
| <b>Introduction</b>          |         |                                                                                                                                                                                      |                                                    |
| Background/rationale         | 2       | Explain the scientific background and rationale for the investigation being reported                                                                                                 | Introduction<br>Page 5                             |
| Objectives                   | 3       | State specific objectives, including any prespecified hypotheses                                                                                                                     | Introduction<br>Page 5                             |
| <b>Methods</b>               |         |                                                                                                                                                                                      |                                                    |
| Study design                 | 4       | Present key elements of study design early in the paper                                                                                                                              | Methods<br>Page 7                                  |
| Setting                      | 5       | Describe the setting, locations, and relevant dates, including periods of recruitment, exposure, follow-up, and data collection                                                      | Methods<br>Page 7                                  |
| Participants                 | 6       | (a) Give the eligibility criteria, and the sources and methods of selection of participants. Describe methods of follow-up                                                           | Methods<br>Pages 7-8                               |
|                              |         | (b) For matched studies, give matching criteria and number of exposed and unexposed                                                                                                  | n/a                                                |
| Variables                    | 7       | Clearly define all outcomes, exposures, predictors, potential confounders, and effect modifiers. Give diagnostic criteria, if applicable                                             | Methods<br>Pages 8-9                               |
| Data sources/<br>measurement | 8*      | For each variable of interest, give sources of data and details of methods of assessment (measurement). Describe comparability of assessment methods if there is more than one group | Methods<br>Pages 8-9                               |
| Bias                         | 9       | Describe any efforts to address potential sources of bias                                                                                                                            | Methods<br>Pages 7-8                               |
| Study size                   | 10      | Explain how the study size was arrived at                                                                                                                                            | Methods<br>Page 7                                  |
| Quantitative variables       | 11      | Explain how quantitative variables were handled in the analyses. If applicable, describe which groupings were chosen and why                                                         | Methods<br>Pages 8-9                               |
| Statistical methods          | 12      | (a) Describe all statistical methods, including those used to control for confounding                                                                                                | Statistical<br>Analysis<br>paragraph<br>pages 9-10 |
|                              |         | (b) Describe any methods used to examine subgroups and interactions                                                                                                                  | Statistical<br>Analysis<br>paragraph<br>pages 9-10 |
|                              |         | (c) Explain how missing data were addressed                                                                                                                                          | Statistical<br>Analysis<br>paragraph<br>pages 9-10 |
|                              |         | (d) If applicable, explain how loss to follow-up was addressed                                                                                                                       | n/a                                                |
|                              |         | (e) Describe any sensitivity analyses                                                                                                                                                | n/a                                                |

| <b>Results</b>           |     |                                                                                                                                                                                                                                                                                                 |                                                                        |
|--------------------------|-----|-------------------------------------------------------------------------------------------------------------------------------------------------------------------------------------------------------------------------------------------------------------------------------------------------|------------------------------------------------------------------------|
| Participants             | 13* | (a) Report numbers of individuals at each stage of study—eg numbers potentially eligible, examined for eligibility, confirmed eligible, included in the study, completing follow-up, and analysed<br>(b) Give reasons for non-participation at each stage<br>(c) Consider use of a flow diagram | <b>Figure 1</b><br><b>Results</b><br><b>Page 11</b><br><b>Figure 1</b> |
| Descriptive data         | 14* | (a) Give characteristics of study participants (eg demographic, clinical, social) and information on exposures and potential confounders                                                                                                                                                        | <b>Table 1</b><br><b>Pages 29-31</b>                                   |
|                          |     | (b) Indicate number of participants with missing data for each variable of interest                                                                                                                                                                                                             | <b>Table 1</b><br><b>Pages 29-31</b>                                   |
|                          |     | (c) Summarise follow-up time (eg, average and total amount)                                                                                                                                                                                                                                     | n/a                                                                    |
| Outcome data             | 15* | Report numbers of outcome events or summary measures over time                                                                                                                                                                                                                                  | <b>Tables 2 and 3</b><br><b>Pages 32-35</b>                            |
| Main results             | 16  | (a) Give unadjusted estimates and, if applicable, confounder-adjusted estimates and their precision (eg, 95% confidence interval). Make clear which confounders were adjusted for and why they were included                                                                                    | <b>Tables 2 and 3</b><br><b>Pages 32-35</b>                            |
|                          |     | (b) Report category boundaries when continuous variables were categorized                                                                                                                                                                                                                       | <b>Table 1</b><br><b>Pages 29-31</b>                                   |
|                          |     | (c) If relevant, consider translating estimates of relative risk into absolute risk for a meaningful time period                                                                                                                                                                                | <b>Tables 2 and 3</b><br><b>Pages 32-35</b>                            |
| Other analyses           | 17  | Report other analyses done—eg analyses of subgroups and interactions, and sensitivity analyses                                                                                                                                                                                                  | n/a                                                                    |
| <b>Discussion</b>        |     |                                                                                                                                                                                                                                                                                                 |                                                                        |
| Key results              | 18  | Summarise key results with reference to study objectives                                                                                                                                                                                                                                        | <b>Discussion</b><br><b>Pages 16-17</b>                                |
| Limitations              | 19  | Discuss limitations of the study, taking into account sources of potential bias or imprecision. Discuss both direction and magnitude of any potential bias                                                                                                                                      | <b>Discussion</b><br><b>Pages 16-18</b>                                |
| Interpretation           | 20  | Give a cautious overall interpretation of results considering objectives, limitations, multiplicity of analyses, results from similar studies, and other relevant evidence                                                                                                                      | <b>Discussion</b><br><b>Pages 19-21</b>                                |
| Generalisability         | 21  | Discuss the generalisability (external validity) of the study results                                                                                                                                                                                                                           | <b>Discussion</b><br><b>Pages 20-21</b>                                |
| <b>Other information</b> |     |                                                                                                                                                                                                                                                                                                 |                                                                        |
| Funding                  | 22  | Give the source of funding and the role of the funders for the present study and, if applicable, for the original study on which the present article is based                                                                                                                                   | <b>Manuscript</b><br><b>pages 4 and 21</b>                             |

\*Give information separately for exposed and unexposed groups.

**Note:** An Explanation and Elaboration article discusses each checklist item and gives methodological background and published examples of transparent reporting. The STROBE checklist is best used in conjunction with this article (freely

1 available on the Web sites of PLoS Medicine at <http://www.plosmedicine.org/>, Annals of Internal Medicine at  
2 <http://www.annals.org/>, and Epidemiology at <http://www.epidem.com/>). Information on the STROBE Initiative is  
3 available at <http://www.strobe-statement.org>.  
4  
5  
6  
7  
8  
9  
10  
11  
12  
13  
14  
15  
16  
17  
18  
19  
20  
21  
22  
23  
24  
25  
26  
27  
28  
29  
30  
31  
32  
33  
34  
35  
36  
37  
38  
39  
40  
41  
42  
43  
44  
45  
46  
47  
48  
49  
50  
51  
52  
53  
54  
55  
56  
57  
58  
59  
60

For peer review only

# BMJ Open

## Maternal over-the-counter analgesics use during pregnancy and adverse perinatal outcomes: Cohort study of 151,141 singleton pregnancies

|                                 |                                                                                                                                                                                                                                                                                                                                                         |
|---------------------------------|---------------------------------------------------------------------------------------------------------------------------------------------------------------------------------------------------------------------------------------------------------------------------------------------------------------------------------------------------------|
| Journal:                        | <i>BMJ Open</i>                                                                                                                                                                                                                                                                                                                                         |
| Manuscript ID                   | bmjopen-2020-048092.R2                                                                                                                                                                                                                                                                                                                                  |
| Article Type:                   | Original research                                                                                                                                                                                                                                                                                                                                       |
| Date Submitted by the Author:   | 07-Mar-2022                                                                                                                                                                                                                                                                                                                                             |
| Complete List of Authors:       | Zafeiri, Aikaterini; University of Aberdeen, School of Medicine, Medical Sciences and Nutrition<br>Raja, Edwin Amalraj; University of Aberdeen, Medical Statistics Team<br>Mitchell, Rod; The University of Edinburgh<br>Hay, David ; University of Edinburgh<br>Bhattacharya, Sohinee; University of Aberdeen<br>Fowler, Paul ; University of Aberdeen |
| <b>Primary Subject Heading</b>: | Epidemiology                                                                                                                                                                                                                                                                                                                                            |
| Secondary Subject Heading:      | Obstetrics and gynaecology                                                                                                                                                                                                                                                                                                                              |
| Keywords:                       | OBSTETRICS, CLINICAL PHARMACOLOGY, EPIDEMIOLOGY                                                                                                                                                                                                                                                                                                         |
|                                 |                                                                                                                                                                                                                                                                                                                                                         |

SCHOLARONE™  
Manuscripts



I, the Submitting Author has the right to grant and does grant on behalf of all authors of the Work (as defined in the below author licence), an exclusive licence and/or a non-exclusive licence for contributions from authors who are: i) UK Crown employees; ii) where BMJ has agreed a CC-BY licence shall apply, and/or iii) in accordance with the terms applicable for US Federal Government officers or employees acting as part of their official duties; on a worldwide, perpetual, irrevocable, royalty-free basis to BMJ Publishing Group Ltd ("BMJ") its licensees and where the relevant Journal is co-owned by BMJ to the co-owners of the Journal, to publish the Work in this journal and any other BMJ products and to exploit all rights, as set out in our [licence](#).

The Submitting Author accepts and understands that any supply made under these terms is made by BMJ to the Submitting Author unless you are acting as an employee on behalf of your employer or a postgraduate student of an affiliated institution which is paying any applicable article publishing charge ("APC") for Open Access articles. Where the Submitting Author wishes to make the Work available on an Open Access basis (and intends to pay the relevant APC), the terms of reuse of such Open Access shall be governed by a Creative Commons licence – details of these licences and which [Creative Commons](#) licence will apply to this Work are set out in our licence referred to above.

Other than as permitted in any relevant BMJ Author's Self Archiving Policies, I confirm this Work has not been accepted for publication elsewhere, is not being considered for publication elsewhere and does not duplicate material already published. I confirm all authors consent to publication of this Work and authorise the granting of this licence.

1 **Title:** Maternal over-the-counter analgesics use during pregnancy and adverse  
2 perinatal outcomes: Cohort study of 151,141 singleton pregnancies

3  
4 **Authors:** <sup>1</sup>Aikaterini ZAFEIRI, MSci, Ms, <sup>2</sup>Edwin A. RAJA, PhD, <sup>3</sup>Rod T. MITCHELL,  
5 MBChB, PhD, <sup>4</sup>David C. HAY, PhD, <sup>5</sup>Sohinee BHATTACHARYA, MBBS, PhD, <sup>1</sup>Paul  
6 A. FOWLER, FRSB, PhD

7 <sup>1</sup>Institute of Medical Sciences, School of Medicine, Medical Sciences and Nutrition,  
8 University of Aberdeen, Aberdeen, United Kingdom, <sup>2</sup>Medical Statistics Team,  
9 Institute of Applied Health Sciences, School of Medicine, Medical Sciences and  
10 Nutrition, University of Aberdeen, Aberdeen, United Kingdom, <sup>3</sup>MRC Centre for  
11 Reproductive Health, The Queen's Medical Research Institute, University of  
12 Edinburgh, 47 Little France Crescent, Edinburgh, EH16 4JT, UK, <sup>4</sup>MRC Centre for  
13 Regenerative Medicine, 5 Little France Drive, Edinburgh, UK, <sup>5</sup>Aberdeen Centre for  
14 Women's Health Research, Institute of Applied Health Sciences, School of Medicine,  
15 Medical Sciences and Nutrition, University of Aberdeen, Aberdeen, United Kingdom,

16 **Corresponding Author:** Aikaterini Zafeiri, Institute of Medical Sciences, School of  
17 Medicine, Medical Sciences and Nutrition, University of Aberdeen, Aberdeen, United  
18 Kingdom, cell phone number: (+44)7713837285, email: [r01az17@abdn.ac.uk](mailto:r01az17@abdn.ac.uk)

19 **Running Title:** Maternal over-the-counter analgesia and offspring outcomes

1  
2  
3 20 **Abstract**  
4

5  
6 21 OBJECTIVES  
7

8  
9 22 To identify any associations between *in utero* exposure to five over-the-counter (non-  
10  
11 23 prescription) analgesics (paracetamol, ibuprofen, aspirin, diclofenac, naproxen) and  
12  
13 24 adverse neonatal outcomes.  
14  
15

16 25 DESIGN  
17

18  
19 26 Retrospective cohort study using the Aberdeen Maternity and Neonatal Databank.  
20  
21

22 27 PARTICIPANTS  
23

24  
25 28 151,141 singleton pregnancies between 1985 and 2015.  
26  
27

28 29 MAIN OUTCOME MEASURES  
29

30  
31 30 Premature delivery (<37 weeks), stillbirth, neonatal death, birthweight, standardised  
32  
33 31 birthweight score, neonatal unit admission, APGAR score at 1 and 5 minutes, neural  
34  
35 32 tube and amniotic band defects, gastroschisis and, in males, cryptorchidism, and  
36  
37 33 hypospadias.  
38  
39

40 41 RESULTS  
42

43  
44 35 83.7% of women taking over-the-counter analgesics reported first trimester use  
45  
46 36 when specifically asked about use at their first antenatal clinic visit. Pregnancies  
47  
48 37 exposed to at least one of the five analgesics were significantly independently  
49  
50 38 associated with increased risks for premature delivery <37 weeks (aOR=1.50,  
51  
52 39 95%CI 1.43-1.58), stillbirth (aOR=1.33, 95%CI 1.15-1.54), neonatal death  
53  
54 40 (aOR=1.56, 95%CI 1.27-1.93), birthweight <2,500g (aOR=1.28, 95%CI 1.20-1.37),  
55  
56 41 birthweight >4,000g (aOR=1.09, 95%CI 1.05-1.13), admission to neonatal unit  
57  
58  
59  
60



1  
2  
3 42 (aOR=1.57, 95%CI 1.51-1.64), APGAR score <7 at 1 minute (aOR=1.18, 95%CI  
4  
5 43 1.13-1.23) and 5 minutes (aOR=1.48, 95%CI 1.35-1.62), neural tube defects  
6  
7 44 (aOR=1.64, 95%CI 1.08-2.47) and hypospadias (aOR=1.27, 95%CI 1.05-1.54 males  
8  
9 45 only). The overall prevalence of over-the-counter analgesics use during pregnancy  
10  
11 46 was 29.1%, however it rapidly increased over the 30-year study period, to include  
12  
13 47 over 60% of women in the last seven years of the study. This makes our findings  
14  
15 48 highly relevant to the wider pregnant population.  
16  
17  
18  
19

## 20 49 CONCLUSIONS

21  
22  
23 50 Over-the-counter (non-prescription) analgesics consumption during pregnancy was  
24  
25 51 associated with a substantially higher risk for adverse perinatal health outcomes in  
26  
27 52 the offspring. The use of paracetamol in combination with other non-steroidal anti-  
28  
29 53 inflammatory drugs conferred the highest risk. The increased risks of adverse  
30  
31 54 neonatal outcomes associated with non-prescribed, over-the-counter, analgesics use  
32  
33 55 during pregnancy indicate that healthcare guidance for pregnant women regarding  
34  
35 56 analgesic use need urgent updating.  
36  
37  
38  
39

### 40 57 **Strengths and limitations of this study**

- 41  
42  
43 58 • This is one of the largest and most comprehensive studies of this type. It  
44  
45 59 includes consumption of five different analgesics during pregnancy in a large  
46  
47 60 cohort of singleton pregnancies. It examines associations with extensive  
48  
49 61 range of offspring perinatal outcomes, while adjusting for important  
50  
51 62 confounding factors.  
52  
53  
54 63 • Analgesic consumption was analysed both as use of a single compound and  
55  
56 64 in combinations of the five drugs considered in this study.  
57  
58  
59  
60

- 1  
2  
3 65 • Details of the exact dose and timing of consumption during pregnancy were  
4  
5 66 not available within our dataset.  
6  
7  
8 67 • Follow-up of the offspring health later in life was not available at this time.  
9  
10  
11 68

12  
13  
14 69 **Funding** Biotechnology and Biological Sciences Research council (BBSRC) funding  
15  
16 70 under the EASTBIO doctoral training programme (grant number 1942576) to AZ and  
17  
18 71 EU Horizon 2020 project FREIA (Grant Number 825100) to PAF. RTM is supported  
19  
20 72 by MRC Centre for Reproductive Health Grant MR/N022556/1.  
21  
22

23 73 **Key words** acetaminophen, aspirin, diclofenac, ibuprofen, *in utero* exposure,  
24  
25 74 naproxen, offspring outcomes, over-the-counter analgesics, offspring outcomes,  
26  
27 75 paracetamol, pregnancy  
28  
29  
30

31 76  
32  
33  
34  
35  
36  
37  
38  
39  
40  
41  
42  
43  
44  
45  
46  
47  
48  
49  
50  
51  
52  
53  
54  
55  
56  
57  
58  
59  
60

## 77 Introduction

78 Globally 23-85% of women use one or more types of prescribed medications during  
79 pregnancy <sup>1,2</sup>. A similarly high proportion of expectant mothers self-medicate using  
80 non-prescription, “over-the-counter” (OTC) medicines <sup>3,4</sup> and use during pregnancy  
81 is becoming increasingly prevalent, especially in Western countries <sup>5</sup>. While some  
82 analgesics e.g. paracetamol (acetaminophen) are considered safe to consume  
83 throughout pregnancy, use of non-steroidal anti-inflammatory drugs (NSAIDs) is not  
84 recommended in pregnancy unless on the advice of a medical specialist and should  
85 be avoided beyond gestational week 30 because of the risk of premature closure of  
86 the ductus arteriosus. However, current evidence is largely conflicting regarding the  
87 safety of gestational analgesic use both for the pregnancy and offspring health <sup>6</sup>.  
88 Several studies have reported increased risks for multiple adverse outcomes  
89 including hypospadias, cryptorchidism, amniotic band defects and neural tube  
90 defects <sup>7-11</sup>, whilst others have not found significant associations <sup>12-17</sup>. Taken overall,  
91 this has led to significant concern that postnatal health is adversely affected by  
92 maternal analgesic use during pregnancy <sup>18</sup>.

93 The use of small cohorts in the current epidemiological studies makes it difficult to  
94 draw firm conclusions and definite recommendations<sup>12,17,19,20</sup>. There are other  
95 aspects of analgesic use that must be considered. Firstly, due to their abundance, it  
96 is not always feasible to determine exact consumption rates and dosage. Secondly,  
97 even though the mechanisms of action for most of these compounds is not fully  
98 understood, most over-the-counter analgesics can diffuse through the placenta and  
99 reach the developing fetus <sup>21</sup>. Thirdly, maternal pharmacokinetics during pregnancy  
100 are altered and there are limited pregnancy safety data for these compounds.

1  
2  
3 101 Given the diversity in study population, methodology, sample size and findings in the  
4  
5 102 published studies, we conclude that more extensive data from larger cohorts are  
6  
7 103 essential in order to understand the risks over-the-counter analgesic use during  
8  
9 104 pregnancy pose to neonatal health and function. Here we address many limitations -  
10  
11 105 however, not all<sup>22</sup> - of previous studies by analysing one of the largest cohorts,  
12  
13 106 widest range of health data and, pregnancy use of five over-the-counter analgesics  
14  
15 107 consumed in combination or separately. We report on the prevalence of maternal  
16  
17 108 consumption of five different over-the-counter analgesics during pregnancy and their  
18  
19 109 associations with offspring neonatal outcomes using a large cohort of 151,141  
20  
21 110 singleton pregnancies spanning three decades of population-based data from a  
22  
23 111 single maternity hospital serving the entire population of Aberdeenshire in the  
24  
25 112 Northeast of Scotland.  
26  
27  
28  
29  
30  
31  
32  
33  
34  
35  
36  
37  
38  
39  
40  
41  
42  
43  
44  
45  
46  
47  
48  
49  
50  
51  
52  
53  
54  
55  
56  
57  
58  
59  
60

## 113 **Materials and Methods**

114 This retrospective cohort study utilised data collected in the Aberdeen Maternity and  
115 Neonatal Databank (AMND) in Aberdeen, UK on 151,141 pregnancies over a 30-  
116 year period (1985-2015). Details about AMND have been previously published<sup>23</sup>.

117 Data were collected from medical notes of women retrospectively after delivery.

118 Women were specifically asked about their use of over-the-counter (non-  
119 prescription) analgesics at their first antenatal clinic. Data were entered by dedicated  
120 coding staff into a computerised database. Data validity was ensured via checking  
121 completeness of data entry against NHS (UK National Health Service) returns  
122 monthly and constant data cleaning and validation against case notes reported  
123 quarterly by the Data Management team to the AMND Steering Committee. A  
124 research protocol was submitted and approved by the AMND Steering Committee  
125 before data extraction. Approval was received on 6 June 2018. The dataset was fully  
126 anonymised, therefore there was no requirement for NHS ethics committee approval.  
127 There was no involvement of patients or the public in the design, or conduct, or  
128 reporting, or dissemination plans of our research.

129 The main analysis considered consumption during pregnancy of at least one out of  
130 five different analgesics: paracetamol (no; yes), ibuprofen (no; yes), naproxen (no;  
131 yes), diclofenac (no; yes) or aspirin (no; yes) as the exposure group against no  
132 analgesic consumption as the unexposed group. Then, three sub-group analyses  
133 against the control group were performed using only paracetamol, only diclofenac, or  
134 at least one analgesic from aspirin/naproxen/ibuprofen as exposure groups,  
135 excluding pregnancies exposed to multiple analgesics at the same time (Figure 1).

136 As 98.3% of pregnancies using diclofenac were between 2005 and 2015, diclofenac  
137 sub-group analysis only considered pregnancies during that time frame in order to

1  
2  
3 138 rule out any temporal effect. Analgesic consumption was not further assessed  
4  
5 139 analytically.  
6  
7

8 140 The offspring outcomes compared between control and exposed groups were:  
9  
10 141 gestation at delivery (preterm <37 gestation weeks, term  $\geq$ 37 gestation weeks),  
11  
12 142 pregnancy outcome (livebirth, stillbirth, neonatal death), baby weight (low birth  
13  
14 143 weight (LBW)  $\leq$ 2,499 g, high birth weight (HBW)  $\geq$ 4,000 g, normal birth weight  
15  
16 144 (NBW) 2,500g-3,999 g), standardised birthweight score was considered as a  
17  
18 145 continuous variable as previously described by Campbell and colleagues<sup>24</sup>, baby  
19  
20 146 admission to neonatal unit (no; yes), APGAR score at one and five minutes (<7,  $\geq$ 7),  
21  
22 147 cryptorchidism (no; yes) (ICD-10 code Q53), neural tube defects (no; yes) (ICD-10  
23  
24 148 code Q00-07), amniotic band defects (no; yes) (ICD-10 codes Q70-74), hypospadias  
25  
26 149 (no; yes) (ICD-10 code Q54), gastroschisis (no; yes) (ICD-10 code Q79.3). A  
27  
28 150 composite outcome (presence of at least one congenital anomaly (no; yes)) was  
29  
30 151 created using the variables neural tube defects, amniotic band defects, and  
31  
32 152 gastroschisis and, in males, cryptorchidism and hypospadias.  
33  
34  
35  
36  
37  
38

39 153 The baseline characteristics compared between exposed and unexposed  
40  
41 154 pregnancies were (reference category first): year of delivery (1985-1994, 1995-2004,  
42  
43 155 2005-2015), maternal age at delivery (20-25, <20, 26-35, >35 years), previous  
44  
45 156 pregnancy (no; yes), maternal body mass index (BMI) (normal weight 18.5-24.9  
46  
47 157 kg/m<sup>2</sup>, underweight <18.5 kg/m<sup>2</sup>, overweight 25-29.9 kg/m<sup>2</sup>, obese >30 kg/m<sup>2</sup>),  
48  
49 158 maternal first antenatal visit (1st, 2nd, 3rd trimester), maternal smoking status (non-  
50  
51 159 smoker, smoker, ex-smoker), Scottish Index of Multiple Deprivation (SIMD) decile (1-  
52  
53 160 6, 7-10, decreasing deprivation with increasing score), maternal hypertensive  
54  
55 161 disorders (no disorder, gestational hypertension, preeclampsia, eclampsia), maternal  
56  
57 162 antepartum haemorrhage (no haemorrhage, abruption, placental previa), type of  
58  
59  
60

1  
2  
3 163 labour (spontaneous, elective caesarean section, induced), type of delivery  
4  
5 164 (spontaneous vaginal delivery, instrumental, caesarean section), analgesia during  
6  
7 165 labour (no; yes), baby presentation at delivery (occiput anterior, occiput posterior),  
8  
9 166 baby sex (female; male).

### 13 167 **Patient and Public Involvement**

16 168 This was a retrospective analysis of data on singleton pregnancies over a 30-year  
17  
18 169 period. Therefore, there was no involvement of patients or the public in the design,  
19  
20 170 conduct, reporting or any other aspect of the study.

21  
22  
23  
24 171

### 26 172 **Statistical Analysis**

29 173 Baseline characteristics were compared between exposed and unexposed  
30  
31 174 pregnancies to any analgesic using  $\chi^2$  test for categorical variables and t-test for  
32  
33 175 normally distributed continuous variables as appropriate. Relationships between  
34  
35 176 exposures and outcomes were examined by binary logistic regression for binary  
36  
37 177 outcome variables, multinomial logistic regression for nominal categorical outcome  
38  
39 178 variables, and multiple linear regression for continuous variables. The strength of  
40  
41 179 association was reported as odds ratios (ORs) with 95% confidence intervals (CI).  
42  
43 180 The socio-demographic characteristics that were likely to confound our exposure-to-  
44  
45 181 outcome path were identified using directed acyclic graphs (DAG) (Supplementary  
46  
47 182 figures S1-11)<sup>25</sup>. Factors that were associated with consumption of over-the-counter  
48  
49 183 analgesics during pregnancy at 10% level of significance and deemed clinically  
50  
51 184 relevant, were included in the model as confounders. All outcomes were adjusted for  
52  
53 185 year of delivery, maternal age at delivery, SIMD and maternal first antenatal visit. In  
54  
55 186 addition to these confounders, individual outcomes were adjusted for relevant  
56  
57  
58  
59  
60

1  
2  
3 187 cofactors. Gestation at delivery and pregnancy outcome were both additionally  
4  
5 188 adjusted for maternal hypertensive disorders and antepartum haemorrhage. Weight  
6  
7 189 of the baby, neonatal unit admission, cryptorchidism, neural tube defects, amniotic  
8  
9 190 band defects, hypospadias and gastroschisis variables were also adjusted for  
10  
11 191 gestation at delivery. APGAR score at one and five minutes were adjusted for type of  
12  
13 192 delivery. A p-value of less than 0.05 was considered statistically significant. All  
14  
15 193 statistical analyses were carried out using IBM SPSS Statistics version 25.0  
16  
17 194 (Released 2017. IBM SPSS Statistics for Windows, Armonk, NY: IBM Corp.). R  
18  
19 195 version 3.6.2 was used to generate Figure 2. Numbers needed to harm (NNH) were  
20  
21 196 also calculated for each outcome and are provided in Supplementary Tables 1 and  
22  
23 197 2.  
24  
25  
26  
27  
28  
29  
30  
31  
32  
33  
34  
35  
36  
37  
38  
39  
40  
41  
42  
43  
44  
45  
46  
47  
48  
49  
50  
51  
52  
53  
54  
55  
56  
57  
58  
59  
60



## 198 **Results**

199 Overall, from the total 151,141 pregnancies across 30 years in 107,143 (70.9%)  
200 pregnancies, no over-the-counter analgesic consumption was reported. At least one  
201 over-the-counter analgesic was consumed in 43,998 (29.1%) pregnancies, whereas  
202 paracetamol use alone was reported in 24,099 (18.4%) pregnancies. Diclofenac use  
203 was observed in 20.0% of pregnancies in the 10-year period when diclofenac was  
204 available over-the-counter (without prescription). Finally, at least one out of three  
205 analgesics (naproxen, ibuprofen, aspirin) was consumed in 762 (0.7%) pregnancies  
206 (Figure 1). At their first antenatal clinic visit, 83.7% of women taking over-the-counter  
207 analgesics reported use in the first trimester of pregnancy.

208 Prevalence of use for all five analgesics increased dramatically over the 30-year  
209 study period (1985-2015) (Figure 2). Pregnancies with consumption of at least one  
210 analgesic increased from 1.8% in 1985 to 70.6% in 2015. Pregnancies reporting  
211 paracetamol use were 1.3% in 1985 and it continuously increased reaching 42.2% in  
212 2015. Naproxen, ibuprofen or aspirin consumption during pregnancy was less  
213 prevalent (Figure 2A), however it also increased during the 30-year study period,  
214 starting at 0.5% in 1985 and reaching 1.9% in 2015 (Figure 2B). Diclofenac was  
215 consumed in very few pregnancies between 1985 (<0.01%) and 2005 (0.2%).  
216 Percentage of consumption, however, dramatically increased during the next decade  
217 following deregulation of diclofenac, reaching 25.0% in just one year (2006) and  
218 45.6% of all pregnancies in 2015.

219 Table 1 compares the baseline characteristics between the unexposed group of  
220 pregnancies where no analgesic was consumed and each of the exposure groups. In  
221 most, but not all, comparisons across all four analyses, there was a statistically

1  
2  
3 222 significant difference ( $p < 0.001$ ) for most variables. In the paracetamol sub-group  
4  
5 223 analysis, baby presentation at delivery ( $p = 0.525$ ) and sex of the baby ( $p = 0.861$ ) were  
6  
7 224 not significantly different between the groups. In the analysis considering  
8  
9 225 consumption of at least one analgesic from aspirin/naproxen/ibuprofen, again the  
10  
11 226 variables for baby presentation at delivery ( $p = 0.093$ ) and sex of the baby ( $p = 0.732$ ),  
12  
13 227 together with maternal smoking status ( $p = 0.132$ ) and maternal antepartum  
14  
15 228 haemorrhage ( $p = 0.434$ ) were not statistically different compared to the unexposed  
16  
17 229 group. All variables were statistically different between unexposed and exposed  
18  
19 230 groups for the main analysis and diclofenac sub-group analysis.  
20  
21  
22  
23

24 231 Table 2 summarises the comparison of neonatal outcomes between the unexposed  
25  
26 232 group (no analgesic at all) and the exposed groups of at least one analgesic, only  
27  
28 233 paracetamol and at least one out of aspirin/naproxen/ibuprofen. Comparison of  
29  
30 234 outcomes for the diclofenac sub-group analysis is shown in Table 3.  
31  
32  
33

34 235

### 37 236 **All analgesics and neonatal outcomes**

38  
39  
40 237 As shown in Table 2, compared to unexposed pregnancies in which women did not  
41  
42 238 use any analgesic, pregnancies with consumption of at least one analgesic  
43  
44 239 (paracetamol, diclofenac, aspirin, naproxen, ibuprofen) were independently  
45  
46 240 associated with significantly higher odds for premature delivery (aOR=1.50, 95%CI  
47  
48 241 1.43-1.58), stillbirth (aOR=1.33, 95%CI 1.15-1.54), LBW (aOR=1.28, 95%CI 1.20-  
49  
50 242 1.37), HBW (aOR=1.09, 95%CI 1.05-1.13), baby admission to neonatal unit  
51  
52 243 (aOR=1.57, 95%CI 1.51-1.64), APGAR score  $< 7$  at five minutes (aOR=1.48, 95%CI  
53  
54 244 1.35-1.62), neural tube defects (aOR=1.64, 95%CI 1.08-2.47) and hypospadias  
55  
56 245 (aOR=1.27, 95%CI 1.05-1.54) in adjusted analyses. Significantly decreased odds for  
57  
58  
59  
60

1  
2  
3 246 APGAR score <7 at one minute were found in the crude analysis (cOR=0.96, 95%CI  
4  
5 247 0.92-0.99), however when adjusted for year of delivery, maternal age at delivery,  
6  
7 248 SIMD, first gestational booking and type of delivery, the significance changed  
8  
9 249 direction showing significantly increased odds (aOR=1.18, 95%CI 1.13-1.23). A  
10  
11 250 significantly lower standardised birthweight score (p=0.046, 95%CI 0.032-0.059) was  
12  
13 251 found for the exposure group compared to no analgesic at all. Cryptorchidism  
14  
15 252 (aOR=0.92, 95%CI 0.77-1.11), amniotic band defects (aOR=1.02, 95%CI 0.71-1.47),  
16  
17 253 gastroschisis (aOR=1.10, 95%CI 0.56-2.20) and the composite outcome variable  
18  
19 254 (aOR=1.12, 95%CI 0.99-1.26), were all associated with increased odds in the  
20  
21 255 exposure group compared to not exposed, however the association was not  
22  
23 256 significant in the adjusted model. There was no significant association between  
24  
25 257 neonatal death and exposure to at least one analgesic in the crude analysis  
26  
27 258 (cOR=1.19, 95%CI 0.99-1.42), however there were significantly higher odds of  
28  
29 259 neonatal death in the adjusted analysis (aOR=1.56, 95%CI 1.27-1.93) in the  
30  
31 260 exposed group compared to control.  
32  
33  
34  
35  
36  
37  
38  
39  
40

## 262 **Paracetamol and neonatal outcomes**

263 In the sub-group analysis considering only paracetamol consumption during  
264 pregnancy as our exposure group, most of the associations reported in the main  
265 analysis remained significant with the same direction of significance (Table 2). The  
266 differences were: maternal paracetamol consumption during pregnancy was  
267 associated with significantly decreased odds for offspring HBW (cOR=0.94, 95%CI  
268 0.90-0.99) in the crude analysis however significance was lost in the adjusted model  
269 (aOR=0.98, 95%CI 0.93-1.02), and there were no significant associations in the  
270

270 adjusted models for neural tube defects (aOR=1.21, 95%CI 0.71-2.06) and  
271 hypospadias (aOR=1.07, 95%CI 0.84-1.37).

272

### 273 **Aspirin/naproxen/ibuprofen and neonatal outcomes**

274 Consumption of at least one analgesic from aspirin, naproxen or ibuprofen during  
275 pregnancy was compared against the same control group of pregnancies where no  
276 analgesic was used (Table 2). Again, when comparing associations between groups  
277 in this sub-group analysis and main analysis, fewer outcome variants showed similar  
278 significance pattern. The only shared significant associations were for increased  
279 odds for premature delivery (aOR=1.42, 95%CI 1.08-1.86), stillbirth (aOR=2.34,  
280 95%CI 1.29-4.25) and baby admission to neonatal unit (aOR=1.54, 95%CI 1.22-  
281 1.94) in the adjusted regression analyses.

282

### 283 **Diclofenac and neonatal outcomes**

284 In the sub-group analysis of pregnancies coinciding with non-prescription, over-the-  
285 counter, availability of diclofenac (years 2005-2015) were considered, and outcomes  
286 compared between the diclofenac group and no analgesic consumption group (Table  
287 3). Compared to the main analysis, diclofenac consumption during pregnancy was  
288 not significantly associated with premature delivery (aOR=1.10, 95%CI 0.99-1.22),  
289 neonatal death (aOR=1.26, 95%CI 0.73-2.15) and APGAR score <7 in one minute  
290 (aOR=0.93, 95%CI 0.83-1.04) in the adjusted models. Associations with APGAR  
291 score <7 in five minutes (aOR=0.94, 95%CI 0.72-1.23), cryptorchidism (aOR=1.05,  
292 95%CI 0.78-1.42), amniotic band defects (aOR=0.81, 95%CI 0.41-1.58) and  
293 gastroschisis (aOR=2.93, 95%CI 0.97-8.88) were no longer significant in both crude

1  
2  
3 294 and adjusted analyses. Maternal consumption of diclofenac was independently  
4  
5 295 associated with a significant decrease in stillbirth (aOR=0.59, 95%CI 0.41-0.87). It is  
6  
7  
8 296 also interesting to note that diclofenac was the only sub-group analysis agreeing with  
9  
10 297 the main analysis (exposure to at least one analgesic) on the significance of  
11  
12 298 exposure association with increased incidence of neural tube defects (aOR=3.62,  
13  
14 299 95%CI 1.95-6.74) and hypospadias (aOR=1.49, 95%CI 1.09-2.03) compared to  
15  
16  
17 300 unexposed pregnancies in adjusted models. As most of the outcomes studied were  
18  
19 301 relatively rare the numbers needed to harm were mostly more than 100. Preterm  
20  
21 302 birth, low birthweight and admission to the neonatal unit were exceptions with NNH  
22  
23  
24 303 ranging from 15 to 38. (Tables S1 and S2).  
25  
26  
27  
28  
29  
30  
31  
32  
33  
34  
35  
36  
37  
38  
39  
40  
41  
42  
43  
44  
45  
46  
47  
48  
49  
50  
51  
52  
53  
54  
55  
56  
57  
58  
59  
60

## 304 Discussion

### 305 Main Findings

306 Consumption of paracetamol, ibuprofen, aspirin and naproxen during pregnancy,  
307 either in combination or separately, was significantly associated with increased  
308 premature delivery, stillbirth, neonatal death, LBW, abnormal standardised  
309 birthweight score and more frequent admission to neonatal unit. Consumption of  
310 paracetamol alone was further associated with higher odds for APGAR score <7 at  
311 one and five minutes both in crude and adjusted analyses. There was a dramatic  
312 increase in the frequency of over-the-counter (non-prescription) analgesic use in  
313 pregnancies between 1985 and 2015, starting from only 10.3% of women using one  
314 or more of the compounds between 1985 and 1994, climbing to 60.1% of women in  
315 the final decade of our study. This means that our findings are applicable far beyond  
316 the percentage (between 14% and 38%)<sup>26</sup> of pregnant women with underlying  
317 health deficits related to the adverse outcomes we report here.

318

319 Diclofenac use increased steeply from 2005 (Figure 2A), which reflects the change in  
320 Scottish legislation, leading to diclofenac becoming available without prescription in  
321 that year. Diclofenac use was associated with fewer adverse outcomes but showed  
322 increased risk of neural tube defects and hypospadias in male neonates.

323 Furthermore, and surprisingly, exposure to diclofenac only was associated with  
324 significant decrease in the incidence of stillbirth. The reasons for such differences  
325 between the changes in neonatal outcomes following diclofenac consumption  
326 compared with those following use of the other NSAIDs are not clear. The proportion  
327 of women using diclofenac, especially in the last 7 years of our study makes it highly

1  
2  
3 328 unlikely to be due to an underlying maternal condition and/or other compounds used  
4  
5 329 in combination (e.g. prescriptions) by women taking diclofenac. It is possible that the  
6  
7 330 drug could act directly on fetal development then this difference could also be due to  
8  
9 331 structural and/or mechanistic differences of the compound compared to the other  
10  
11 332 drugs. However, not enough is known about the specific mechanisms of action of the  
12  
13 333 different analgesics studied to conclude further. Overall, comparing our main  
14  
15 334 analysis with all three sub-analyses, it is evident that the most significant differences  
16  
17 335 were observed when paracetamol was taken with at least one other analgesic. This  
18  
19 336 is mostly due to the high number of pregnancies where paracetamol was used,  
20  
21 337 comprising almost 55% of the exposed cases in the main analysis. Most numbers  
22  
23 338 needed to harm for our outcomes (Tables S1 and S2) ranged between 1000 and  
24  
25 339 100, apart from preterm birth, low birth weight and baby admission to neonatal unit,  
26  
27 340 which were 27, 38 and 15 respectively for our main analysis further strengthening  
28  
29 341 observed associations.  
30  
31  
32  
33  
34  
35  
36  
37  
38

342

### 39 **Strengths and Limitations**

40  
41  
42 344 A major strength of the present study is the large cohort of 151,141 pregnancies over  
43  
44 345 a 30-year study period from 1985 until 2015, using a robust data source AMND. This  
45  
46 346 is one of the largest cohorts used in studies examining the effects of analgesic use  
47  
48 347 during pregnancy. The dataset contains high quality and consistent data from the  
49  
50 348 geographically defined area of Aberdeen and surrounding district, in the North East  
51  
52 349 of Scotland, UK. In addition, as Aberdeen Maternity Hospital is the only maternity  
53  
54 350 hospital serving the area, over 95% of pregnancies in the area are included in the  
55  
56 351 dataset, considerably minimizing the risk for selection bias. We were able to analyse  
57  
58  
59  
60



1  
2  
3 352 maternal consumption data of the five most commonly used analgesics available  
4  
5 353 over-the-counter in the UK and most countries, which is not matched in the current  
6  
7 354 literature. The nature of our data allowed for the analysis of analgesics consumed  
8  
9 355 alone or in combination, unlike most existing studies, and this gives our study the  
10  
11 356 added strength of better reflecting real-life consumption patterns<sup>27,28</sup>. We were able  
12  
13 357 to adjust for important confounding factors, relevant to each analysed outcome.  
14  
15 358 Adjustment for maternal deprivation also allowed us to further account for potential  
16  
17 359 unmeasured factors that can influence maternal and neonatal health, which is a  
18  
19 360 major strength of our analysis compared to most studies.

20  
21  
22  
23  
24 361 A potential concern was that women were probably using analgesics to treat some  
25  
26 362 inherent medical condition which in turn could have been the mediating factor for  
27  
28 363 adverse outcomes. Data on indication for use were not available in the database.  
29  
30 364 However, since these medications are widely available without prescription, this is  
31  
32 365 unlikely to be a factor that affects the findings of this study. This is especially the  
33  
34 366 case during the “diclofenac analysis” covering 2005-2015, where  
35  
36  
37  
38 367 this study presents results on multiple neonatal outcomes for the given cohort. In this  
39  
40 368 way we offer a comprehensive approach to the exploration of associations with *in*  
41  
42 369 *utero* analgesic exposure rather than only focusing on a single outcome of interest.  
43  
44 370 Our data were based on medical notes; however, over-the-counter consumption is  
45  
46 371 self-reported, and details on the timing, duration, dosage, product type (single-  
47  
48 372 ingredient vs combination) and administration type were not available in the  
49  
50 373 database. In addition, the group of pregnancies with aspirin consumption might  
51  
52 374 include use of low-dose aspirin which is recommended to help reduce risk of some  
53  
54 375 pregnancy complications and outcomes related to placental function. Genetic factors  
55  
56 376 potentially relating to the emergence of offspring health outcomes was an



1  
2  
3 377 unmeasured variable in our analysis. This study does not include a quantitative bias  
4  
5 378 analysis to identify potential distort of results presented here. Most women had their  
6  
7 379 first antenatal clinic visit during the 1<sup>st</sup> pregnancy trimester, which might imply our  
8  
9 380 results were affected by primarily 1<sup>st</sup> trimester exposure, although analgesic use in  
10  
11 381 first trimester is most likely replicated in the rest of pregnancy. Complete case  
12  
13 382 analyses were performed ignoring pregnancies with missing data in the covariates,  
14  
15 383 however due to the low number of missing data there is little chance that this might  
16  
17 384 have affected the validity of our results. Compared to our cohort size, there were,  
18  
19 385 overall, very few cases of cryptorchidism, neural tube defects, amniotic band defects,  
20  
21 386 hypospadias and gastroschisis, resulting in potentially underpowered statistical  
22  
23 387 analyses to detect a difference for these outcomes. Our study only considered  
24  
25 388 neonatal health outcomes and follow-up of the offspring was not available at this  
26  
27 389 time.  
28  
29  
30  
31  
32  
33  
34  
35  
36

### 37 **Interpretation**

38  
39 392 Previous literature has considered fewer outcomes with fewer analgesic  
40  
41 393 combinations compared to our study. Consistent with our results, increased risk of  
42  
43 394 preterm birth and miscarriage has been associated with analgesic consumption  
44  
45 395 during pregnancy <sup>29–32</sup>, while others reported no associations with miscarriage,  
46  
47 396 stillbirth or preterm delivery <sup>20,29,30,33</sup>. Similarly, increased risk for offspring  
48  
49 397 cryptorchidism, hypospadias, neural tube defects, amniotic band defects and  
50  
51 398 gastroschisis have been shown by many studies <sup>7,8,9,34–41</sup>, although, again, a lack of  
52  
53 399 associations with major birth defects have been reported <sup>13–17,42,43</sup>. Compared to our  
54  
55 400 analysis, all these studies used a smaller cohort, considered a shorter study time  
56  
57  
58  
59  
60

1  
2  
3 401 and there was frequent disagreement with respect to the choices of adjusted  
4  
5 402 confounding factors. Another difference is that maternal questionnaires/interviews  
6  
7 403 were frequently the method of choice to evaluate maternal consumption. Some of  
8  
9 404 the studies reported increased risks for specific pregnancy trimesters which is  
10  
11 405 something our study could not evaluate. Differences in study design and adjustment  
12  
13 406 for different confounders might also account for the disagreement of our results that  
14  
15 407 provide a more accurate assessment. Our study is one of the largest in terms of  
16  
17 408 cohort size, duration, number of analgesics and range of outcomes included which  
18  
19 409 might also contribute to differences compared to other studies. Another study with a  
20  
21 410 large sample size (98,190 pregnancies) and a 7 year study time from Rebordosa and  
22  
23 411 colleagues<sup>29</sup>, also reported an increased risk of preterm birth following paracetamol  
24  
25 412 use during pregnancy, which was increased in mothers with pre-eclampsia. Our  
26  
27 413 results showed a significant association of the adjusted ORs following adjustment for  
28  
29 414 maternal hypertensive disorders. In addition, they did not find a significant  
30  
31 415 association with stillbirth, or low birth weight as we report here. This disagreement  
32  
33 416 could be due to dataset differences including the information about use in each  
34  
35 417 pregnancy trimester, but also methodological differences such as the use of  
36  
37 418 questionnaires versus medical notes or adjustment for different confounders.  
38  
39  
40  
41  
42  
43  
44  
45 419 The literature currently reports conflicting evidence, limiting our ability for definite  
46  
47 420 decision-making. Over-the-counter analgesics are recommended to women by  
48  
49 421 healthcare professionals in order to deal with pregnancy symptoms and other  
50  
51 422 conditions. Policy-makers have taken a stand on the topic, either being reassuring  
52  
53 423 about over-the-counter use during pregnancy or recommending caution when  
54  
55 424 consumption is necessary <sup>44-47</sup>. Different compounds can affect the mother and the  
56  
57 425 fetus in a different way, and their combined use might worsen the risk for offspring ill  
58  
59  
60

1  
2  
3 426 health. This study demonstrates the need for additional research before the field can  
4  
5 427 be confidently directed towards one direction or the other.  
6  
7

8 428 Whether the associations we report result from flu, fever, rheumatological or  
9  
10 429 inflammatory conditions, and/or combination with other prescribed medications or  
11  
12 430 solely related to over-the-counter analgesics consumption is a matter of further  
13  
14 431 research. Underlying health conditions could well influence the outcomes we see in  
15  
16 432 this study, however, as these could be very different conditions it is biologically  
17  
18 433 unlikely that they are responsible for the effects we observe here. Our study  
19  
20 434 demonstrates an association of maternal over-the-counter analgesic consumption  
21  
22 435 during pregnancy with adverse neonatal offspring outcomes. Future collaborative  
23  
24 436 approaches such as an individual patient data meta-analysis that includes follow-up  
25  
26 437 data on long-term outcomes during childhood and adulthood would significantly  
27  
28 438 inform decision making. Going forward, uncovering the mechanisms of action and off  
29  
30 439 target effects will also provide a solid foundation for the development of pregnancy-  
31  
32 440 safe compounds. Finally, the findings present here suggest that diclofenac is  
33  
34 441 associated with fewer changes in risk for the more frequent adverse outcomes  
35  
36 442 although it is associated more with rarer, but severe, negative outcomes, including  
37  
38 443 neural tube defects. Diclofenac may have a lower risk for the main adverse neonatal  
39  
40 444 outcomes reported for paracetamol. However, it should be noted that our study is not  
41  
42 445 designed to specifically test differences in level of risk between the analgesics  
43  
44 446 included. Therefore, it should be emphasised that this does not mean that the  
45  
46 447 authors are stating that diclofenac is preferable to paracetamol.  
47  
48  
49  
50  
51  
52  
53  
54  
55  
56  
57

58 449 **Conclusions**  
59  
60

1  
2  
3 450 Pain control is currently a therapeutic priority during pregnancy. Our findings of  
4  
5 451 increased risk of adverse health outcomes for the offspring following at least first  
6  
7 452 trimester maternal use of readily available over-the-counter analgesics are crucial to  
8  
9 453 information for the management of pain during pregnancy.  
10  
11  
12

13 454

15  
16 455 **Acknowledgements:** N/A  
17  
18

19 456 **Disclosure of interests:** Professor David Hay is a founder, director and shareholder  
20  
21 457 in Stemnovate Limited. The remaining authors have no interests to disclose.  
22  
23

24 458 **Contribution to Authorship:** AZ, SB and PAF contributed to the conception, design  
25  
26 459 and coordination of the research. EAR provided critical input in the design and  
27  
28 460 planning of statistical analysis. AZ conducted the statistical analysis and prepared  
29  
30 461 the manuscript, figures and tables. AZ, SB, PAF, RTM and DCH substantially  
31  
32 462 contributed to the analysis and interpretation of the work. All authors contributed to  
33  
34 463 critical discussion of intellectual content, development and review/approval of the  
35  
36 464 final manuscript version.  
37  
38  
39  
40

41 465 **Funding:** This work is supported by the Biotechnology and Biological Sciences  
42  
43 466 Research council (BBSRC) funding the lead author under the EASTBIO doctoral  
44  
45 467 training programme and to PAF, the EU Horizon 2020 project FREIA (Grant Number  
46  
47 468 825100). RTM is supported by MRC Centre for Reproductive Health Grant  
48  
49 469 MR/N022556/1. The funders had no role in study design, data collection, data  
50  
51 470 analysis, decision to publish, or manuscript preparation.  
52  
53  
54

55 471 **Ethics Statement:** The AMND dataset used in this study was fully anonymised,  
56  
57 472 therefore there was no requirement for ethical approval. The North of Scotland  
58  
59 473 Research Ethics Service has devolved Caldicott approval to the Chair of the AMND  
60

1  
2  
3 474 steering committee. Approval to access and analyse data was obtained from the  
4  
5 475 AMND steering Committee (AMND 004/2018).  
6  
7

8 476 **Data Availability Statement:** No additional data available.  
9  
10  
11  
12  
13  
14  
15  
16  
17  
18  
19  
20  
21  
22  
23  
24  
25  
26  
27  
28  
29  
30  
31  
32  
33  
34  
35  
36  
37  
38  
39  
40  
41  
42  
43  
44  
45  
46  
47  
48  
49  
50  
51  
52  
53  
54  
55  
56  
57  
58  
59  
60

For peer review only

477 **References**

- 478 1. Gendron M-P, Martin B, Oraichi D, Berard A. Health care providers' requests  
479 to Teratogen Information Services on medication use during pregnancy and  
480 lactation. *Eur J Clin Pharmacol*. 2009;65(5):523-531. doi:10.1007/s00228-008-  
481 0611-6
- 482 2. Mitchell AA, Gilboa SM, Werler MM, Kelley KE, Louik C, Hernández-Díaz S.  
483 Medication use during pregnancy, with particular focus on prescription drugs:  
484 1976-2008. *Am J Obstet Gynecol*. 2011;205(1):51.e1-51.e8.  
485 doi:10.1016/j.ajog.2011.02.029
- 486 3. Werler MM, Mitchell AA, Hernandez-Diaz S, Honein MA. Use of over-the-  
487 counter medications during pregnancy. *Am J Obstet Gynecol*.  
488 2005;193(3):771-777. doi:10.1016/j.ajog.2005.02.100
- 489 4. Glover DD, Amonkar M, Rybeck BF, Tracy TS. Prescription, over-the-counter,  
490 and herbal medicine use in a rural, obstetric population. *Am J Obstet Gynecol*.  
491 2003;188(4):1039-1045. doi:10.1067/mob.2003.223
- 492 5. Lupattelli A, Spigset O, Twigg MJ, et al. Medication use in pregnancy: A cross-  
493 sectional, multinational web-based study. *BMJ Open*. 2014;4(2).  
494 doi:10.1136/bmjopen-2013-004365
- 495 6. Zafeiri A, Mitchell RT, Hay DC, Fowler PA. Over-the-counter analgesics during  
496 pregnancy: a comprehensive review of global prevalence and offspring safety.  
497 *Hum Reprod Update*. Published online October 29, 2020.  
498 doi:10.1093/humupd/dmaa042
- 499 7. Lynberg MC, Khoury MJ, Lu X, Cocian T. Maternal flu, fever, and the risk of

- 1  
2  
3 500 neural tube defects: A population-based case-control study. *Am J Epidemiol.*  
4  
5 501 1994;140(3):244-255. doi:10.1093/oxfordjournals.aje.a117243  
6  
7  
8 502 8. Werler MM, Louik C, Mitchell AA. Epidemiologic analysis of maternal factors  
9  
10 503 and amniotic band defects. *Birth Defects Res Part A - Clin Mol Teratol.*  
11  
12 504 2003;67(1):68-72. doi:10.1002/bdra.10001  
13  
14  
15  
16 505 9. Snijder CA, Kortenkamp A, Steegers EAP, et al. Intrauterine exposure to mild  
17  
18 506 analgesics during pregnancy and the occurrence of cryptorchidism and  
19  
20 507 hypospadias in the offspring: The Generation R Study. *Hum Reprod.*  
21  
22 508 2012;27(4):1191-1201. doi:10.1093/humrep/der474  
23  
24  
25  
26 509 10. Lind JN, Tinker SC, Broussard CS, et al. Maternal medication and herbal use  
27  
28 510 and risk for hypospadias: Data from the National Birth Defects Prevention  
29  
30 511 Study, 1997-2007. *Pharmacoepidemiol Drug Saf.* 2013;22(7):783-793.  
31  
32 512 doi:10.1002/pds.3448  
33  
34  
35  
36 513 11. Interrante JD, Ailes EC, Lind JN, et al. Risk comparison for prenatal use of  
37  
38 514 analgesics and selected birth defects, National Birth Defects Prevention Study  
39  
40 515 1997–2011. *Ann Epidemiol.* 2017;27(10):645-653.e2.  
41  
42 516 doi:10.1016/j.annepidem.2017.09.003  
43  
44  
45  
46 517 12. Philippat C, Gorgis-Allemand L, Chevrier C, et al. Analgesics during pregnancy  
47  
48 518 and undescended testis. *Epidemiology.* 2011;22(5):747-749.  
49  
50 519 doi:10.1097/EDE.0b013e318225bf33  
51  
52  
53 520 13. Hernandez RK, Werler MM, Romitti P, Sun L, Anderka M. Nonsteroidal  
54  
55 521 antiinflammatory drug use among women and the risk of birth defects. In:  
56  
57 522 *American Journal of Obstetrics and Gynecology.* Vol 206. Mosby Inc.;  
58  
59 523 2012:228.e1-228.e8. doi:10.1016/j.ajog.2011.11.019

- 1  
2  
3 524 14. Cassina M, De Santis M, Cesari E, et al. First trimester diclofenac exposure  
4 and pregnancy outcome. *Reprod Toxicol*. 2010;30(3):401-404.  
5  
6 525  
7  
8 526 doi:10.1016/j.reprotox.2010.04.010  
9  
10  
11 527 15. Padberg S, Tissen-Diabaté T, Dathe K, et al. Safety of diclofenac use during  
12 early pregnancy: A prospective observational cohort study. *Reprod Toxicol*.  
13 528 2018;77:122-129. doi:10.1016/j.reprotox.2018.02.007  
14  
15 529  
16  
17  
18 530 16. van Gelder MMHJ, Roeleveld N, Nordeng H. Exposure to non-steroidal anti-  
19 inflammatory drugs during pregnancy and the risk of selected birth defects: A  
20 531 prospective cohort study. *PLoS One*. 2011;6(7).  
21  
22 532  
23  
24 533 doi:10.1371/journal.pone.0022174  
25  
26  
27  
28 534 17. Dathe K, Fietz AK, Pritchard LW, et al. No evidence of adverse pregnancy  
29 outcome after exposure to ibuprofen in the first trimester – Evaluation of the  
30 535 national Embryotox cohort. *Reprod Toxicol*. 2018;79:32-38.  
31  
32 536  
33 537 doi:10.1016/j.reprotox.2018.05.003  
34  
35  
36  
37  
38 538 18. Pariente G, Leibson T, Carls A, Adams-Webber T, Ito S, Koren G. Pregnancy-  
39 Associated Changes in Pharmacokinetics: A Systematic Review. Chappell LC,  
40 539 ed. *PLoS Med*. 2016;13(11):e1002160. doi:10.1371/journal.pmed.1002160  
41  
42 540  
43  
44  
45 541 19. McElhatton PR, Sullivan FM, Volans GN. Paracetamol overdose in pregnancy  
46 analysis of the outcomes of 300 cases referred to the teratology information  
47 542 service. *Reprod Toxicol*. 1997;11(1):85-94. doi:10.1016/S0890-  
48 543 6238(96)00200-6  
49  
50 544  
51  
52  
53  
54  
55 545 20. Kozer E, Costei AM, Boskovic R, Nulman I, Nikfar S, Koren G. Effects of  
56 aspirin consumption during pregnancy on pregnancy outcomes: Meta-analysis.  
57 546  
58 547 *Birth Defects Res Part B - Dev Reprod Toxicol*. 2003;68(1):70-84.



- 1  
2  
3 548 doi:10.1002/bdrb.10002  
4  
5  
6 549 21. Nitsche JF, Patil AS, Langman LJ, et al. Transplacental Passage of  
7  
8 550 Acetaminophen in Term Pregnancy. *Am J Perinatol*. 2017;34(6):541-543.  
9  
10 551 doi:10.1055/s-0036-1593845  
11  
12  
13 552 22. Bauer AZ, Swan SH, Kriebel D, et al. Paracetamol use during pregnancy — a  
14  
15 553 call for precautionary action. *Nat Rev Endocrinol*. 2021;17(12):757-766.  
16  
17 554 doi:10.1038/s41574-021-00553-7  
18  
19  
20  
21 555 23. Ayorinde AA, Wilde K, Lemon J, Campbell D, Bhattacharya S. Data resource  
22  
23 556 profile: The Aberdeen Maternity and Neonatal Databank (AMND). *Int J*  
24  
25 557 *Epidemiol*. 2016;45(2):389-394. doi:10.1093/ije/dyv356  
26  
27  
28  
29 558 24. Campbell D, Hall M, Lemon J, Carr-Hill R, Pritchard C, Samphier M. Clinical  
30  
31 559 birthweight standards for a total population in the 1980s. *BJOG An Int J Obstet*  
32  
33 560 *Gynaecol*. 1993;100(5):436-445. doi:10.1111/j.1471-0528.1993.tb15268.x  
34  
35  
36 561 25. Textor J, van der Zander B, Gilthorpe MS, Liškiewicz M, Ellison GT. Robust  
37  
38 562 causal inference using directed acyclic graphs: The R package “dagitty.” *Int J*  
39  
40 563 *Epidemiol*. 2016;45(6):1887-1894. doi:10.1093/ije/dyw341  
41  
42  
43  
44 564 26. Royal College of Obstetricians and Gynaecologists. RCOG review clarifies  
45  
46 565 pain relief options for women during pregnancy and breastfeeding. Published  
47  
48 566 2018. Accessed November 20, 2020. [https://www.rcog.org.uk/en/news/new-](https://www.rcog.org.uk/en/news/new-rcog-review-clarifies-pain-relief-options-for-women-during-pregnancy-and-breastfeeding/)  
49  
50 567 [rcog-review-clarifies-pain-relief-options-for-women-during-pregnancy-and-](https://www.rcog.org.uk/en/news/new-rcog-review-clarifies-pain-relief-options-for-women-during-pregnancy-and-breastfeeding/)  
51  
52 568 [breastfeeding/](https://www.rcog.org.uk/en/news/new-rcog-review-clarifies-pain-relief-options-for-women-during-pregnancy-and-breastfeeding/)  
53  
54  
55  
56 569 27. Sarganas G, Buttery AK, Zhuang W, et al. Prevalence, trends, patterns and  
57  
58 570 associations of analgesic use in Germany. *BMC Pharmacol Toxicol*.

- 1  
2  
3 571 2015;16(1). doi:10.1186/s40360-015-0028-7  
4  
5  
6 572 28. Hider-Mlynarz K, Cavalié P, Maison P. Trends in analgesic consumption in  
7  
8 573 France over the last 10 years and comparison of patterns across Europe. *Br J*  
9  
10 574 *Clin Pharmacol*. 2018;84(6):1324-1334. doi:10.1111/bcp.13564  
11  
12  
13  
14 575 29. Rebordosa C, Kogevinas M, Bech BH, Sørensen HT, Olsen J. Use of  
15  
16 576 acetaminophen during pregnancy and risk of adverse pregnancy outcomes. *Int*  
17  
18 577 *J Epidemiol*. 2009;38(3):706-714. doi:10.1093/ije/dyp151  
19  
20  
21 578 30. Nielsen GL, Sørensen HT, Larsen H, Pedersen L. Risk of adverse birth  
22  
23 579 outcome and miscarriage in pregnant users of non-steroidal anti-inflammatory  
24  
25 580 drugs: Population based observational study and case-control study. *Br Med J*.  
26  
27 581 2001;322(7281):266-270. doi:10.1136/bmj.322.7281.266  
28  
29  
30  
31 582 31. Czeizel AE, Dudá I, Puhó E. Short-term paracetamol therapy during pregnancy  
32  
33 583 and a lower rate of preterm birth. *Paediatr Perinat Epidemiol*. 2005;19(2):106-  
34  
35 584 111. doi:10.1111/j.1365-3016.2005.00631.x  
36  
37  
38  
39 585 32. Li Z, Ren A, Liu J, et al. Maternal flu or fever, medication use, and neural tube  
40  
41 586 defects: A population-based case-control study in northern China. *Birth*  
42  
43 587 *Defects Res Part A - Clin Mol Teratol*. 2007;79(4):295-300.  
44  
45 588 doi:10.1002/bdra.20342  
46  
47  
48  
49 589 33. Pastore LM, Hertz-Picciotto I, Beaumont JJ. Risk of stillbirth from medications,  
50  
51 590 illnesses and medical procedures. *Paediatr Perinat Epidemiol*. 1999;13(4):421-  
52  
53 591 430. doi:10.1046/j.1365-3016.1999.00196.x  
54  
55  
56 592 34. Kristensen DM, Hass U, Lesn L, et al. Intrauterine exposure to mild analgesics  
57  
58 593 is a risk factor for development of male reproductive disorders in human and  
59  
60

- 1  
2  
3 594 rat. *Hum Reprod*. 2011;26(1):235-244. doi:10.1093/humrep/deq323  
4  
5  
6 595 35. Jensen MS, Rebordosa C, Thulstrup AM, et al. Maternal use of  
7  
8 596 acetaminophen, ibuprofen, and acetylsalicylic acid during pregnancy and risk  
9  
10 597 of cryptorchidism. *Epidemiology*. 2010;21(6):779-785.  
11  
12 doi:10.1097/EDE.0b013e3181f20bed  
13 598  
14  
15  
16 599 36. Correy JF, Newman NM, Collins JA, Burrows EA, Burrows RF, Curran JT. Use  
17  
18 600 of prescription drugs in the first trimester and congenital malformations. *Aust N*  
19  
20 601 *Z J Obs Gynaecol*. 1991;31(4):340-344.  
21  
22 http://www.ncbi.nlm.nih.gov/pubmed/1799347  
23 602  
24  
25  
26 603 37. Lind DV, Main KM, Kyhl HB, et al. Maternal use of mild analgesics during  
27  
28 604 pregnancy associated with reduced anogenital distance in sons: A cohort  
29  
30 605 study of 1027 mother-child pairs. *Hum Reprod*. 2017;32(1):223-231.  
31  
32 606 doi:10.1093/humrep/dew285  
33  
34  
35  
36 607 38. Werler MM, Mitchell AA, Shapiro S. First trimester maternal medication use in  
37  
38 608 relation to gastroschisis. *Teratology*. 1992;45(4):361-367.  
39  
40 609 doi:10.1002/tera.1420450407  
41  
42  
43  
44 610 39. Torfs CP, Katz EA, Bateson TF, Lam PK, Curry CJR. Maternal medications  
45  
46 611 and environmental exposures as risk factors for gastroschisis. *Teratology*.  
47  
48 612 1996;54(2):84-92. doi:10.1002/(SICI)1096-9926(199606)54:2<84::AID-  
49  
50 613 TERA4>3.0.CO;2-4  
51  
52  
53 614 40. M. Werler M, Sheehan JE, Mitchell AA. Maternal medication use and risks of  
54  
55 615 gastroschisis and small intestinal atresia. *Am J Epidemiol*. 2002;155(1):26-31.  
56  
57 616 doi:10.1093/aje/155.1.26  
58  
59  
60

- 1  
2  
3 617 41. Kozer E, Nikfar S, Costei A, Boskovic R, Nulman I, Koren G. Aspirin  
4  
5 618 consumption during the first trimester of pregnancy and congenital anomalies:  
6  
7 619 A meta-analysis. *Am J Obstet Gynecol.* 2002;187(6):1623-1630.  
8  
9 620 doi:10.1067/mob.2002.127376  
10  
11  
12  
13 621 42. Slone D, Heinonen OP, Kaufman DW, Siskind V, Monson RR, Shapiro S.  
14  
15 622 ASPIRIN AND CONGENITAL MALFORMATIONS. *Lancet.*  
16  
17 623 1976;307(7974):1373-1375. doi:10.1016/S0140-6736(76)93025-7  
18  
19  
20 624 43. Shaw GM, Todoroff K, Velie EM, Lammer EJ. Maternal illness, including fever,  
21  
22 625 and medication use as risk factors for neural tube defects. *Teratology.*  
23  
24 626 1998;57(1):1-7. doi:10.1002/(SICI)1096-9926(199801)57:1<1::AID-  
25  
26 627 TERA1>3.0.CO;2-6  
27  
28  
29  
30 628 44. Mosley II JF, Smith LL, Dezan MD. An overview of upcoming changes in  
31  
32 629 pregnancy and lactation labeling information. *Pharm Pract (Granada).*  
33  
34 630 2015;13(2):605. doi:10.18549/pharmpract.2015.02.605  
35  
36  
37  
38 631 45. SMFM (Society for Maternal-Fetal Medicine Publications Committee). Prenatal  
39  
40 632 acetaminophen use and outcomes in children. *Am J Obstet Gynecol.*  
41  
42 633 2017;216(3):B14-B15. doi:10.1016/j.ajog.2017.01.021  
43  
44  
45  
46 634 46. Bisson DL, Newell SD, Laxton C. Antenatal and Postnatal Analgesia: Scientific  
47  
48 635 Impact Paper No. 59. *BJOG An Int J Obstet Gynaecol.* 2018;(59).  
49  
50 636 doi:10.1111/1471-0528.15510  
51  
52  
53 637 47. RCOG. RCOG review clarifies pain relief options for women during pregnancy  
54  
55 638 and breastfeeding. Published 2018. Accessed November 1, 2019.  
56  
57 639 [https://www.rcog.org.uk/en/news/new-rcog-review-clarifies-pain-relief-options-](https://www.rcog.org.uk/en/news/new-rcog-review-clarifies-pain-relief-options-for-women-during-pregnancy-and-breastfeeding/)  
58  
59 640 [for-women-during-pregnancy-and-breastfeeding/](https://www.rcog.org.uk/en/news/new-rcog-review-clarifies-pain-relief-options-for-women-during-pregnancy-and-breastfeeding/)

1  
2  
3  
4  
5  
6  
7  
8  
9  
10  
11  
12  
13  
14  
15  
16  
17  
18  
19  
20  
21  
22  
23  
24  
25  
26  
27  
28  
29  
30  
31  
32  
33  
34  
35  
36  
37  
38  
39  
40  
41  
42  
43  
44  
45  
46  
47  
48  
49  
50  
51  
52  
53  
54  
55  
56  
57  
58  
59  
60

641

642

For peer review only

**Table 1.** Comparison of baseline characteristics between exposed (use of analgesics) and unexposed (no analgesic use) groups of pregnancies (P values <0.05 shown in bold).

| Baseline Characteristics        | No analgesic (n=107,143) n (%) | At least one analgesic (n=43,998) n (%) | P value <sup>†</sup> | Paracetamol only (n=24,099) n (%) | P value <sup>†</sup> | Ibuprofen/ Aspirin/ Naproxen (n=762) n (%) | P value <sup>†</sup> | No analgesic 2005-2015 (n=20,544) n (%) | Diclofenac only 2005-2015 (n=10,291) n (%) | P value <sup>‡</sup> |
|---------------------------------|--------------------------------|-----------------------------------------|----------------------|-----------------------------------|----------------------|--------------------------------------------|----------------------|-----------------------------------------|--------------------------------------------|----------------------|
| <b>Year of delivery</b>         |                                |                                         |                      |                                   |                      |                                            |                      |                                         |                                            |                      |
| 1985-1994                       | 50,152 (46.8)                  | 5,737 (13.0)                            | <b>&lt;0.001</b>     | 5,390 (22.4)                      | <b>&lt;0.001</b>     | 213 (28.0)                                 | <b>&lt;0.001</b>     | n/a                                     | n/a                                        | <b>&lt;0.001</b>     |
| 1995-2004                       | 36,447 (34.0)                  | 7,263 (16.5)                            |                      | 6,571 (27.3)                      |                      | 321 (42.1)                                 |                      | n/a                                     | n/a                                        |                      |
| 2005-2015 / 2005-2009 *         | 20,544 (19.2)                  | 30,998 (70.5)                           |                      | 12,138 (50.4)                     |                      | 228 (29.9)                                 |                      | n/a                                     | n/a                                        |                      |
| 2010-2015 *                     | n/a                            | n/a                                     |                      | n/a                               |                      | n/a                                        |                      | 11,105 (54.1)                           | 4,021 (39.1)                               |                      |
|                                 | n/a                            | n/a                                     |                      | n/a                               |                      | n/a                                        |                      | 9,439 (45.9)                            | 6,270 (60.9)                               |                      |
| <b>Maternal age at delivery</b> |                                |                                         |                      |                                   |                      |                                            |                      |                                         |                                            |                      |
| Younger than 20                 | 9,236 (8.6)                    | 3,834 (8.7)                             | <b>&lt;0.001</b>     | 2,936 (12.2)                      | <b>&lt;0.001</b>     | 34 (4.5)                                   | <b>&lt;0.001</b>     | 1,286 (6.3)                             | 311 (3.0)                                  | <b>&lt;0.001</b>     |
| 20-25                           | 24,249 (22.6)                  | 8,700 (19.8)                            |                      | 5,932 (24.6)                      |                      | 113 (14.8)                                 |                      | 3,436 (16.7)                            | 1,152 (11.2)                               |                      |
| 26-35                           | 63,499 (59.3)                  | 25,367 (57.7)                           |                      | 12,896 (53.5)                     |                      | 464 (60.9)                                 |                      | 12,664 (61.1)                           | 6,628 (64.4)                               |                      |
| Older than 35                   | 10,159 (9.5)                   | 6,097 (13.9)                            |                      | 2,335 (9.7)                       |                      | 151 (19.8)                                 |                      | 3,158 (15.4)                            | 2,200 (21.4)                               |                      |
|                                 |                                |                                         |                      |                                   |                      |                                            |                      |                                         |                                            |                      |
| <b>Previous Parity</b>          |                                |                                         |                      |                                   |                      |                                            |                      |                                         |                                            |                      |
| Nulliparity (0)                 | 48,684 (45.4)                  | 23,353 (53.1)                           | <b>&lt;0.001</b>     | 12,510 (51.9)                     | <b>&lt;0.001</b>     | 300 (39.4)                                 | <b>0.004</b>         | 8,336 (40.6)                            | 5,004 (48.6)                               | <b>&lt;0.001</b>     |
| Multiparity (1-11)              | 58,457 (54.6)                  | 20,639 (46.9)                           |                      | 11,587 (48.1)                     |                      | 462 (60.6)                                 |                      | 12,206 (59.4)                           | 5,284 (51.4)                               |                      |
| Missing                         | 2 (<0.1)§                      | 6 (<0.1)§                               |                      | 2 (<0.1)§                         |                      | 0 (0.0)§                                   |                      | 2 (<0.1)§                               | 3 (<0.1)§                                  |                      |
| <b>Maternal BMI</b>             |                                |                                         |                      |                                   |                      |                                            |                      |                                         |                                            |                      |
| Underweight (<18.5)             | 1,998 (2.4)                    | 869 (2.2)                               | <b>&lt;0.001</b>     | 545 (2.6)                         | <b>&lt;0.001</b>     | 10 (1.5)                                   | <b>0.007</b>         | 492 (2.7)                               | 174 (1.9)                                  | <b>&lt;0.001</b>     |
| Normal weight (18.5-24.9)       | 50,127 (60.8)                  | 18,958 (48.8)                           |                      | 10,486 (50.5)                     |                      | 361 (55.)                                  |                      | 10,239 (55.2)                           | 4,671 (50.0)                               |                      |
| Overweight (25.0-29.9)          | 20,500 (24.9)                  | 10,960 (28.2)                           |                      | 5,733 (27.6)                      |                      | 192 (29.5)                                 |                      | 4,930 (26.6)                            | 2,630 (28.1)                               |                      |
| Obese (≥ 30.0)                  | 9,773 (11.9)                   | 8,046 (20.7)                            |                      | 3,995 (19.2)                      |                      | 88 (13.5)                                  |                      | 2,881 (15.5)                            | 1,871 (20.0)                               |                      |
| Missing data                    | 24,745 (23.1)§                 | 5,165 (11.7)§                           |                      | 3,340 (13.9)§                     |                      | 111 (14.6)§                                |                      | 2,002 (9.7)§                            | 945 (9.2)§                                 |                      |
|                                 |                                |                                         |                      |                                   |                      |                                            |                      |                                         |                                            |                      |

| <b>Gestation weeks at earliest antenatal visit</b> |               |               |                  |               |                  |            |                  |               |              |                  |
|----------------------------------------------------|---------------|---------------|------------------|---------------|------------------|------------|------------------|---------------|--------------|------------------|
| 1 <sup>st</sup> Trimester                          | 69,896 (65.4) | 36,789 (83.7) | <b>&lt;0.001</b> | 19,075 (79.2) | <b>&lt;0.001</b> | 569 (75.0) | <b>&lt;0.001</b> | 18,155 (88.4) | 9,185 (89.4) | <b>0.036</b>     |
| 2 <sup>nd</sup> Trimester                          | 29,269 (27.4) | 5,791 (13.2)  |                  | 4,117 (17.1)  |                  | 166 (21.9) |                  | 1,770 (8.6)   | 829 (8.1)    |                  |
| 3 <sup>rd</sup> Trimester                          | 7,741 (7.2)   | 1,376 (3.1)   |                  | 890 (3.7)     |                  | 24 (3.2)   |                  | 605 (2.9)     | 264 (2.6)    |                  |
| Missing                                            | 237 (0.2)§    | 42 (0.1)§     |                  | 17 (0.1)§     |                  | 3 (0.4)§   |                  | 14 (0.1)§     | 13 (0.1)§    |                  |
| <b>Maternal smoking Status</b>                     |               |               |                  |               |                  |            |                  |               |              |                  |
| Unknown                                            | 6,505 (6.1)§  | 819 (1.9)§    | <b>&lt;0.001</b> | 500 (2.1)§    | <b>&lt;0.001</b> | 32 (4.2)§  | 0.132            | 448 (2.2)§    | 155 (1.5)§   | <b>&lt;0.001</b> |
| Ex-smoker                                          | 5,952 (5.6)   | 3,363 (7.6)   |                  | 1,923 (8.1)   |                  | 35 (4.8)   |                  | 1,427 (7.1)   | 660 (6.5)    |                  |
| Non-smoker                                         | 70,319 (69.9) | 31,421 (72.8) |                  | 15,755 (66.8) |                  | 534 (73.2) |                  | 15,525 (77.3) | 8,368 (82.6) |                  |
| Smoker                                             | 24,367 (24.2) | 8,395 (19.4)  |                  | 5,921 (25.1)  |                  | 161 (22.2) |                  | 3,144 (15.6)  | 1,108 (10.9) |                  |
| <b>Maternal SIMD Decile</b>                        |               |               |                  |               |                  |            |                  |               |              |                  |
| Least Deprived (7-10)                              | 65,227 (61.8) | 25,192 (57.9) | <b>&lt;0.001</b> | 12,807 (53.8) | <b>&lt;0.001</b> | 501 (66.3) | <b>0.012</b>     | 12,806 (62.9) | 6,714 (66.1) | <b>&lt;0.001</b> |
| Most Deprived (1-6)                                | 40,321 (38.2) | 18,289 (42.1) |                  | 11,017 (46.2) |                  | 255 (33.7) |                  | 7,564 (37.1)  | 3,442 (33.9) |                  |
| Missing                                            | 1,595 (1.5)§  | 517 (1.2)§    |                  | 275 (1.1)§    |                  | 6 (0.8)§   |                  | 174 (0.8)§    | 135 (1.3)§   |                  |
| <b>Maternal hypertensive disorders</b>             |               |               |                  |               |                  |            |                  |               |              |                  |
| None                                               | 91,276 (85.2) | 35,529 (80.8) | <b>&lt;0.001</b> | 18,635 (77.3) | <b>&lt;0.001</b> | 636 (83.5) | <b>0.001</b>     | 18,851 (91.8) | 9,273 (90.1) | <b>&lt;0.001</b> |
| Gestational Hypertension                           | 13,029 (12.2) | 5,501 (12.5)  |                  | 3,584 (14.9)  |                  | 88 (11.5)  |                  | 1,165 (5.7)   | 690 (6.7)    |                  |
| Preeclampsia                                       | 2,780 (2.6)   | 2,941 (6.7)   |                  | 1,861 (7.7)   |                  | 38 (5.0)   |                  | 523 (2.5)     | 324 (3.1)    |                  |
| Eclampsia                                          | 58 (0.1)      | 27 (0.1)      |                  | 19 (0.1)      |                  | 0 (0.0)    |                  | 5 (<0.1)      | 4 (<0.1)     |                  |
| <b>Maternal antepartum haemorrhage</b>             |               |               |                  |               |                  |            |                  |               |              |                  |
| No haemorrhage                                     | 97,527 (91.0) | 37,673 (85.6) | <b>&lt;0.001</b> | 20,306 (84.3) | <b>&lt;0.001</b> | 684 (89.8) | 0.434            | 18,549 (90.3) | 9,244 (89.8) | <b>&lt;0.001</b> |
| Abruption                                          | 697 (0.7)     | 468 (1.1)     |                  | 221 (0.9)     |                  | 8 (1.0)    |                  | 103 (0.5)     | 106 (1.0)    |                  |
| Placenta previa                                    | 308 (0.3)     | 368 (0.8)     |                  | 152 (0.6)     |                  | 2 (0.3)    |                  | 23 (0.1)      | 114 (1.1)    |                  |
| Unspecified                                        | 8,611 (8.0)   | 5,489 (12.5)  |                  | 3,420 (14.2)  |                  | 68 (8.9)   |                  | 1,869 (9.1)   | 827 (8.0)    |                  |
| <b>Type of labour</b>                              |               |               |                  |               |                  |            |                  |               |              |                  |
| Elective Caesarean Section                         | 5,967 (5.6)   | 6,925 (15.7)  | <b>&lt;0.001</b> | 1,384 (5.7)   | <b>&lt;0.001</b> | 67 (8.8)   | <b>&lt;0.001</b> | 616 (3.0)     | 3,843 (37.3) | <b>&lt;0.001</b> |
| Induced                                            | 24,120 (22.5) | 16,276 (37.0) |                  | 10,067 (41.8) |                  | 228 (29.9) |                  | 3,895 (19.0)  | 1,998 (19.4) |                  |
| Spontaneous                                        | 77,056 (71.9) | 20,797 (47.3) |                  | 12,648 (52.5) |                  | 467 (61.3) |                  | 16,033 (78.0) | 4,450 (43.2) |                  |

| <b>Type of delivery</b>              |                |               |                  |               |                  |            |                  |               |              |                  |
|--------------------------------------|----------------|---------------|------------------|---------------|------------------|------------|------------------|---------------|--------------|------------------|
| Spontaneous vaginal delivery (SVD)   | 75,027 (70.1)  | 19,287 (43.8) | <b>&lt;0.001</b> | 15,983 (66.3) | <b>&lt;0.001</b> | 496 (65.2) | <b>0.003</b>     | 16,398 (79.8) | 1,403 (13.6) | <b>&lt;0.001</b> |
| Instrumental                         | 15,409 (14.4)  | 8,107 (18.4)  |                  | 4,043 (16.8)  |                  | 120 (15.8) |                  | 2,546 (12.4)  | 1,927 (18.7) |                  |
| Caesarean Section                    | 15,566 (14.5)  | 16,351 (37.2) |                  | 3,879 (16.1)  |                  | 141 (18.5) |                  | 1,509 (7.3)   | 6,937 (67.4) |                  |
| Other                                | 1,096 (1.0)    | 247 (0.6)     |                  | 191 (0.8)     |                  | 4 (0.5)    |                  | 89 (0.4)      | 24 (0.2)     |                  |
| Missing                              | 45 (<0.1)§     | 6 (<0.1)§     |                  | 3 (<0.1)§     |                  | 1 (0.1)§   |                  | 2 (<0.1)§     | 0 (0.0)§     |                  |
| <b>Analgesia during labour</b>       |                |               |                  |               |                  |            |                  |               |              |                  |
| No                                   | 105,176 (98.2) | 36,117 (82.1) | <b>&lt;0.001</b> | 20,974 (87.0) | <b>&lt;0.001</b> | 729 (95.7) | <b>&lt;0.001</b> | 19,915 (96.9) | 8,235 (80.0) | <b>&lt;0.001</b> |
| Yes                                  | 1,967 (1.8)    | 7,881 (17.9)  |                  | 3,125 (13.0)  |                  | 33 (4.3)   |                  | 629 (3.1)     | 2,056 (20.0) |                  |
| <b>Baby presentation at delivery</b> |                |               |                  |               |                  |            |                  |               |              |                  |
| Occiput posterior                    | 11,571 (10.8)  | 8,152 (18.6)  | <b>&lt;0.001</b> | 2,636 (11.0)  | 0.525            | 68 (8.9)   | 0.093            | 1,401 (6.8)   | 2,967 (28.9) | <b>&lt;0.001</b> |
| Occiput anterior                     | 95,352 (89.2)  | 35,745 (81.4) |                  | 21,409 (89.0) |                  | 694 (91.1) |                  | 19,100 (93.2) | 7,306 (71.1) |                  |
| Missing                              | 220 (0.2)§     | 101 (0.2)§    |                  | 54 (0.2)§     |                  | 0 (0.0)§   |                  | 43 (0.2)§     | 18 (0.2)§    |                  |
| <b>Sex of baby</b>                   |                |               |                  |               |                  |            |                  |               |              |                  |
| Female                               | 52,265 (48.8)  | 21,139 (48.0) | <b>0.010</b>     | 11,739 (48.7) | 0.861            | 367 (48.2) | 0.732            | 10,124 (49.3) | 4,907 (47.7) | <b>0.008</b>     |
| Male                                 | 54,866 (51.2)  | 22,852 (51.9) |                  | 12,354 (51.3) |                  | 395 (51.8) |                  | 10,417 (50.7) | 5,384 (52.3) |                  |
| Missing                              | 12 (<0.1)§     | 7 (<0.1)§     |                  | 6 (<0.1)§     |                  | 0 (0.0)§   |                  | 3 (<0.1)§     | 0 (0.0)§     |                  |

643 n/a, not applicable; n, number of pregnancies

644 \*Only applicable to Diclofenac 2005-2015 analysis

645 †p value in comparison to the first ("No analgesic") column

646 ‡p value in comparison to "No analgesic 2005-2015" control column

647 §Percentage of missing data on total, not included in the analysis

648



**Table 2.** Regression analysis of offspring outcomes between control (no analgesic) and groups exposed to at least one analgesic, only paracetamol, and at least one from ibuprofen, aspirin, naproxen. 35

| Outcomes                                    | No analgesic<br>(n=107,143)<br>n (%) | At least one<br>analgesic<br>(n=43,998)<br>n (%) | Crude<br>OR (CI 95%)    | Adjusted<br>OR (95% CI)                | Paracetamol<br>only<br>(n=24,099)<br>n (%) | Crude<br>OR (95% CI)          | Adjusted<br>OR (95% CI)                  | Ibu/Asp/Na<br>pr<br>(n=762)<br>n (%) | Crude<br>OR (95% CI)        | Adjusted<br>OR (95% CI)                 |
|---------------------------------------------|--------------------------------------|--------------------------------------------------|-------------------------|----------------------------------------|--------------------------------------------|-------------------------------|------------------------------------------|--------------------------------------|-----------------------------|-----------------------------------------|
| <b>Gestation at delivery (weeks)</b>        |                                      |                                                  |                         |                                        |                                            |                               |                                          |                                      |                             |                                         |
| >=37                                        | 100,879 (94.2)                       | 39,838 (90.5)                                    | 1.00                    | 1.00                                   | 21,589 (89.6)                              | 1.00                          | 1.00                                     | 697 (91.5)                           | 1.00                        | 1.00                                    |
| <37                                         | 6,264 (5.8)                          | 4,160 (9.5)                                      | <b>1.68 (1.61-1.75)</b> | <b>1.50 (1.43-1.58)<sup>a</sup></b>    | 2,510 (10.4)                               | <b>1.87 (1.78-1.97)</b>       | <b>1.56 (1.48-1.65)<sup>a</sup></b>      | 65 (8.5)                             | <b>1.50 (1.16-1.94)</b>     | <b>1.42 (1.08-1.86)<sup>a</sup></b>     |
| <b>Pregnancy outcome</b>                    |                                      |                                                  |                         |                                        |                                            |                               |                                          |                                      |                             |                                         |
| Livebirth                                   | 105,949 (98.9)                       | 43,407 (98.7)                                    | 1.00                    | 1.00                                   | 23,704 (98.4)                              | 1.00                          | 1.00                                     | 747 (98.0)                           | 1.00                        | 1.00                                    |
| Stillbirth                                  | 803 (0.7)                            | 405 (0.9)                                        | <b>1.23 (1.09-1.39)</b> | <b>1.33 (1.15-1.54)<sup>a</sup></b>    | 275 (1.1)                                  | <b>1.53 (1.33-1.76)</b>       | <b>1.52 (1.30-1.77)<sup>a</sup></b>      | 13 (1.7)                             | <b>2.30 (1.32-3.99)</b>     | <b>2.34 (1.29-4.25)<sup>a</sup></b>     |
| Neonatal<br>Death                           | 373 (0.3)                            | 182 (0.4)                                        | 1.19 (0.99-1.42)        | <b>1.56 (1.27-1.93)<sup>a</sup></b>    | 117 (0.5)                                  | <b>1.40 (1.14-1.73)</b>       | <b>1.56 (1.24-1.96)<sup>a</sup></b>      | 2 (0.3)                              | 0.76 (0.19-3.06)            | 0.93 (0.23-3.74) <sup>a</sup>           |
| Missing                                     | 18 (<0.1)                            | 4 (<0.1)                                         | n/a                     | n/a                                    | 3 (<0.1)                                   | n/a                           | n/a                                      | 0 (0.0)                              | n/a                         | n/a                                     |
| <b>Weight of baby (grams)</b>               |                                      |                                                  |                         |                                        |                                            |                               |                                          |                                      |                             |                                         |
| NBW                                         | 87,966 (82.1)                        | 34,555 (78.6)                                    | 1.00                    | 1.00                                   | 19,163 (79.5)                              | 1.00                          | 1.00                                     | 605 (79.5)                           | 1.00                        | 1.00                                    |
| LBW                                         | 5,910 (5.5)                          | 3,571 (8.1)                                      | <b>1.54 (1.47-1.61)</b> | <b>1.28 (1.20-1.37)<sup>b</sup></b>    | 2,213 (9.2)                                | <b>1.72 (1.63-1.81)</b>       | <b>1.60 (1.51-1.69)<sup>b</sup></b>      | 59 (7.7)                             | <b>1.45 (1.11-1.90)</b>     | 1.29 (0.91-1.83) <sup>b</sup>           |
| HBW                                         | 13,233 (12.4)                        | 5,863 (13.3)                                     | <b>1.13 (1.09-1.17)</b> | <b>1.09 (1.05-1.13)<sup>b</sup></b>    | 2,720 (11.3)                               | <b>0.94 (0.90-0.99)</b>       | 0.98 (0.93-1.02) <sup>b</sup>            | 97 (12.7)                            | 1.07 (0.86-1.32)            | 0.99 (0.80-1.24) <sup>b</sup>           |
| Missing                                     | 34 (<0.1)                            | 9 (<0.1)                                         | n/a                     | n/a                                    | 3 (<0.1)                                   | n/a                           | n/a                                      | 1 (0.1)                              | n/a                         | n/a                                     |
| <b>Standardised Birthweight Score</b>       |                                      |                                                  |                         |                                        |                                            |                               |                                          |                                      |                             |                                         |
| Mean (SD)                                   | 0.001 (0.003)                        | -0.002 (0.065)                                   | <b>0.03 (0.02-0.04)</b> | <b>0.046 (0.032-0.059)<sup>c</sup></b> | 0.001 (0.991)                              | <b>-0.04 (-0.058- -0.029)</b> | <b>-0.014 (-0.029-0.001)<sup>c</sup></b> | 0.046 (0.038)                        | <b>0.045 (-0.029-0.119)</b> | <b>0.049 (-0.025-0.123)<sup>c</sup></b> |
| <b>Admitted to neonatal unit</b>            |                                      |                                                  |                         |                                        |                                            |                               |                                          |                                      |                             |                                         |
| No                                          | 62,378 (58.2)                        | 32,391 (73.6)                                    | 1.00                    | 1.00                                   | 16,342 (67.8)                              | 1.00                          | 1.00                                     | 480 (63.0)                           | 1.00                        | 1.00                                    |
| Yes                                         | 11,011 (10.3)                        | 7,448 (16.9)                                     | <b>1.30 (1.26-1.35)</b> | <b>1.57 (1.51-1.64)<sup>b</sup></b>    | 3,956 (16.4)                               | <b>1.37 (1.32-1.43)</b>       | <b>1.45 (1.38-1.53)<sup>b</sup></b>      | 117 (15.4)                           | <b>1.38 (1.13-1.69)</b>     | <b>1.54 (1.22-1.94)<sup>b</sup></b>     |
| Missing                                     | 33,754 (31.5)                        | 4,159 (9.5)                                      | n/a                     | n/a                                    | 3,801 (15.8)                               | n/a                           | n/a                                      | 762 (21.7)                           | n/a                         | n/a                                     |
| <b>APGAR score at 1 min</b>                 |                                      |                                                  |                         |                                        |                                            |                               |                                          |                                      |                             |                                         |
| Normal                                      | 92,217 (86.1)                        | 38,224 (86.9)                                    | 1.00                    | 1.00                                   | 20,593 (85.5)                              | 1.00                          | 1.00                                     | 659 (86.5)                           | 1.00                        | 1.00                                    |
| <7                                          | 14,335 (13.4)                        | 5,674 (12.9)                                     | <b>0.96 (0.92-0.99)</b> | <b>1.18 (1.13-1.23)<sup>d</sup></b>    | 3,437(14.3)                                | <b>1.07 (1.03-1.12)</b>       | <b>1.23 (1.18-1.28)<sup>d</sup></b>      | 101 (13.3)                           | 0.99 (0.80-1.22)            | 1.07 (0.86-1.32) <sup>d</sup>           |
| Missing                                     | 591 (0.6)                            | 100 (0.2)                                        | n/a                     | n/a                                    | 69 (0.3)                                   | n/a                           | n/a                                      | 2 (0.3)                              | n/a                         | n/a                                     |
| <b>APGAR score at 5 min</b>                 |                                      |                                                  |                         |                                        |                                            |                               |                                          |                                      |                             |                                         |
| Normal                                      | 104,292 (97.3)                       | 42,730 (97.1)                                    | 1.00                    | 1.00                                   | 23,334 (96.8)                              | 1.00                          | 1.00                                     | 738 (96.9)                           | 1.00                        | 1.00                                    |
| <7                                          | 2,216 (2.1)                          | 1,163 (2.6)                                      | <b>1.28 (1.19-1.38)</b> | <b>1.48 (1.35-1.62)<sup>d</sup></b>    | 690 (2.9)                                  | <b>1.39 (1.28-1.52)</b>       | <b>1.53 (1.40-1.68)<sup>d</sup></b>      | 21 (2.8)                             | 1.34 (0.87-2.07)            | 1.52 (0.97-2.36) <sup>d</sup>           |
| Missing                                     | 635 (0.6)                            | 105 (0.2)                                        | n/a                     | n/a                                    | 75 (0.3)                                   | n/a                           | n/a                                      | 3 (0.4)                              | n/a                         | n/a                                     |
| <b>Cryptorchidism (only males included)</b> |                                      |                                                  |                         |                                        |                                            |                               |                                          |                                      |                             |                                         |
| No                                          | 54,509 (99.3)                        | 22,616 (99.0)                                    | 1.00                    | 1.00                                   | 12,247 (99.1)                              | 1.00                          | 1.00                                     | 394 (99.4)                           | 1.00                        | 1.00                                    |
| Yes                                         | 357 (0.7)                            | 236 (1.0)                                        | <b>1.59 (1.35-1.88)</b> | 0.92 (0.77-1.11) <sup>b</sup>          | 107 (0.9)                                  | <b>1.33 (1.07-1.66)</b>       | 0.87 (0.69-1.09) <sup>b</sup>            | 1 (0.3)                              | 0.39 (0.05-2.77)            | 0.28 (0.04-1.98) <sup>b</sup>           |
| <b>Neural Tube Defects</b>                  |                                      |                                                  |                         |                                        |                                            |                               |                                          |                                      |                             |                                         |

1  
2  
3  
4  
5  
6  
7  
8  
9  
10  
11  
12  
13  
14  
15  
16  
17  
18  
19  
20  
21  
22  
23  
24  
25  
26  
27  
28  
29  
30  
31  
32  
33  
34  
35  
36  
37  
38  
39  
40  
41  
42  
43  
44  
45  
46

|                                          |                 |                |                         |                                     |                |                         |                               |             |                         |                               |
|------------------------------------------|-----------------|----------------|-------------------------|-------------------------------------|----------------|-------------------------|-------------------------------|-------------|-------------------------|-------------------------------|
| No                                       | 107,093 (99.9)  | 43,928 (99.8)  | 1.00                    | 1.00                                | 24,077 (99.9)  | 1.00                    | 1.00                          | 762 (100)   | 1.00                    | 1.00                          |
| Yes                                      | 50 (0.1)        | 70 (0.2)       | <b>3.41 (2.37-4.91)</b> | <b>1.64 (1.08-2.47)<sup>b</sup></b> | 22 (0.1)       | <b>1.96 (1.19-3.23)</b> | 1.21 (0.71-2.06) <sup>b</sup> | 0 (0.0)     | n/a                     | n/a                           |
| <b>Amniotic Band Defects</b>             |                 |                |                         |                                     |                |                         |                               |             |                         |                               |
| No                                       | 107,053 (99.9)  | 43,936 (99.9)  | 1.00                    | 1.00                                | 24,070 (99.9)  | 1.00                    | 1.00                          | 760 (99.7)  | 1.00                    | 1.00                          |
| Yes                                      | 90 (0.1)        | 62 (0.1)       | <b>1.68 (1.21-2.32)</b> | 1.02 (0.71-1.47) <sup>b</sup>       | 29 (0.1)       | 1.43 (0.94-2.18)        | 0.98 (0.63-1.52) <sup>b</sup> | 2 (0.3)     | 3.13 (0.77-12.73)       | 2.29 (0.56-9.37) <sup>b</sup> |
| <b>Hypospadias (only males included)</b> |                 |                |                         |                                     |                |                         |                               |             |                         |                               |
| No                                       | 54,607 (99.5)   | 22,600 (98.9)  | 1.00                    | 1.00                                | 12,258 (99.2)  | 1.00                    | 1.00                          | 390 (98.7)  | 1.00                    | 1.00                          |
| Yes                                      | 259 (0.3)       | 252 (1.1)      | <b>2.35 (1.98-2.80)</b> | <b>1.27 (1.05-1.54)<sup>b</sup></b> | 96 (0.8)       | <b>1.65 (1.31-2.09)</b> | 1.07 (0.84-1.37) <sup>b</sup> | 5 (1.3)     | <b>2.70 (1.11-6.59)</b> | 1.91 (0.78-4.68) <sup>b</sup> |
| <b>Gastroschisis</b>                     |                 |                |                         |                                     |                |                         |                               |             |                         |                               |
| No                                       | 107,120 (99.9)  | 43,979 (99.9)  | 1.00                    | 1.00                                | 24,089 (99.9)  | 1.00                    | 1.00                          | 762(100)    | 1.00                    | 1.00                          |
| Yes                                      | 23 (0.1)        | 19 (0.1)       | <b>2.01 (1.10-3.70)</b> | 1.10 (0.56-2.20) <sup>b</sup>       | 10 (0.1)       | 1.93 (0.92-4.06)        | 0.99 (0.45-2.21) <sup>b</sup> | 0 (0.0)     | n/a                     | n/a                           |
| <b>At least one outcome*</b>             |                 |                |                         |                                     |                |                         |                               |             |                         |                               |
| No                                       | 106,367 (99.3%) | 43,363 (98.6%) | 1.00                    | 1.00                                | 23,835 (98.9%) | 1.00                    | 1.00                          | 754 (99.0%) | 1.00                    | 1.00                          |
| Yes                                      | 776 (0.7%)      | 635 (1.4%)     | <b>2.01 (1.81-2.23)</b> | 1.12 (0.99-1.26) <sup>b</sup>       | 264 (1.1%)     | <b>1.52 (1.32-1.75)</b> | 0.97 (0.84-1.13) <sup>b</sup> | 8 (1.0%)    | 1.45 (0.72-2.93)        | 1.11 (0.55-2.23) <sup>b</sup> |

n/a, not applicable; n, number of pregnancies

<sup>a</sup> Adjusted for year of delivery, maternal age at delivery, SIMD, first gestational booking, maternal hypertensive disorders, maternal antepartum haemorrhage

<sup>b</sup> Adjusted for year of delivery, maternal age at delivery, SIMD, first gestational booking, gestation at delivery

<sup>c</sup> Adjusted for year of delivery, maternal age at delivery, SIMD, first gestational booking

<sup>d</sup> Adjusted for year of delivery, maternal age at delivery, SIMD, first gestational booking, type of delivery

\*Including cryptorchidism, neural tube defects, amniotic band defects, hypospadias, gastroschisis

**Table 3.** Sub-group regression analysis between control pregnancies and exposed to diclofenac.

| Outcomes                                    | No analgesic<br>(n=20,544)<br>n (%) | Diclofenac only<br>2005-2015<br>(n=10,291)<br>n (%) | Crude<br>OR (CI 95%)        | Adjusted<br>OR (CI 95%)                 |
|---------------------------------------------|-------------------------------------|-----------------------------------------------------|-----------------------------|-----------------------------------------|
| <b>Gestation at delivery (weeks)</b>        |                                     |                                                     |                             |                                         |
| ≥37                                         | 19,407 (94.5%)                      | 9,640 (93.7%)                                       | 1.00                        | 1.00                                    |
| <37                                         | 1,137 (5.5%)                        | 651 (6.3%)                                          | <b>1.15 (1.04, 1.27)</b>    | 1.10 (0.99, 1.22) <sup>a</sup>          |
| <b>Pregnancy outcome</b>                    |                                     |                                                     |                             |                                         |
| Livebirth                                   | 20,393 (99.3%)                      | 10,227 (99.4%)                                      | 1.00                        | 1.00                                    |
| Stillbirth                                  | 116 (0.5%)                          | 39 (0.4%)                                           | <b>0.67 (0.47, 0.96)</b>    | <b>0.59 (0.41, 0.87)<sup>a</sup></b>    |
| Neonatal<br>Death                           | 35 (0.2%)                           | 25 (0.2%)                                           | 1.42 (0.85, 2.38)           | 1.26 (0.73, 2.15) <sup>a</sup>          |
| <b>Weight of baby (grams)</b>               |                                     |                                                     |                             |                                         |
| NBW                                         | 16,869 (82.1%)                      | 8,116 (78.9%)                                       | 1.00                        | 1.00                                    |
| LBW                                         | 965 (4.7%)                          | 572 (5.6%)                                          | <b>1.23 (1.11, 1.37)</b>    | <b>1.22 (1.07, 1.40)<sup>b</sup></b>    |
| HBW                                         | 2,707 (13.2%)                       | 1,600 (15.5%)                                       | <b>1.23 (1.15, 1.31)</b>    | <b>1.21 (1.13, 1.29)<sup>b</sup></b>    |
| Missing                                     | 3 (0.0%)                            | 3 (0.0%)                                            |                             |                                         |
| <b>Standardised Birthweight Score</b>       |                                     |                                                     |                             |                                         |
|                                             | -0.039 (0.959)                      | 0.132 (1.036)                                       | <b>0.171 (0.145, 0.197)</b> | <b>0.167 (0.141, 0.193)<sup>c</sup></b> |
| <b>Admitted to neonatal unit</b>            |                                     |                                                     |                             |                                         |
| No                                          | 18,224 (88.7%)                      | 8,747 (85.0%)                                       | 1.00                        | 1.00                                    |
| Yes                                         | 2,175 (10.6%)                       | 1,492 (14.5%)                                       | <b>1.43 (1.33, 1.53)</b>    | <b>1.46 (1.35, 1.58)<sup>b</sup></b>    |
| Missing                                     | 145 (0.7%)                          | 52 (0.5%)                                           |                             |                                         |
| <b>APGAR score at 1 min</b>                 |                                     |                                                     |                             |                                         |
| Normal                                      | 18,709 (91.1%)                      | 9,350 (90.9%)                                       | 1.00                        | 1.00                                    |
| <7                                          | 1,658 (8.1%)                        | 924 (9.0%)                                          | <b>1.12 (1.03, 1.21)</b>    | 0.93 (0.83, 1.04) <sup>d</sup>          |
| Missing                                     | 177 (0.9%)                          | 17 (0.2%)                                           |                             |                                         |
| <b>APGAR score at 5 min</b>                 |                                     |                                                     |                             |                                         |
| Normal                                      | 20,065 (97.7%)                      | 10,096 (98.1%)                                      | 1.00                        | 1.00                                    |
| <7                                          | 302 (1.5%)                          | 177 (1.7%)                                          | 0.86 (0.71, 1.04)           | 0.94 (0.72, 1.23) <sup>d</sup>          |
| Missing                                     | 177 (0.9%)                          | 18 (0.2%)                                           |                             |                                         |
| <b>Cryptorchidism (only males included)</b> |                                     |                                                     |                             |                                         |
| No                                          | 10,284 (98.7%)                      | 5,314 (98.7%)                                       | 1.00                        | 1.00                                    |
| Yes                                         | 133 (1.3%)                          | 70 (1.3%)                                           | 1.02 (0.76, 1.36)           | 1.05 (0.78, 1.42) <sup>b</sup>          |
| <b>Neural Tube Defects</b>                  |                                     |                                                     |                             |                                         |
| No                                          | 20,527 (99.9%)                      | 10,263 (99.7%)                                      | 1.00                        | 1.00                                    |
| Yes                                         | 17 (0.1%)                           | 28 (0.3%)                                           | <b>3.29 (1.80, 6.02)</b>    | <b>3.62 (1.95, 6.74)<sup>b</sup></b>    |
| <b>Amniotic Band Defects</b>                |                                     |                                                     |                             |                                         |
| No                                          | 20,514 (99.9%)                      | 10,277 (99.9%)                                      | 1.00                        | 1.00                                    |
| Yes                                         | 30 (0.1%)                           | 14 (0.1%)                                           | 0.93 (0.49, 1.76)           | 0.81 (0.41, 1.58) <sup>b</sup>          |
| <b>Hypospadias (only males included)</b>    |                                     |                                                     |                             |                                         |
| No                                          | 10,317 (99.0%)                      | 5,308 (98.6%)                                       | 1.00                        | 1.00                                    |
| Yes                                         | 100 (1.0%)                          | 76 (1.4%)                                           | <b>1.48 (1.09, 1.99)</b>    | <b>1.49 (1.09, 2.03)<sup>b</sup></b>    |
| <b>Gastroschisis</b>                        |                                     |                                                     |                             |                                         |
| No                                          | 20,538 (99.9%)                      | 10,284 (99.9%)                                      | 1.00                        | 1.00                                    |
| Yes                                         | 6 (0.1%)                            | 7 (0.1%)                                            | 2.33 (0.78, 6.94)           | 2.93 (0.97, 8.88) <sup>b</sup>          |
| <b>At least one outcome*</b>                |                                     |                                                     |                             |                                         |
| No                                          | 20,258 (98.6%)                      | 10,097 (98.1%)                                      | 1.00                        | 1.00                                    |
| Yes                                         | 286 (1.4%)                          | 194 (1.9%)                                          | <b>1.36 (1.13, 1.64)</b>    | <b>1.38 (1.15, 1.67)<sup>b</sup></b>    |

- 1  
2  
3 651 <sup>a</sup> Adjusted for year of delivery, maternal age at delivery, SIMD, first gestational booking, maternal  
4 652 hypertensive disorders, maternal antepartum haemorrhage  
5  
6 653 <sup>b</sup> Adjusted for year of delivery, maternal age at delivery, SIMD, first gestational booking, gestation at  
7 654 delivery  
8  
9 655 <sup>c</sup> Adjusted for year of delivery, maternal age at delivery, SIMD, first gestational booking  
10 656 <sup>d</sup> Adjusted for year of delivery, maternal age at delivery, SIMD, first gestational booking, type of  
11 657 delivery  
12 658 \*Including cryptorchidism, neural tube defects, amniotic band defects, hypospadias, gastroschisis  
13  
14  
15  
16  
17  
18  
19  
20  
21  
22  
23  
24  
25  
26  
27  
28  
29  
30  
31  
32  
33  
34  
35  
36  
37  
38  
39  
40  
41  
42  
43  
44  
45  
46  
47  
48  
49  
50  
51  
52  
53  
54  
55  
56  
57  
58  
59  
60

For peer review only

1  
2  
3 659 **Figure 1.** Flowchart of cohort selection and sub-group analyses. n=number of  
4  
5 660 pregnancies in each analysis. \*98.3% of pregnancies using only diclofenac occurred  
6  
7 661 during 2005-2015, therefore analysis was performed only on data from that decade  
8  
9 662 to rule out any temporal effect.  
10  
11  
12  
13  
14  
15  
16  
17  
18  
19  
20  
21  
22  
23  
24  
25  
26  
27  
28  
29  
30  
31  
32  
33  
34  
35  
36  
37  
38  
39  
40  
41  
42  
43  
44  
45  
46  
47  
48  
49  
50  
51  
52  
53  
54  
55  
56  
57  
58  
59  
60

For peer review only

1  
2  
3 664 **Figure 2.** Prevalence of use during pregnancy for each analgesic sub-group over our  
4  
5 665 30-year study period. **(A)** Merge graph showing percentage of pregnancies using  
6  
7 666 each analgesic group during pregnancy. **(B)** Percentage of use for at least one  
8  
9 667 analgesic out of ibuprofen, aspirin, naproxen. \*In 2005 there was a change in  
10  
11 668 legislation making diclofenac available without prescription.  
12  
13  
14

15 669  
16  
17  
18  
19  
20  
21  
22  
23  
24  
25  
26  
27  
28  
29  
30  
31  
32  
33  
34  
35  
36  
37  
38  
39  
40  
41  
42  
43  
44  
45  
46  
47  
48  
49  
50  
51  
52  
53  
54  
55  
56  
57  
58  
59  
60

For peer review only

1  
2  
3 670 **Figure S1.** Directed acyclic graph (DAG) of analgesics use to amniotic band defects

4  
5 671 outcome path and relevant measured and unmeasured biasing factors in our

6  
7 672 analysis.

8  
9  
10 673

11  
12  
13  
14  
15  
16  
17  
18  
19  
20  
21  
22  
23  
24  
25  
26  
27  
28  
29  
30  
31  
32  
33  
34  
35  
36  
37  
38  
39  
40  
41  
42  
43  
44  
45  
46  
47  
48  
49  
50  
51  
52  
53  
54  
55  
56  
57  
58  
59  
60

For peer review only

1  
2  
3 674 **Figure S2.** Directed acyclic graph (DAG) of analgesics use to APGAR score  
4  
5 675 outcome path and relevant measured and unmeasured biasing factors in our  
6  
7 676 analysis.  
8  
9  
10 677  
11  
12  
13  
14  
15  
16  
17  
18  
19  
20  
21  
22  
23  
24  
25  
26  
27  
28  
29  
30  
31  
32  
33  
34  
35  
36  
37  
38  
39  
40  
41  
42  
43  
44  
45  
46  
47  
48  
49  
50  
51  
52  
53  
54  
55  
56  
57  
58  
59  
60

For peer review only



1  
2  
3 678 **Figure S3.** Directed acyclic graph (DAG) of analgesics use to cryptorchidism

4  
5 679 outcome path and relevant measured and unmeasured biasing factors in our

6  
7  
8 680 analysis.

9  
10 681

11  
12  
13  
14  
15  
16  
17  
18  
19  
20  
21  
22  
23  
24  
25  
26  
27  
28  
29  
30  
31  
32  
33  
34  
35  
36  
37  
38  
39  
40  
41  
42  
43  
44  
45  
46  
47  
48  
49  
50  
51  
52  
53  
54  
55  
56  
57  
58  
59  
60

For peer review only

1  
2  
3  
4  
5  
6  
7  
8  
9  
10  
11  
12  
13  
14  
15  
16  
17  
18  
19  
20  
21  
22  
23  
24  
25  
26  
27  
28  
29  
30  
31  
32  
33  
34  
35  
36  
37  
38  
39  
40  
41  
42  
43  
44  
45  
46  
47  
48  
49  
50  
51  
52  
53  
54  
55  
56  
57  
58  
59  
60

682 **Figure S4.** Directed acyclic graph (DAG) of analgesics use to gastroschisis outcome  
683 path and relevant measured and unmeasured biasing factors in our analysis.

684

For peer review only

1  
2  
3 685 **Figure S5.** Directed acyclic graph (DAG) of analgesics use to gestation at delivery

4  
5 686 outcome path and relevant measured and unmeasured biasing factors in our

6  
7 687 analysis.

8  
9  
10 688

11  
12  
13  
14  
15  
16  
17  
18  
19  
20  
21  
22  
23  
24  
25  
26  
27  
28  
29  
30  
31  
32  
33  
34  
35  
36  
37  
38  
39  
40  
41  
42  
43  
44  
45  
46  
47  
48  
49  
50  
51  
52  
53  
54  
55  
56  
57  
58  
59  
60

For peer review only

1  
2  
3  
4  
5  
6  
7  
8  
9  
10  
11  
12  
13  
14  
15  
16  
17  
18  
19  
20  
21  
22  
23  
24  
25  
26  
27  
28  
29  
30  
31  
32  
33  
34  
35  
36  
37  
38  
39  
40  
41  
42  
43  
44  
45  
46  
47  
48  
49  
50  
51  
52  
53  
54  
55  
56  
57  
58  
59  
60

689 **Figure S6.** Directed acyclic graph (DAG) of analgesics use to hypospadias outcome  
690 path and relevant measured and unmeasured biasing factors in our analysis.

691

For peer review only

1  
2  
3 692 **Figure S7.** Directed acyclic graph (DAG) of analgesics use to admission to neonatal  
4  
5 693 unit outcome path and relevant measured and unmeasured biasing factors in our  
6  
7 694 analysis.  
8  
9

10 695  
11  
12  
13  
14  
15  
16  
17  
18  
19  
20  
21  
22  
23  
24  
25  
26  
27  
28  
29  
30  
31  
32  
33  
34  
35  
36  
37  
38  
39  
40  
41  
42  
43  
44  
45  
46  
47  
48  
49  
50  
51  
52  
53  
54  
55  
56  
57  
58  
59  
60

For peer review only

1  
2  
3  
4  
5  
6  
7  
8  
9  
10  
11  
12  
13  
14  
15  
16  
17  
18  
19  
20  
21  
22  
23  
24  
25  
26  
27  
28  
29  
30  
31  
32  
33  
34  
35  
36  
37  
38  
39  
40  
41  
42  
43  
44  
45  
46  
47  
48  
49  
50  
51  
52  
53  
54  
55  
56  
57  
58  
59  
60

696 **Figure S8.** Directed acyclic graph (DAG) of analgesics use to neural tube defects  
697 outcome path and relevant measured and unmeasured biasing factors in our  
698 analysis.

699

For peer review only

1  
2  
3 700 **Figure S9.** Directed acyclic graph (DAG) of analgesics use to pregnancy outcome  
4  
5 701 path and relevant measured and unmeasured biasing factors in our analysis.  
6  
7  
8 702  
9  
10  
11  
12  
13  
14  
15  
16  
17  
18  
19  
20  
21  
22  
23  
24  
25  
26  
27  
28  
29  
30  
31  
32  
33  
34  
35  
36  
37  
38  
39  
40  
41  
42  
43  
44  
45  
46  
47  
48  
49  
50  
51  
52  
53  
54  
55  
56  
57  
58  
59  
60

For peer review only

1  
2  
3  
4  
5  
6  
7  
8  
9  
10  
11  
12  
13  
14  
15  
16  
17  
18  
19  
20  
21  
22  
23  
24  
25  
26  
27  
28  
29  
30  
31  
32  
33  
34  
35  
36  
37  
38  
39  
40  
41  
42  
43  
44  
45  
46  
47  
48  
49  
50  
51  
52  
53  
54  
55  
56  
57  
58  
59  
60

703 **Figure S10.** Directed acyclic graph (DAG) of analgesics use to standardised  
704 birthweight score outcome path and relevant measured and unmeasured biasing  
705 factors in our analysis.  
706

For peer review only



1  
2  
3 707 **Figure S11.** Directed acyclic graph (DAG) of analgesics use to weight of baby  
4  
5 708 outcome path and relevant measured and unmeasured biasing factors in our  
6  
7 709 analysis.  
8  
9

10 710

11  
12 711  
13  
14  
15  
16  
17  
18  
19  
20  
21  
22  
23  
24  
25  
26  
27  
28  
29  
30  
31  
32  
33  
34  
35  
36  
37  
38  
39  
40  
41  
42  
43  
44  
45  
46  
47  
48  
49  
50  
51  
52  
53  
54  
55  
56  
57  
58  
59  
60

For peer review only

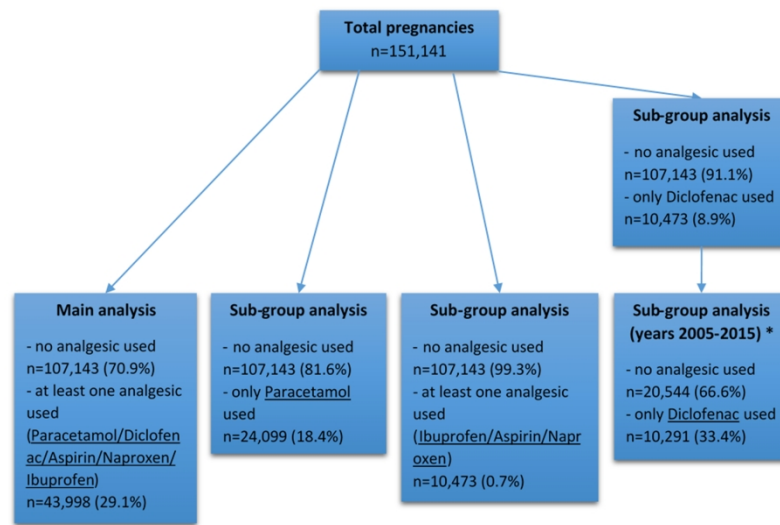

Figure 1. Flowchart of cohort selection and sub-group analyses. n=number of pregnancies in each analysis. \*98.3% of pregnancies using only diclofenac occurred during 2005-2015, therefore analysis was performed only on data from that decade to rule out any temporal effect.

338x190mm (300 x 300 DPI)

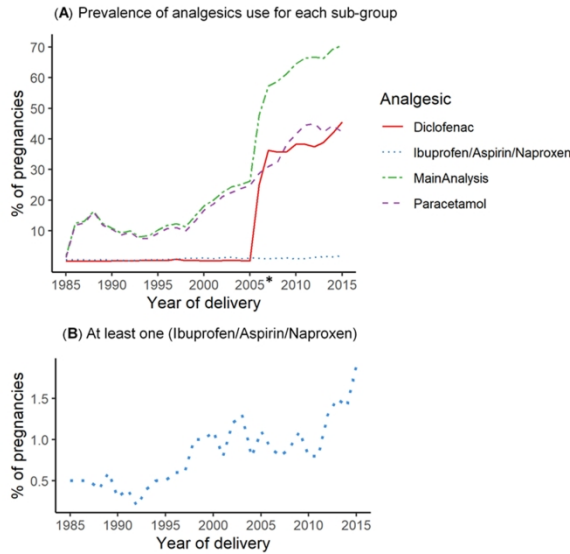

Figure 2. Prevalence of use during pregnancy for each analgesic sub-group over our 30-year study period. (A) Merge graph showing percentage of pregnancies using each analgesic group during pregnancy. (B) Percentage of use for at least one analgesic out of ibuprofen, aspirin, naproxen. \*In 2005 there was a change in legislation making diclofenac available without prescription.

338x190mm (300 x 300 DPI)

**Table S1.** Numbers needed to harm (NNH) calculations

| Outcomes                                    | No analgesic<br>(n=107,143)<br>n (%) | At least one<br>analgesic<br>(n=43,998)<br>n (%) | NNH  | Paracetamol<br>(n=24,099)<br>n (%) | NNH | Ibu/Asp/Napr<br>(n=762)<br>n (%) | NNH |
|---------------------------------------------|--------------------------------------|--------------------------------------------------|------|------------------------------------|-----|----------------------------------|-----|
| <b>Gestation at delivery (weeks)</b>        |                                      |                                                  |      |                                    |     |                                  |     |
| >=37                                        | 100,879 (94.2)                       | 39,838 (90.5)                                    |      | 21,589 (89.6)                      |     | 697 (91.5)                       |     |
| <37                                         | 6,264 (5.8)                          | 4,160 (9.5)                                      | 27   | 2,510 (10.4)                       | 22  | 65 (8.5)                         | 37  |
| <b>Pregnancy outcome</b>                    |                                      |                                                  |      |                                    |     |                                  |     |
| Livebirth                                   | 105,949 (98.9)                       | 43,407 (98.7)                                    |      | 23,704 (98.4)                      |     | 747 (98.0)                       |     |
| Stillbirth                                  | 803 (0.7)                            | 405 (0.9)                                        | 500  | 275 (1.1)                          | 250 | 13 (1.7)                         | 100 |
| Neonatal<br>Death                           | 373 (0.3)                            | 182 (0.4)                                        | 1000 | 117 (0.5)                          | 500 | 2 (0.3)                          | n/a |
| Missing                                     | 18 (<0.1)                            | 4 (<0.1)                                         | n/a  | 3 (<0.1)                           | n/a | 0 (0.0)                          | n/a |
| <b>Weight of baby (grams)</b>               |                                      |                                                  |      |                                    |     |                                  |     |
| NBW                                         | 87,966 (82.1)                        | 34,555 (78.6)                                    |      | 19,163 (79.5)                      |     | 605 (79.5)                       |     |
| LBW                                         | 5,910 (5.5)                          | 3,571 (8.1)                                      | 38   | 2,213 (9.2)                        | 39  | 59 (7.7)                         | 46  |
| HBW                                         | 13,233 (12.4)                        | 5,863 (13.3)                                     | 111  | 2,720 (11.3)                       | n/a | 97 (12.7)                        | 333 |
| Missing                                     | 34 (<0.1)                            | 9 (<0.1)                                         | n/a  | 3 (<0.1)                           | n/a | 1 (0.1)                          | n/a |
| <b>Admitted to neonatal unit</b>            |                                      |                                                  |      |                                    |     |                                  |     |
| No                                          | 62,378 (58.2)                        | 32,391 (73.6)                                    |      | 16,342 (67.8)                      |     | 480 (63.0)                       |     |
| Yes                                         | 11,011 (10.3)                        | 7,448 (16.9)                                     | 15   | 3,956 (16.4)                       | 16  | 117 (15.4)                       | 20  |
| Missing                                     | 33,754 (31.5)                        | 4,159 (9.5)                                      | n/a  | 3,801 (15.8)                       | n/a | 762 (21.7)                       | n/a |
| <b>APGAR score at 1 min</b>                 |                                      |                                                  |      |                                    |     |                                  |     |
| Normal                                      | 92,217 (86.1)                        | 38,224 (86.9)                                    |      | 20,593 (85.5)                      |     | 659 (86.5)                       |     |
| <7                                          | 14,335 (13.4)                        | 5,674 (12.9)                                     | n/a  | 3,437(14.3)                        | 111 | 101 (13.3)                       | n/a |
| Missing                                     | 591 (0.6)                            | 100 (0.2)                                        |      | 69 (0.3)                           | n/a | 2 (0.3)                          | n/a |
| <b>APGAR score at 5 min</b>                 |                                      |                                                  |      |                                    |     |                                  |     |
| Normal                                      | 104,292 (97.3)                       | 42,730 (97.1)                                    |      | 23,334 (96.8)                      |     | 738 (96.9)                       |     |
| <7                                          | 2,216 (2.1)                          | 1,163 (2.6)                                      | 200  | 690 (2.9)                          | 125 | 21 (2.8)                         | 143 |
| Missing                                     | 635 (0.6)                            | 105 (0.2)                                        | n/a  | 75 (0.3)                           | n/a | 3 (0.4)                          | n/a |
| <b>Cryptorchidism (only males included)</b> |                                      |                                                  |      |                                    |     |                                  |     |
| No                                          | 54,509 (99.3)                        | 22,616 (99.0)                                    |      | 12,247 (99.1)                      |     | 394 (99.4)                       |     |
| Yes                                         | 357 (0.7)                            | 236 (1.0)                                        | 333  | 107 (0.9)                          | 500 | 1 (0.3)                          | n/a |
| <b>Neural Tube Defects</b>                  |                                      |                                                  |      |                                    |     |                                  |     |
| No                                          | 107,093 (99.9)                       | 43,928 (99.8)                                    |      | 24,077 (99.9)                      |     | 762 (100)                        |     |
| Yes                                         | 50 (0.1)                             | 70 (0.2)                                         | 1000 | 22 (0.1)                           | n/a | 0 (0.0)                          | n/a |
| <b>Amniotic Band Defects</b>                |                                      |                                                  |      |                                    |     |                                  |     |
| No                                          | 107,053 (99.9)                       | 43,936 (99.9)                                    |      | 24,070 (99.9)                      |     | 760 (99.7)                       |     |
| Yes                                         | 90 (0.1)                             | 62 (0.1)                                         | n/a  | 29 (0.1)                           | n/a | 2 (0.3)                          | 500 |
| <b>Hypospadias (only males included)</b>    |                                      |                                                  |      |                                    |     |                                  |     |
| No                                          | 54,607 (99.5)                        | 22,600 (98.9)                                    |      | 12,258 (99.2)                      |     | 390 (98.7)                       |     |
| Yes                                         | 259 (0.3)                            | 252 (1.1)                                        | 125  | 96 (0.8)                           | 200 | 5 (1.3)                          | 100 |
| <b>Gastroschisis</b>                        |                                      |                                                  |      |                                    |     |                                  |     |
| No                                          | 107,120 (99.9)                       | 43,979 (99.9)                                    |      | 24,089 (99.9)                      |     | 762(100)                         |     |
| Yes                                         | 23 (0.1)                             | 19 (0.1)                                         | n/a  | 10 (0.1)                           | n/a | 0 (0.0)                          | n/a |
| <b>At least one outcome*</b>                |                                      |                                                  |      |                                    |     |                                  |     |
| No                                          | 106,367<br>(99.3%)                   | 43,363 (98.6%)                                   |      | 23,835 (98.9%)                     |     | 754 (99.0%)                      |     |
| Yes                                         | 776 (0.7%)                           | 635 (1.4%)                                       | 142  | 264 (1.1%)                         | 250 | 8 (1.0%)                         | 333 |

n/a, not applicable

**Table S2.** Numbers needed to harm (NNH) for exposure to diclofenac (years 2005-2015).

| Outcomes                                    | No analgesic<br>(n=20,544)<br>n (%) | Diclofenac<br>2005-2015<br>(n=10,291)<br>n (%) | NNH |
|---------------------------------------------|-------------------------------------|------------------------------------------------|-----|
| <b>Gestation at delivery (weeks)</b>        |                                     |                                                |     |
| >=37                                        | 19,407 (94.5%)                      | 9,640 (93.7%)                                  |     |
| <37                                         | 1,137 (5.5%)                        | 651 (6.3%)                                     | 125 |
| <b>Pregnancy outcome</b>                    |                                     |                                                |     |
| Livebirth                                   | 20,393 (99.3%)                      | 10,227 (99.4%)                                 |     |
| Stillbirth                                  | 116 (0.5%)                          | 39 (0.4%)                                      | n/a |
| Neonatal Death                              | 35 (0.2%)                           | 25 (0.2%)                                      | n/a |
| <b>Weight of baby (grams)</b>               |                                     |                                                |     |
| NBW                                         | 16,869 (82.1%)                      | 8,116 (78.9%)                                  |     |
| LBW                                         | 965 (4.7%)                          | 572 (5.6%)                                     | 111 |
| HBW                                         | 2,707 (13.2%)                       | 1,600 (15.5%)                                  | 44  |
| Missing                                     | 3 (0.0%)                            | 3 (0.0%)                                       |     |
| <b>Admitted to neonatal unit</b>            |                                     |                                                |     |
| No                                          | 18,224 (88.7%)                      | 8,747 (85.0%)                                  |     |
| Yes                                         | 2,175 (10.6%)                       | 1,492 (14.5%)                                  | 26  |
| Missing                                     | 145 (0.7%)                          | 52 (0.5%)                                      |     |
| <b>APGAR score at 1 min</b>                 |                                     |                                                |     |
| Normal                                      | 18,709 (91.1%)                      | 9,350 (90.9%)                                  |     |
| <7                                          | 1,658 (8.1%)                        | 924 (9.0%)                                     | 111 |
| Missing                                     | 177 (0.9%)                          | 17 (0.2%)                                      |     |
| <b>APGAR score at 5 min</b>                 |                                     |                                                |     |
| Normal                                      | 20,065 (97.7%)                      | 10,096 (98.1%)                                 |     |
| <7                                          | 302 (1.5%)                          | 177 (1.7%)                                     | 500 |
| Missing                                     | 177 (0.9%)                          | 18 (0.2%)                                      |     |
| <b>Cryptorchidism (only males included)</b> |                                     |                                                |     |
| No                                          | 10,284 (98.7%)                      | 5,314 (98.7%)                                  |     |
| Yes                                         | 133 (1.3%)                          | 70 (1.3%)                                      | n/a |
| <b>Neural Tube Defects</b>                  |                                     |                                                |     |
| No                                          | 20,527 (99.9%)                      | 10,263 (99.7%)                                 |     |
| Yes                                         | 17 (0.1%)                           | 28 (0.3%)                                      | 500 |
| <b>Amniotic Band Defects</b>                |                                     |                                                |     |
| No                                          | 20,514 (99.9%)                      | 10,277 (99.9%)                                 |     |
| Yes                                         | 30 (0.1%)                           | 14 (0.1%)                                      | n/a |
| <b>Hypospadias (only males included)</b>    |                                     |                                                |     |
| No                                          | 10,317 (99.0%)                      | 5,308 (98.6%)                                  |     |
| Yes                                         | 100 (1.0%)                          | 76 (1.4%)                                      | 250 |
| <b>Gastroschisis</b>                        |                                     |                                                |     |
| No                                          | 20,538 (99.9%)                      | 10,284 (99.9%)                                 |     |
| Yes                                         | 6 (0.1%)                            | 7 (0.1%)                                       | n/a |
| <b>At least one outcome*</b>                |                                     |                                                |     |
| No                                          | 20,258 (98.6%)                      | 10,097 (98.1%)                                 |     |
| Yes                                         | 286 (1.4%)                          | 194 (1.9%)                                     | 200 |

n/a, not applicable

1  
2  
3  
4  
5  
6  
7  
8  
9  
10  
11  
12  
13  
14  
15  
16  
17  
18  
19  
20  
21  
22  
23  
24  
25  
26  
27  
28  
29  
30  
31  
32  
33  
34  
35  
36  
37  
38  
39  
40  
41

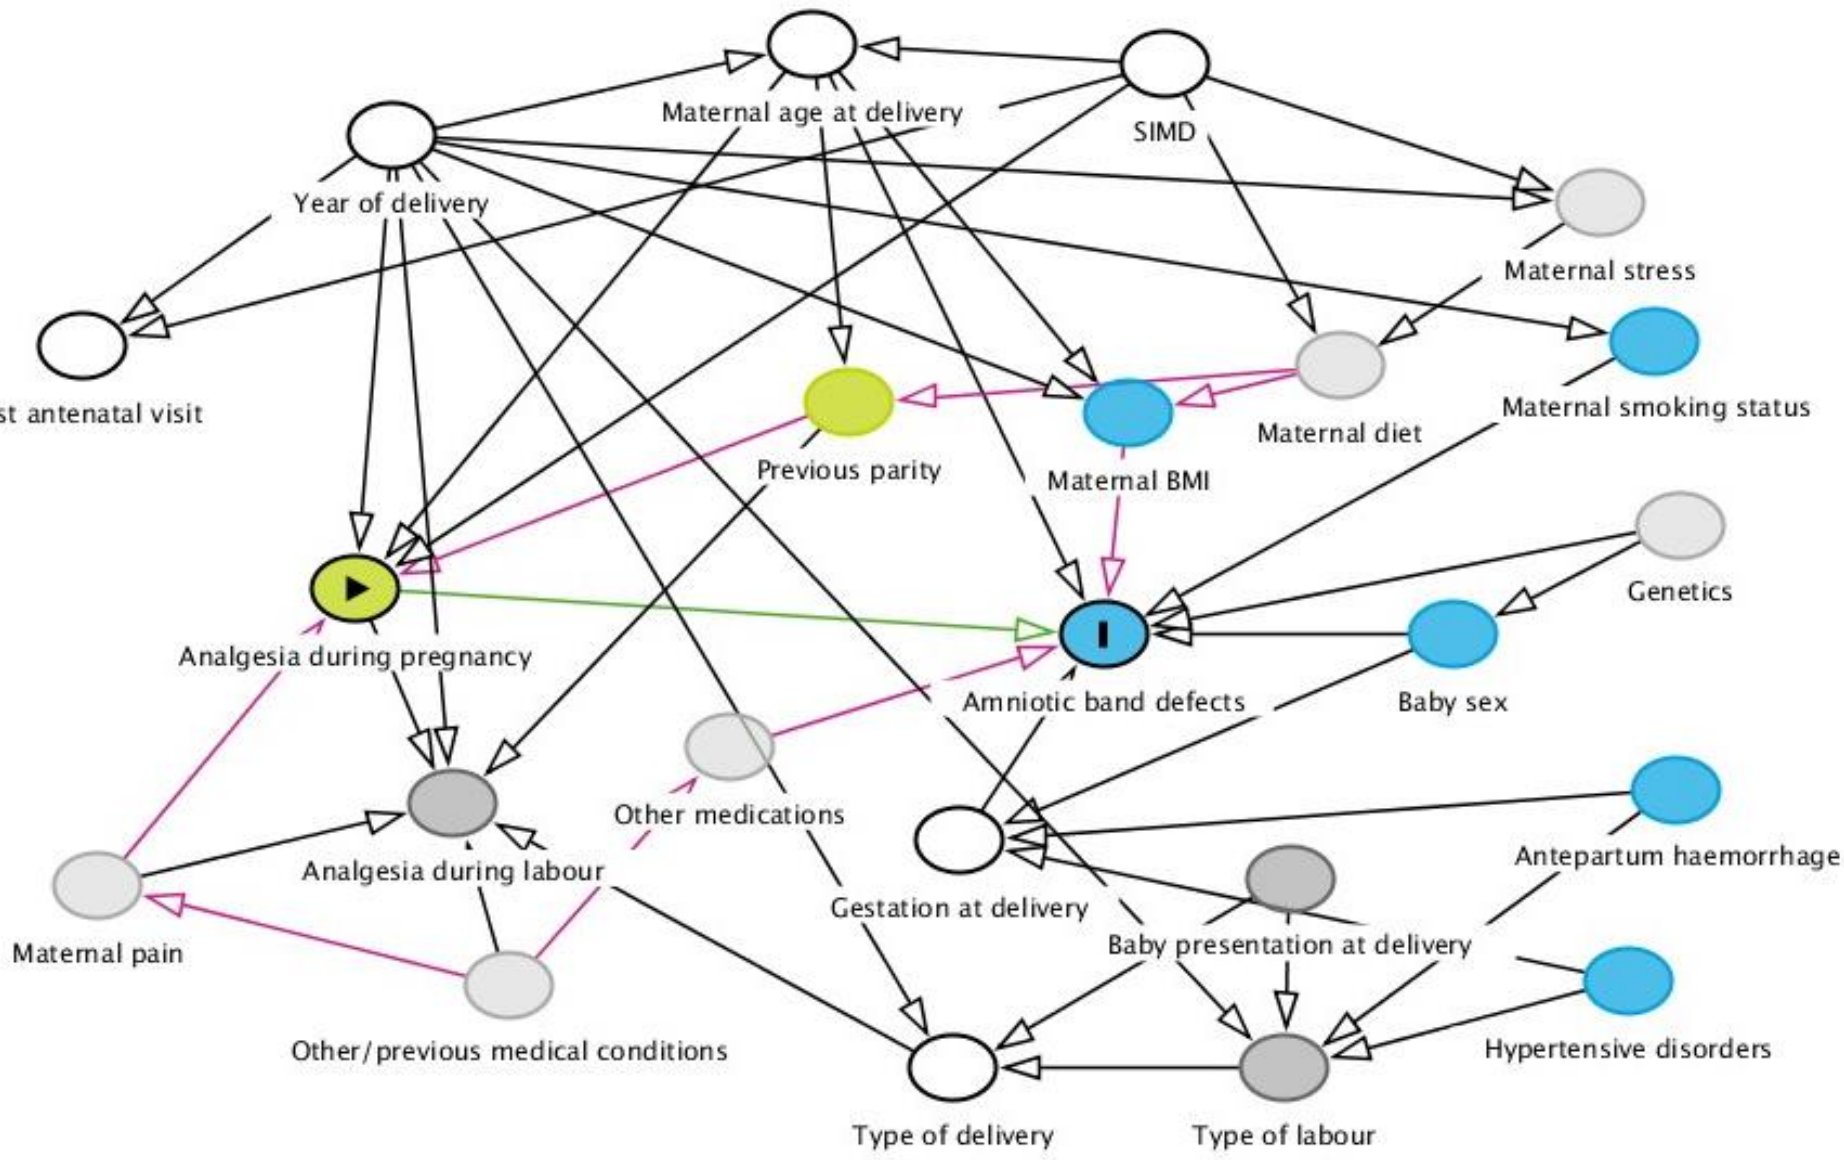



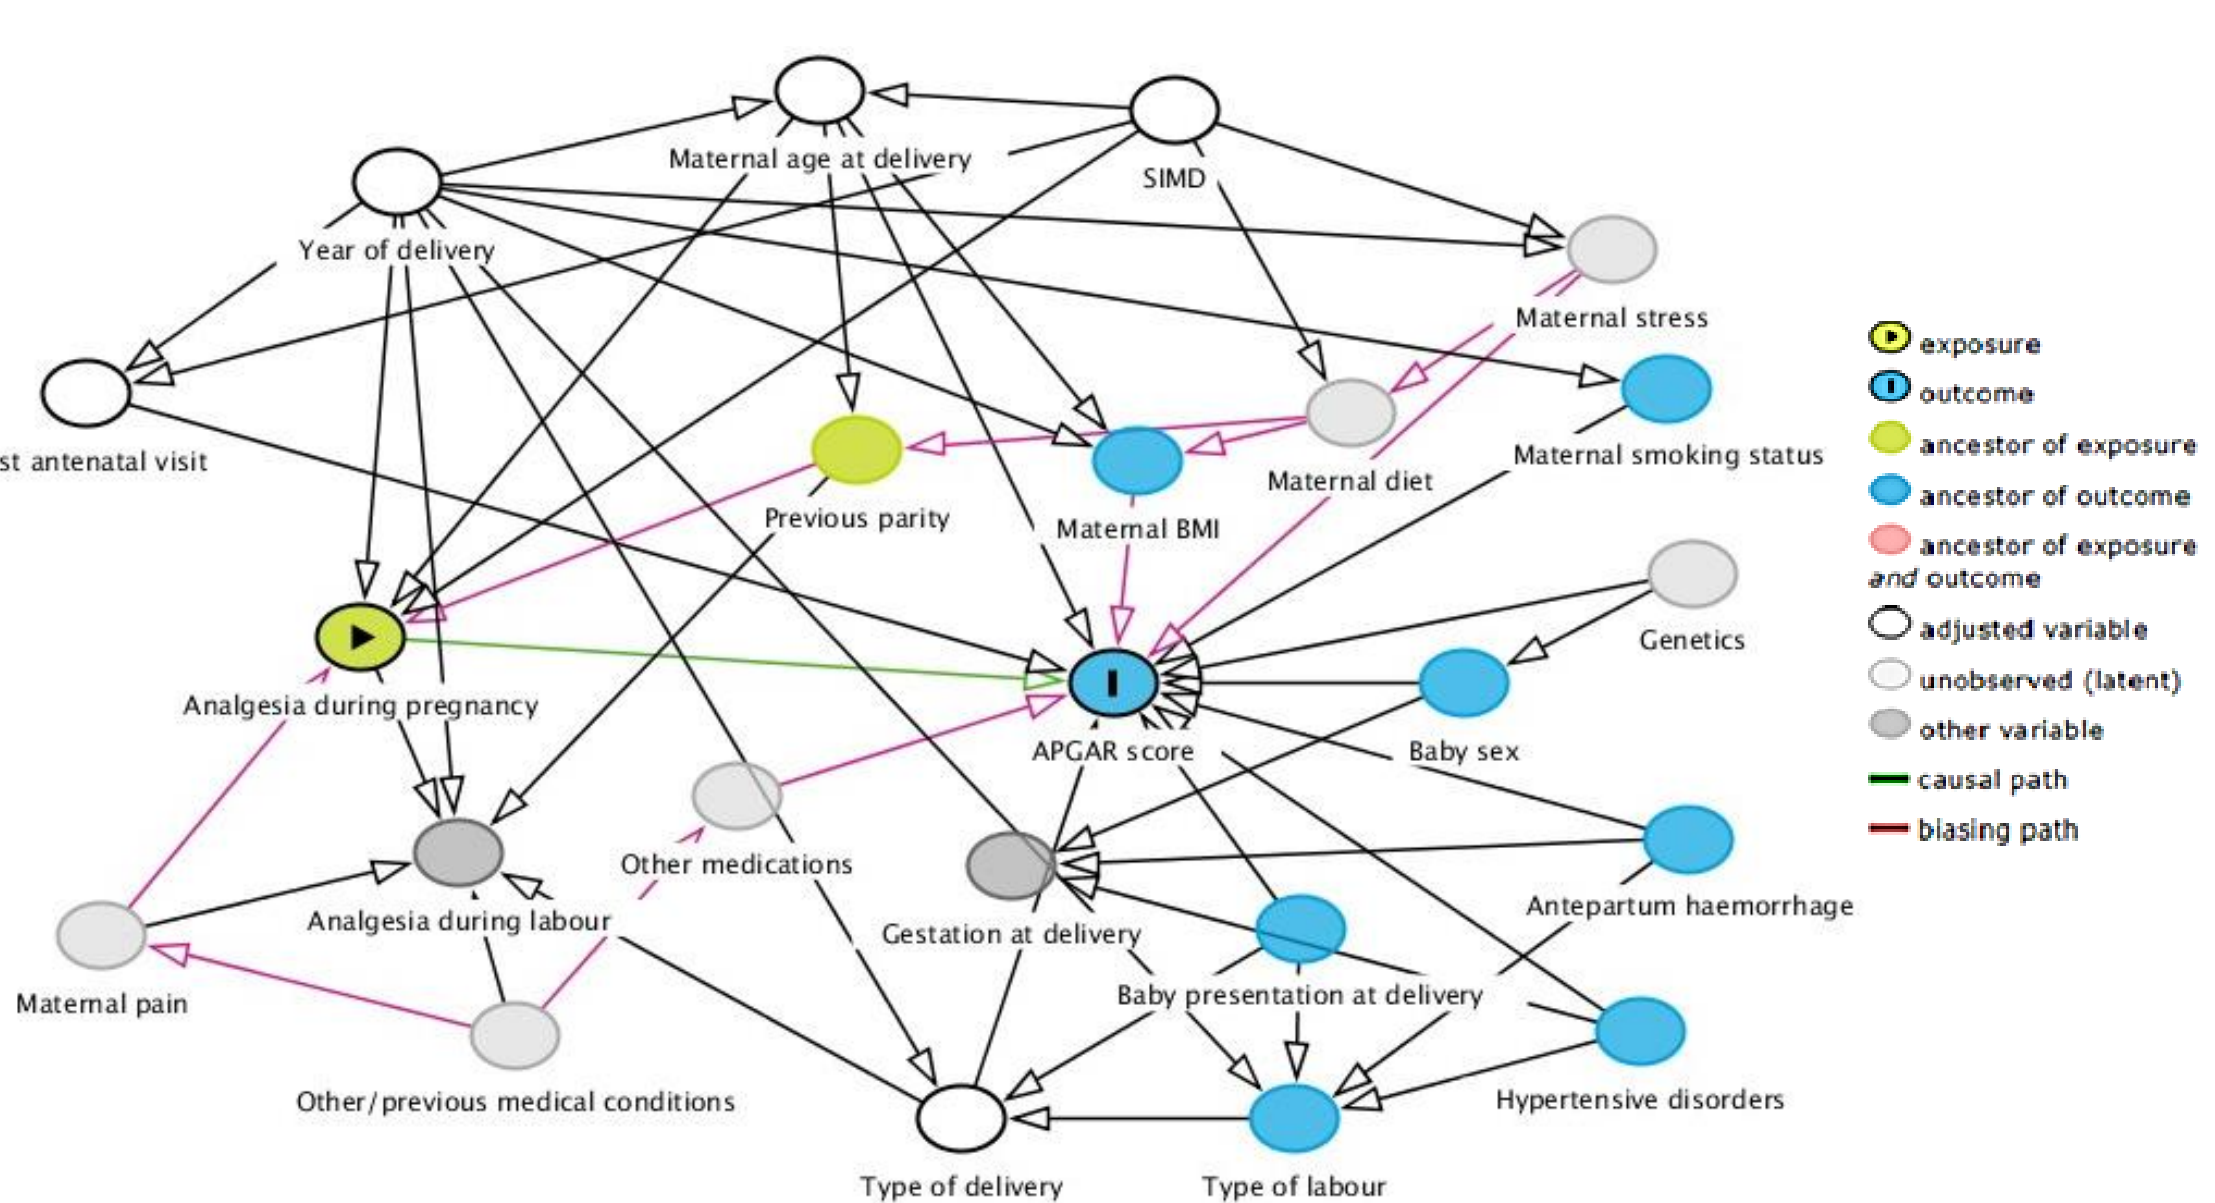

1  
2  
3  
4  
5  
6  
7  
8  
9  
10  
11  
12  
13  
14  
15  
16  
17  
18  
19  
20  
21  
22  
23  
24  
25  
26  
27  
28  
29  
30  
31  
32  
33  
34  
35  
36  
37  
38  
39  
40  
41

1  
2  
3  
4  
5  
6  
7  
8  
9  
10  
11  
12  
13  
14  
15  
16  
17  
18  
19  
20  
21  
22  
23  
24  
25  
26  
27  
28  
29  
30  
31  
32  
33  
34  
35  
36  
37  
38  
39  
40  
41

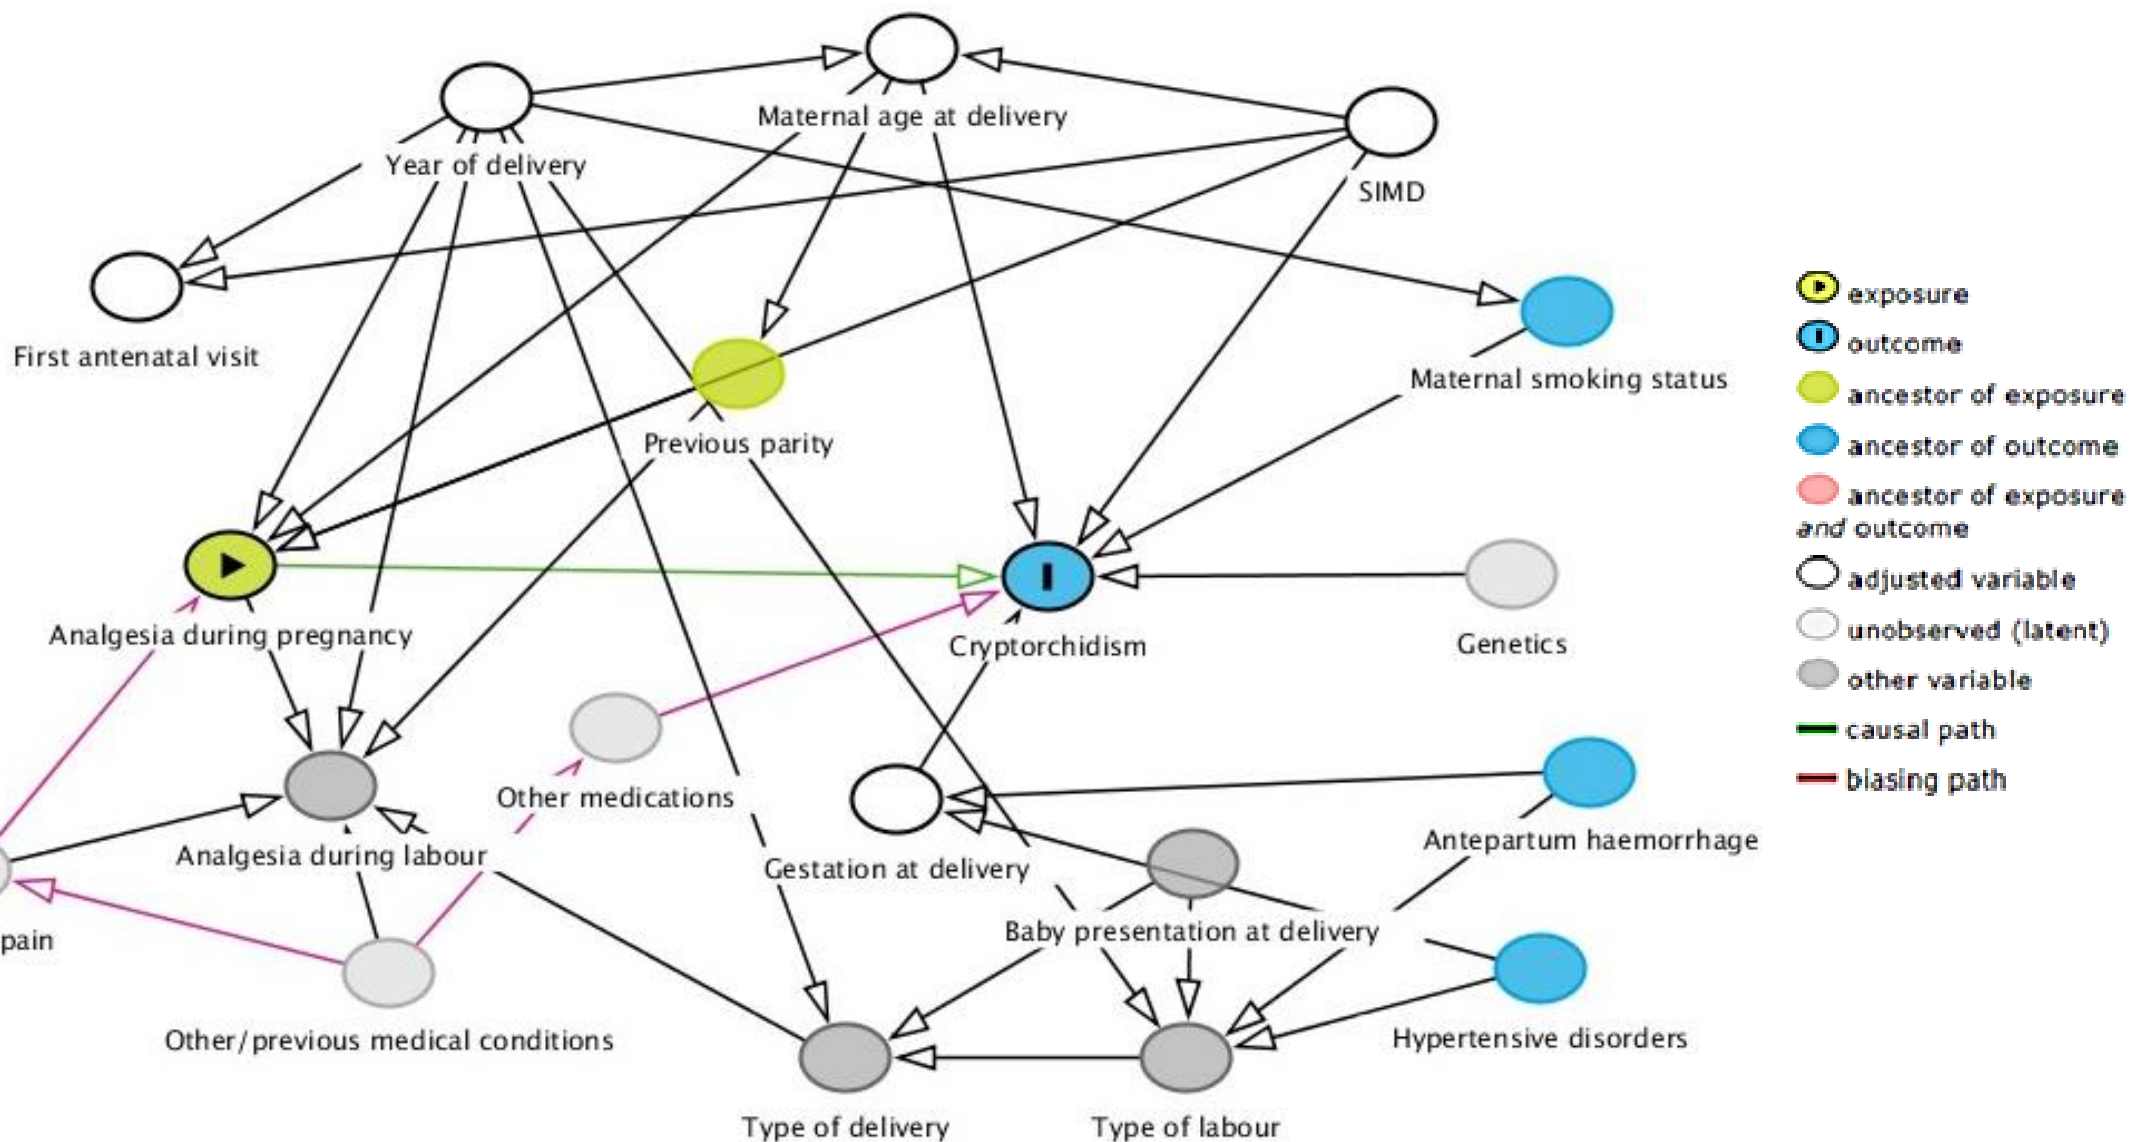



1  
2  
3  
4  
5  
6  
7  
8  
9  
10  
11  
12  
13  
14  
15  
16  
17  
18  
19  
20  
21  
22  
23  
24  
25  
26  
27  
28  
29  
30  
31  
32  
33  
34  
35  
36  
37  
38  
39  
40  
41

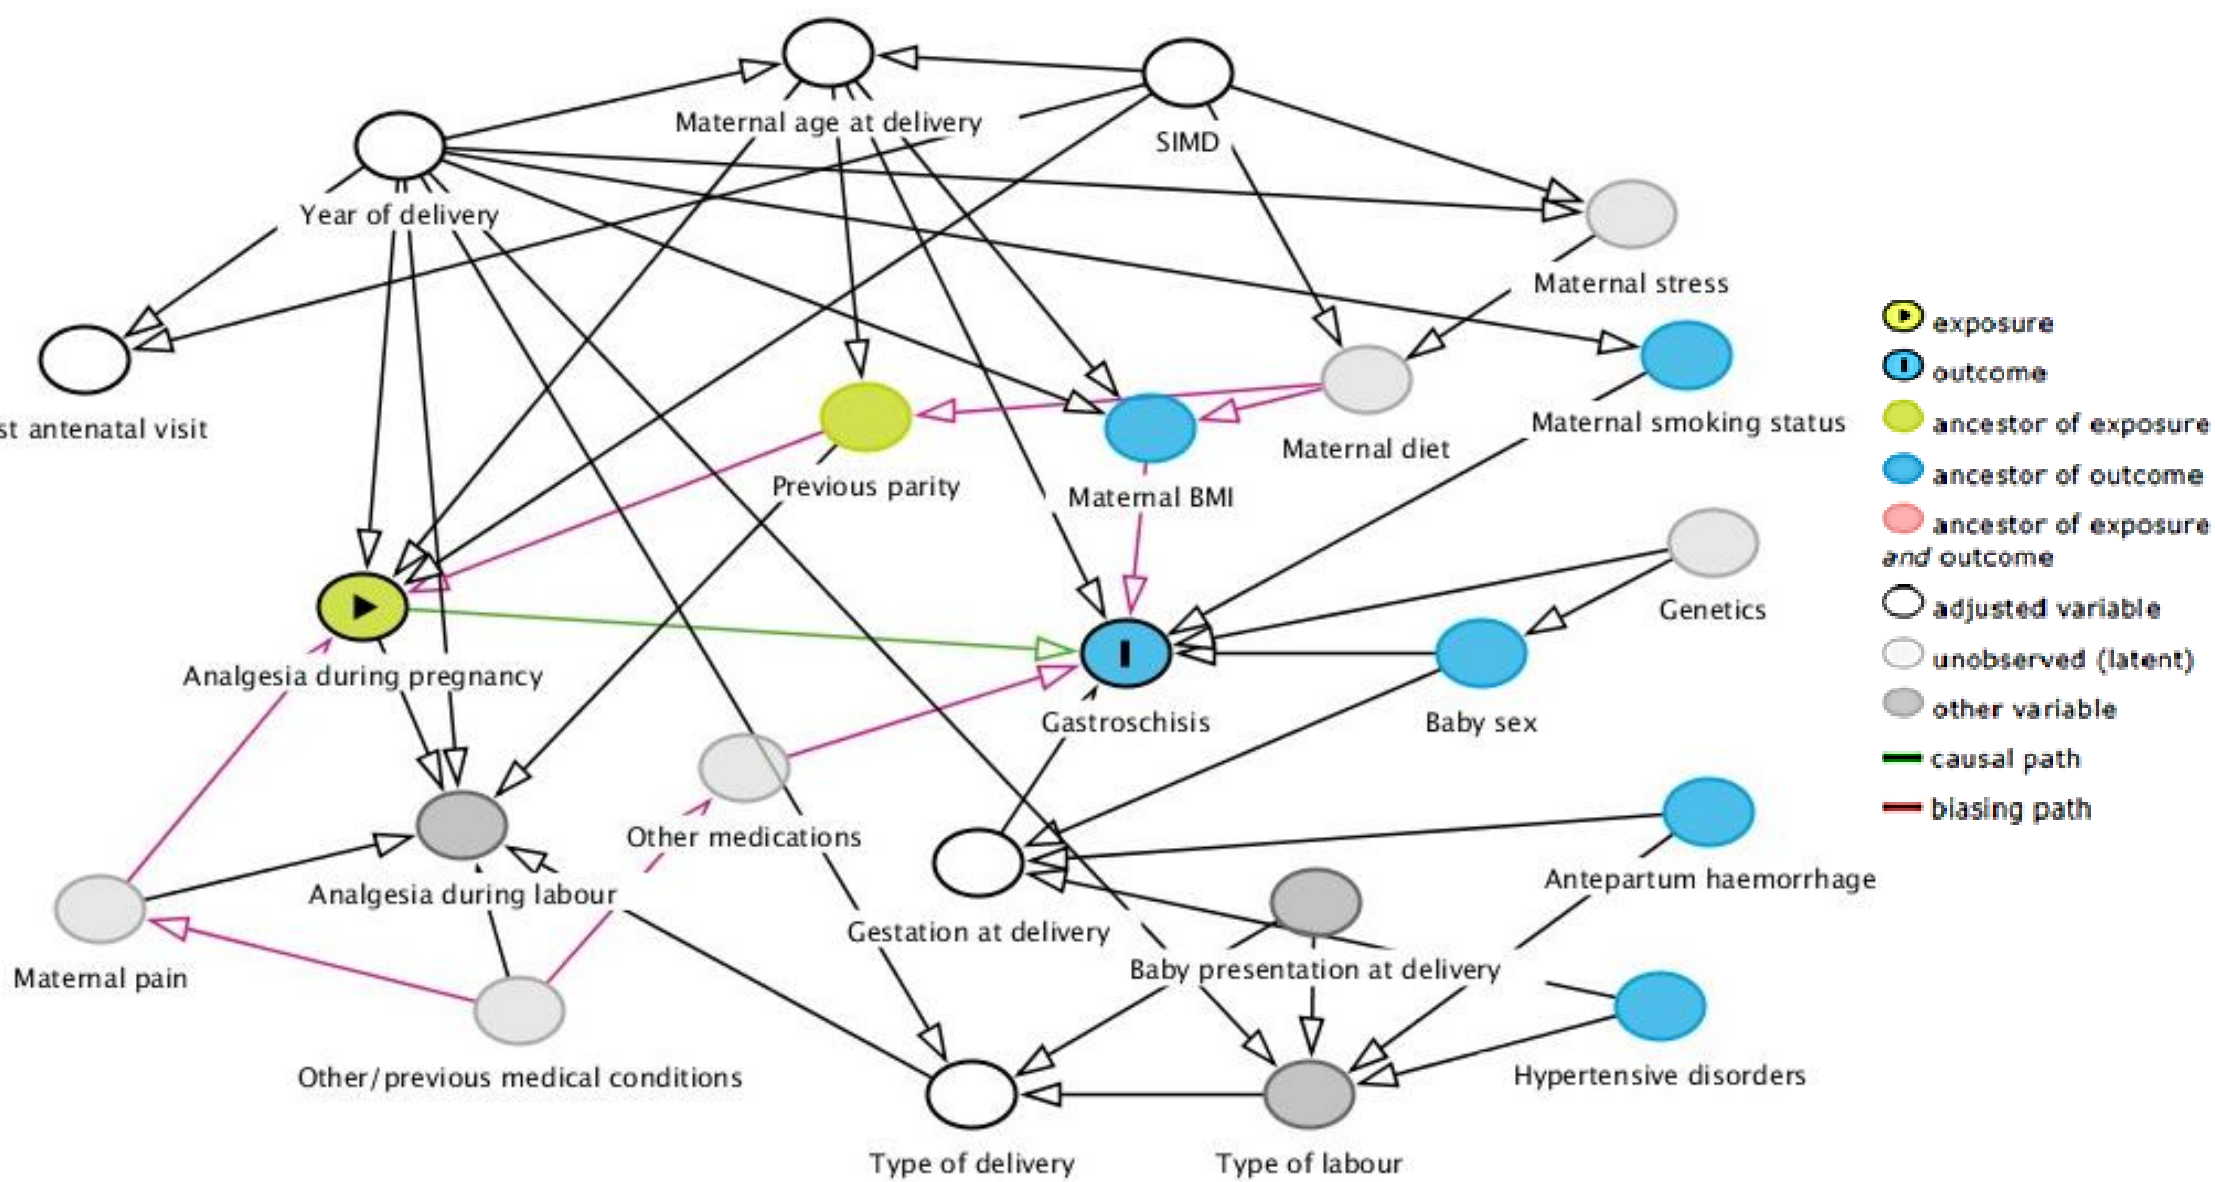



1  
2  
3  
4  
5  
6  
7  
8  
9  
10  
11  
12  
13  
14  
15  
16  
17  
18  
19  
20  
21  
22  
23  
24  
25  
26  
27  
28  
29  
30  
31  
32  
33  
34  
35  
36  
37  
38  
39  
40  
41

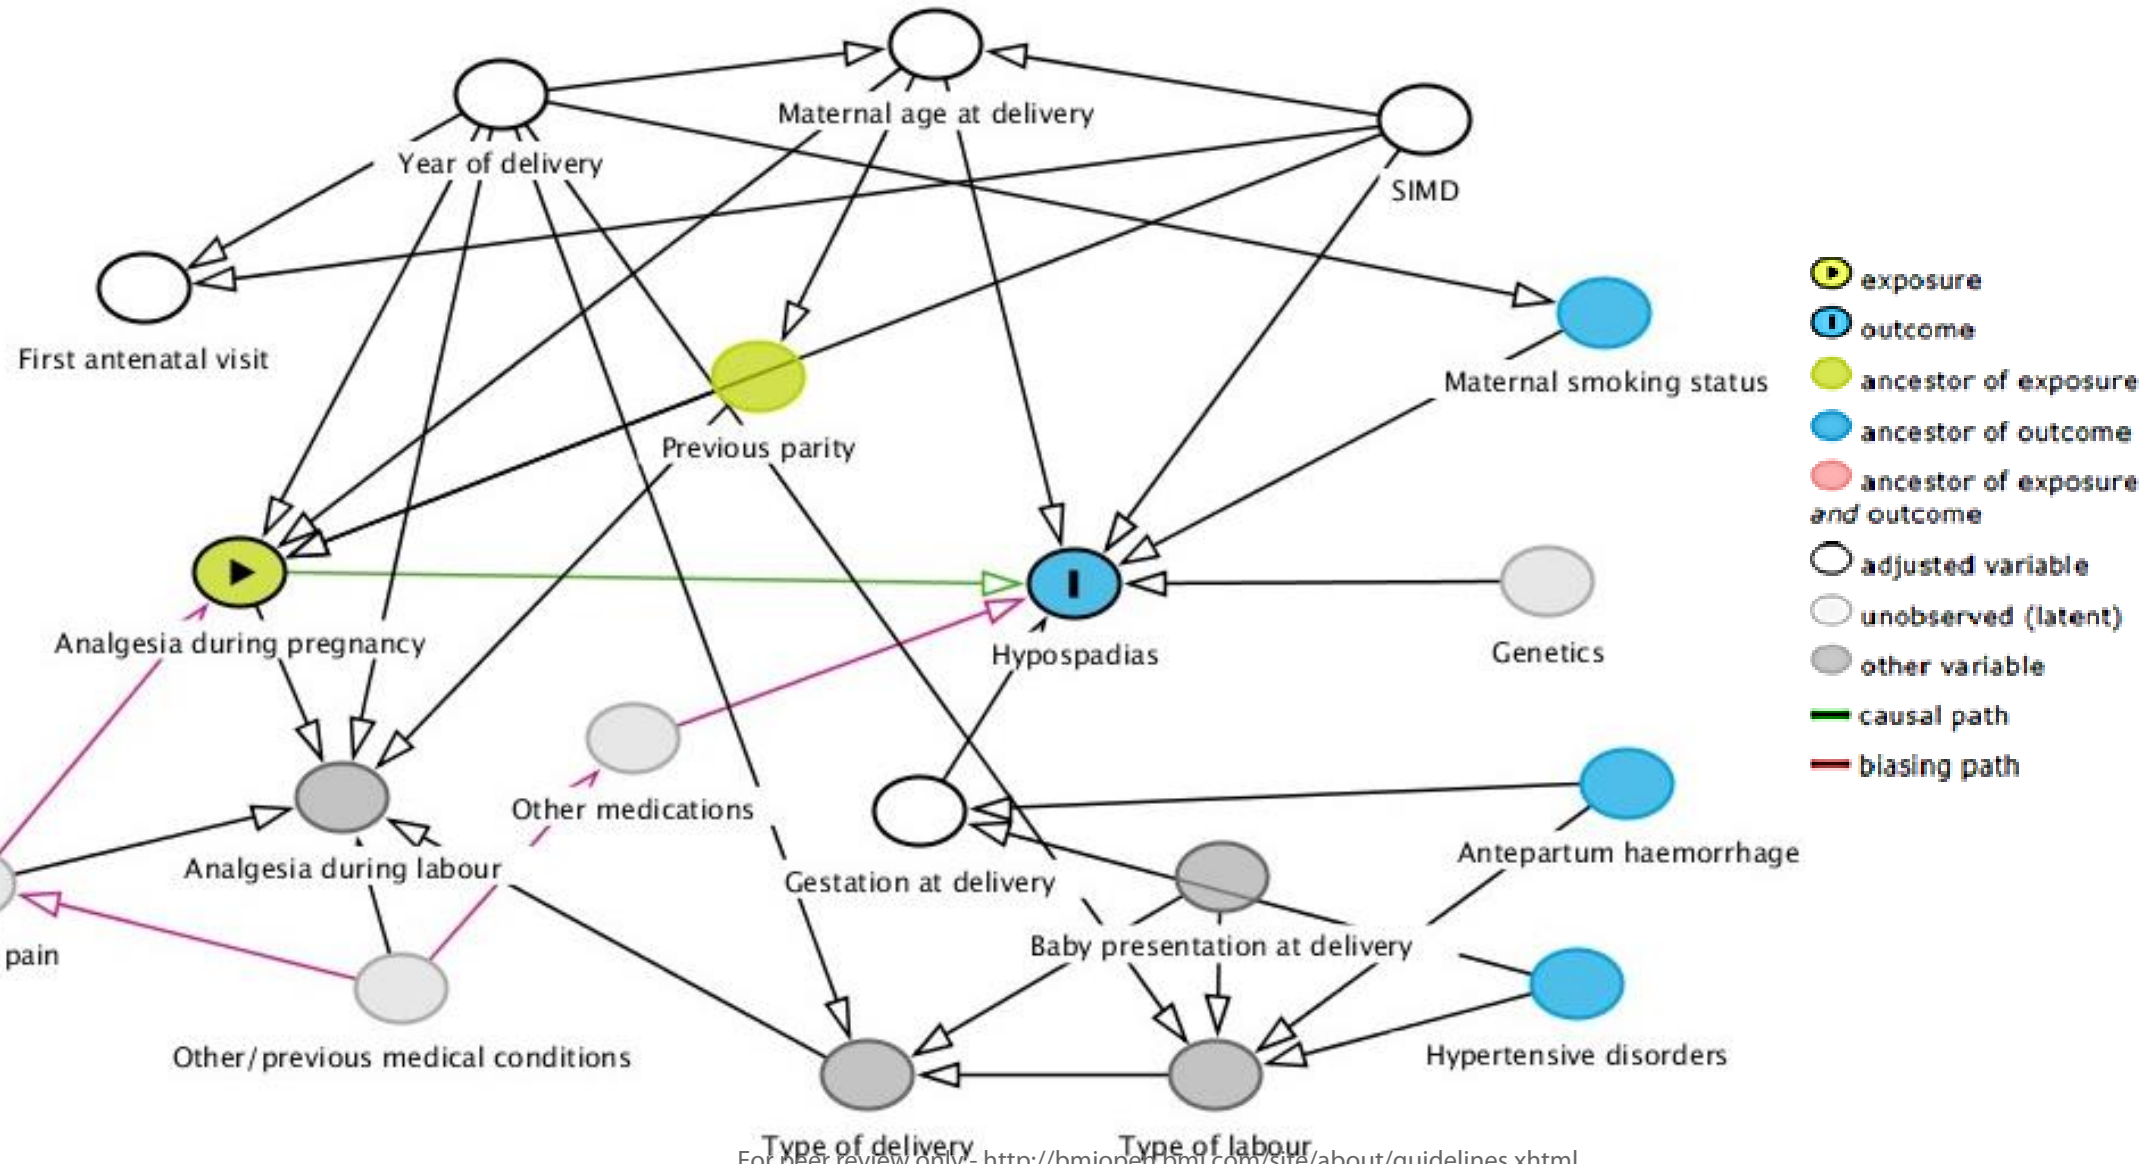



1  
2  
3  
4  
5  
6  
7  
8  
9  
10  
11  
12  
13  
14  
15  
16  
17  
18  
19  
20  
21  
22  
23  
24  
25  
26  
27  
28  
29  
30  
31  
32  
33  
34  
35  
36  
37  
38  
39  
40  
41

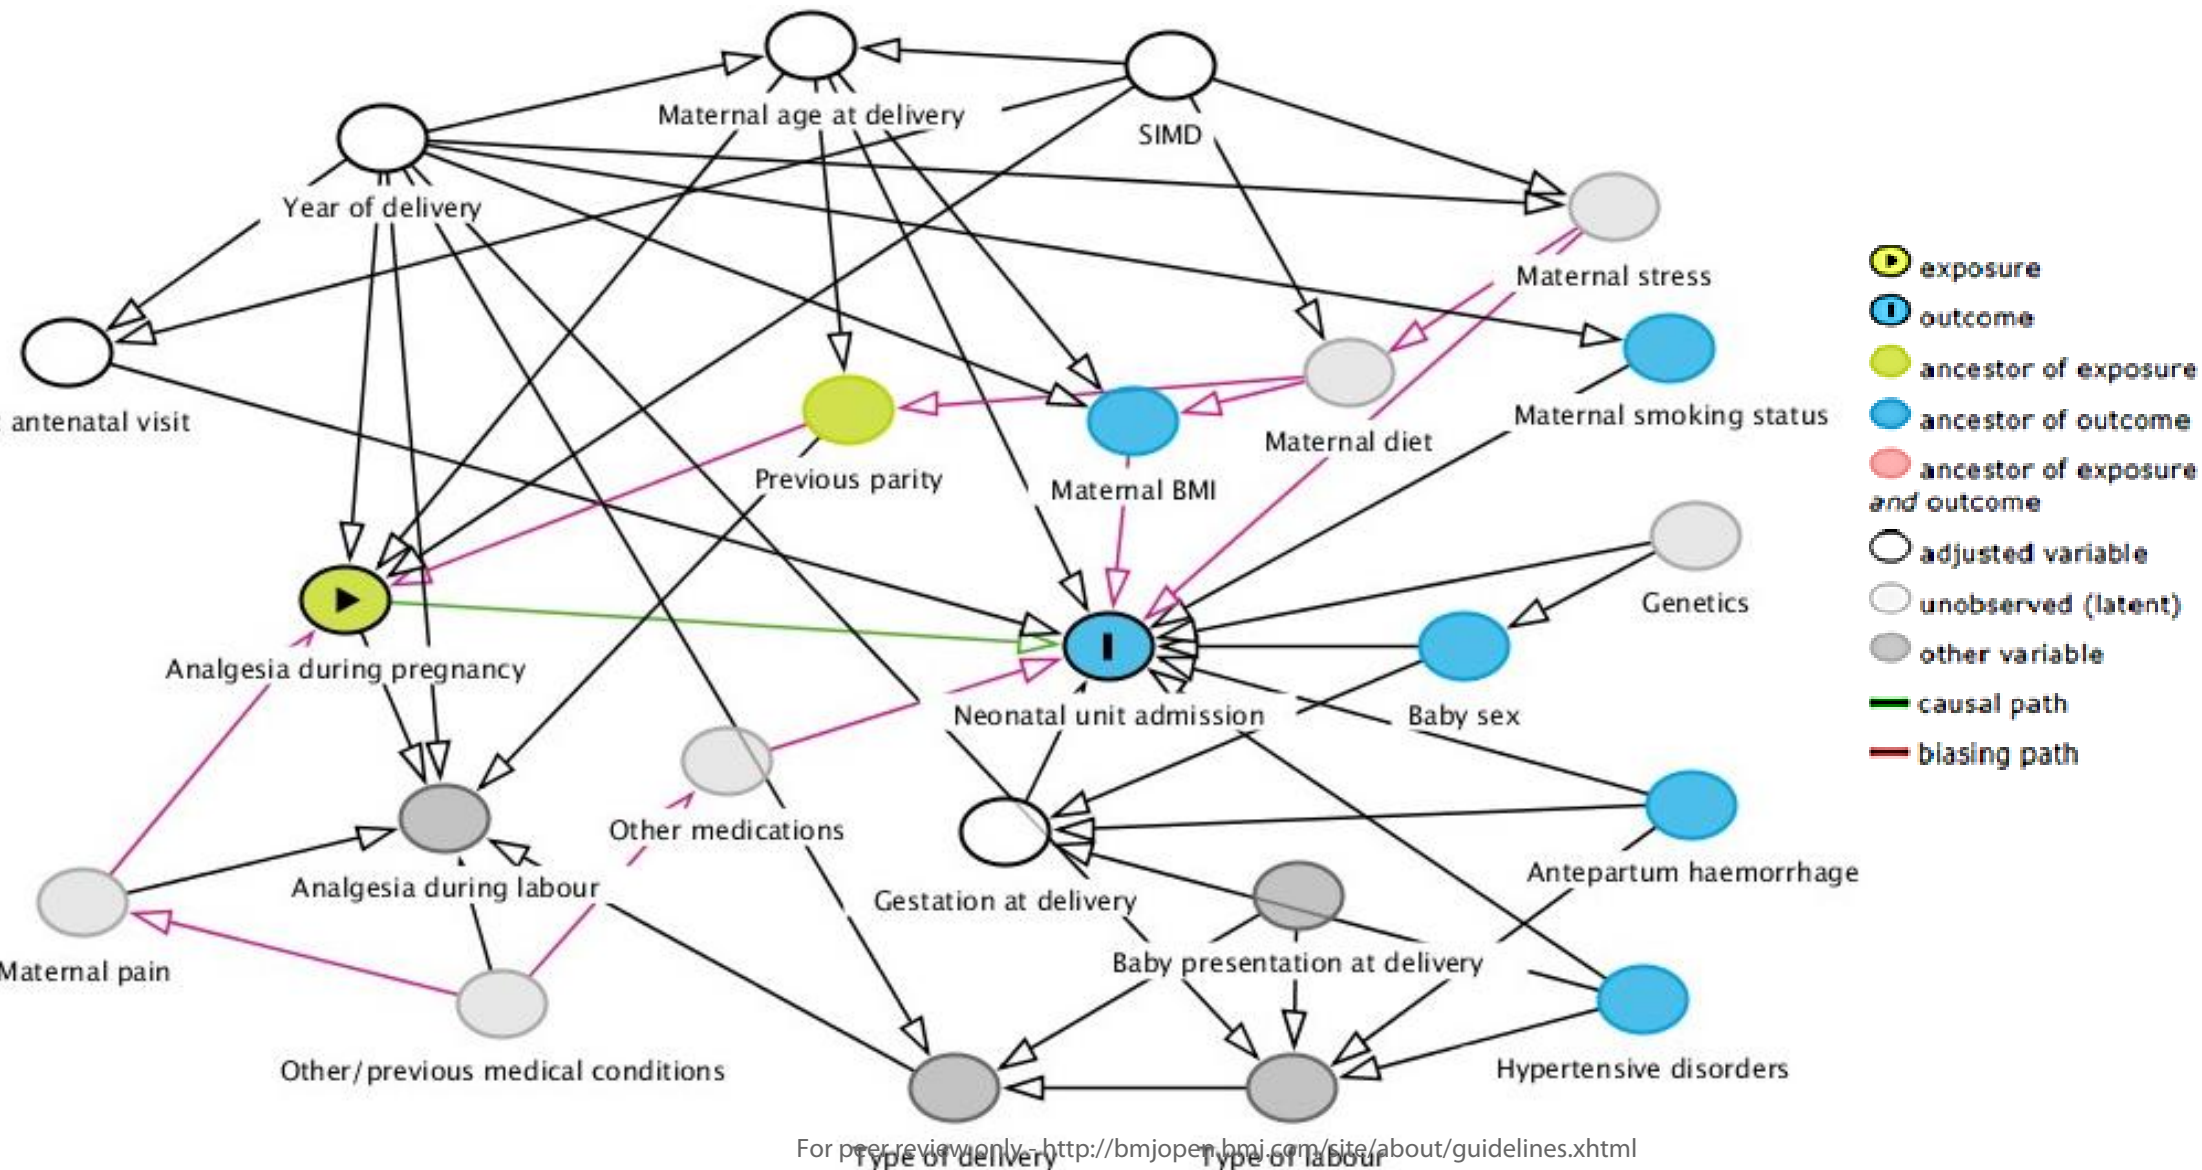

1  
2  
3  
4  
5  
6  
7  
8  
9  
10  
11  
12  
13  
14  
15  
16  
17  
18  
19  
20  
21  
22  
23  
24  
25  
26  
27  
28  
29  
30  
31  
32  
33  
34  
35  
36  
37  
38  
39  
40  
41

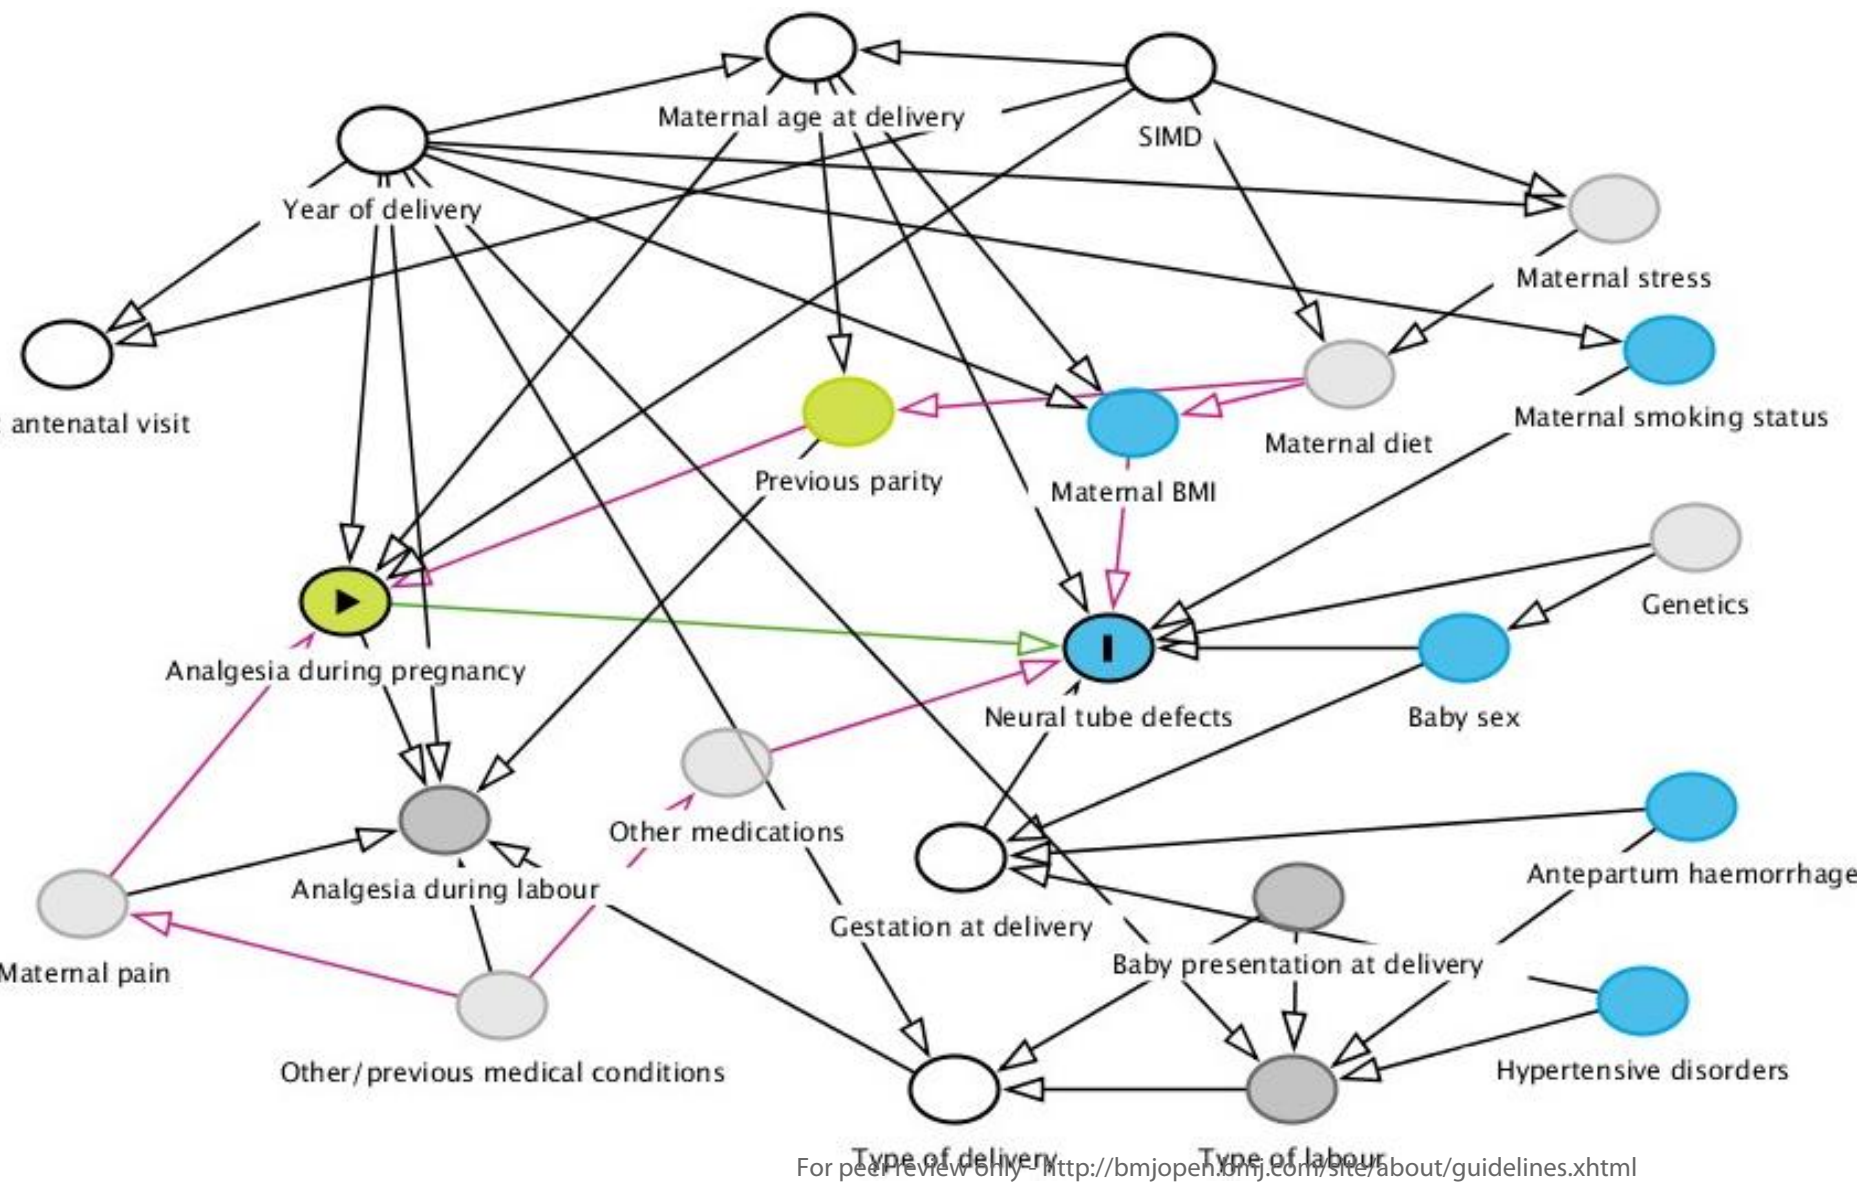

- exposure
- outcome
- ancestor of exposure
- ancestor of outcome
- ancestor of exposure and outcome
- adjusted variable
- unobserved (latent)
- other variable
- causal path
- biasing path



1  
2  
3  
4  
5  
6  
7  
8  
9  
10  
11  
12  
13  
14  
15  
16  
17  
18  
19  
20  
21  
22  
23  
24  
25  
26  
27  
28  
29  
30  
31  
32  
33  
34  
35  
36  
37  
38  
39  
40  
41

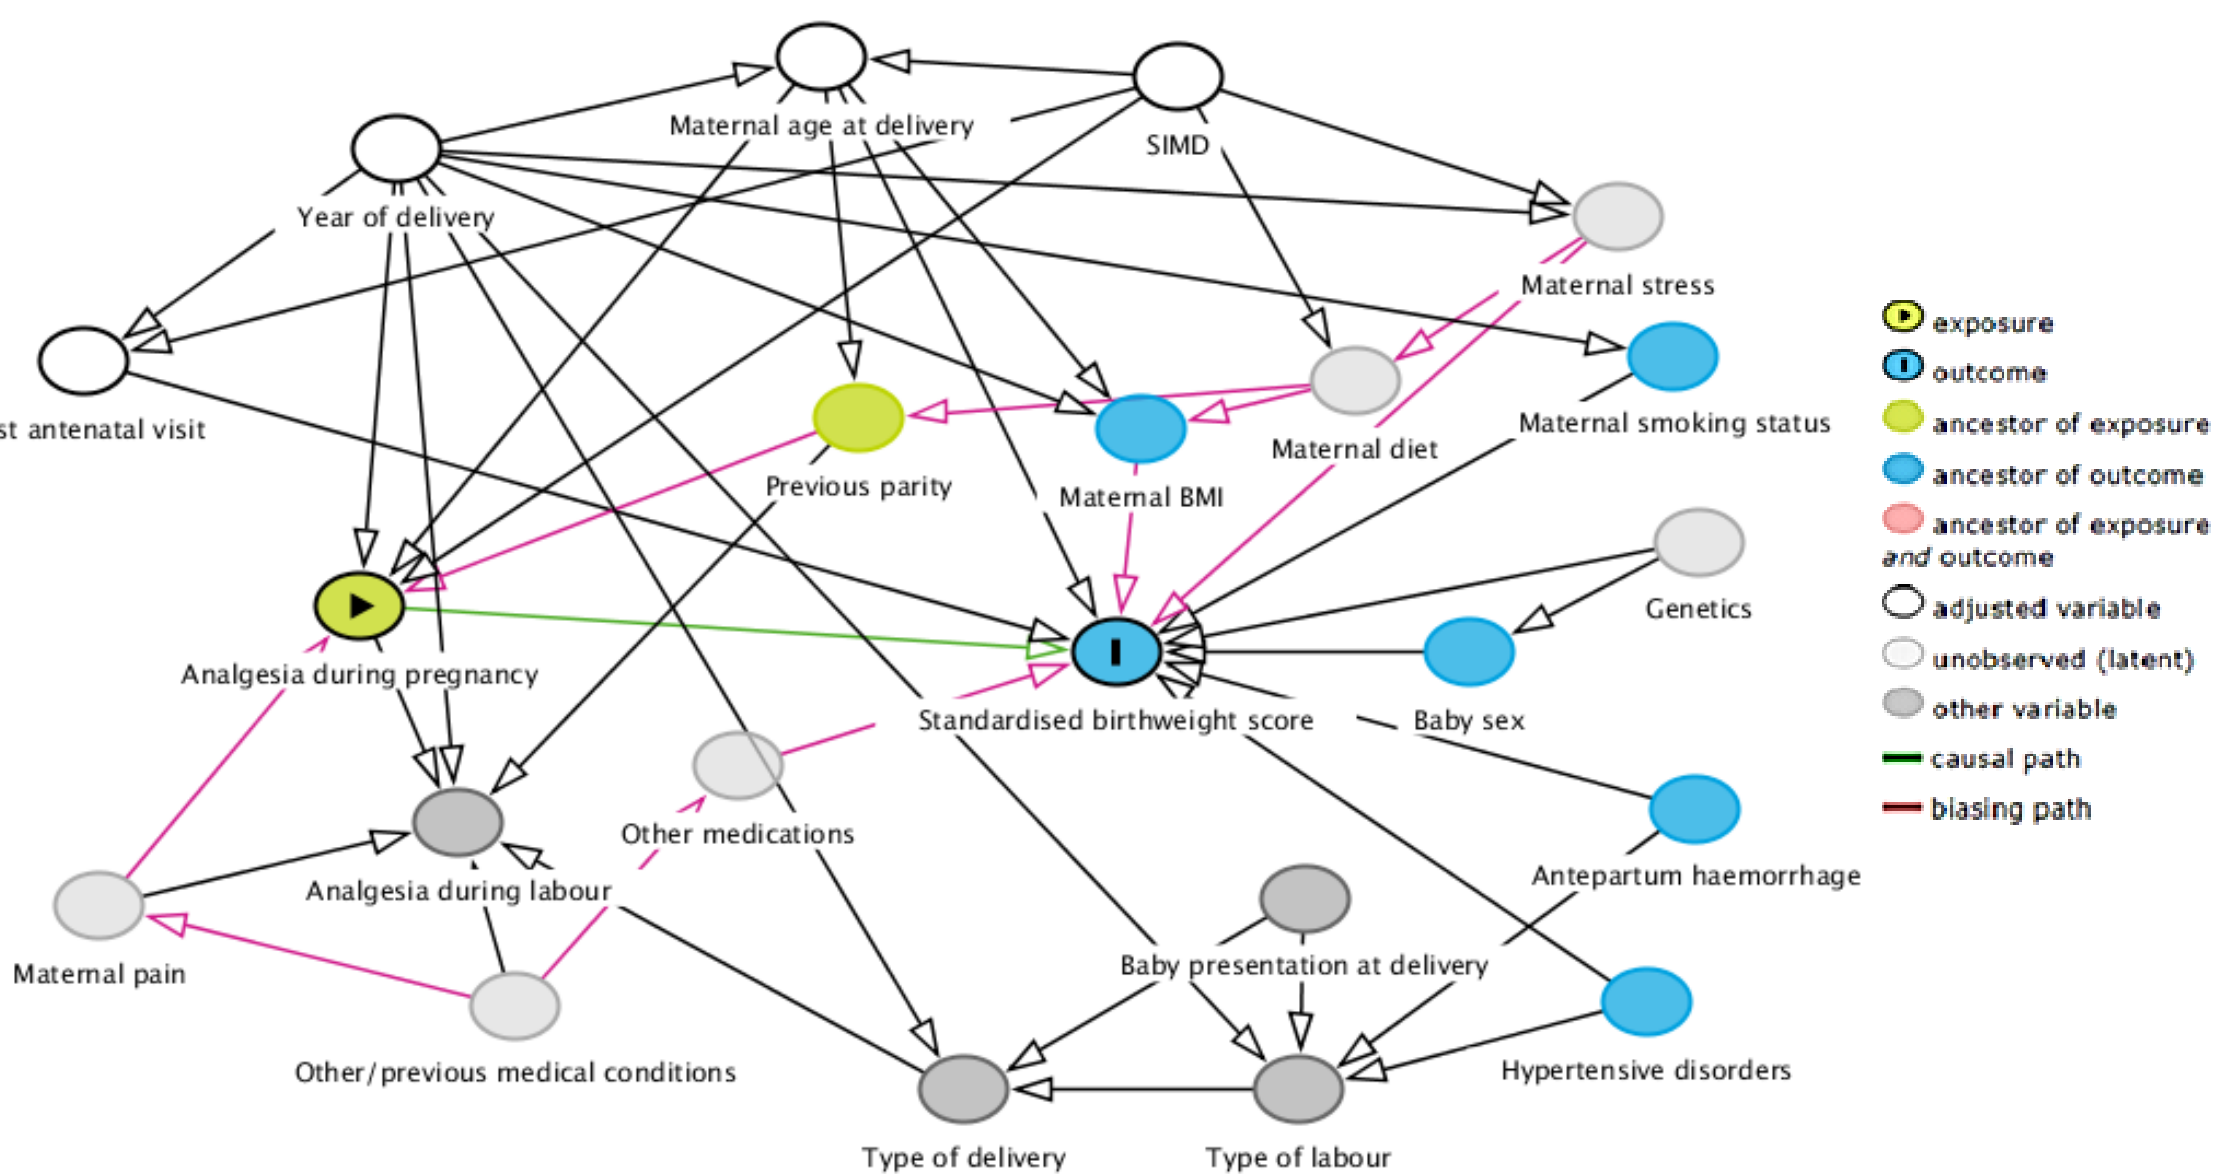



1  
2  
3  
4  
5  
6  
7  
8  
9  
10  
11  
12  
13  
14  
15  
16  
17  
18  
19  
20  
21  
22  
23  
24  
25  
26  
27  
28  
29  
30  
31  
32  
33  
34  
35  
36  
37  
38  
39  
40  
41

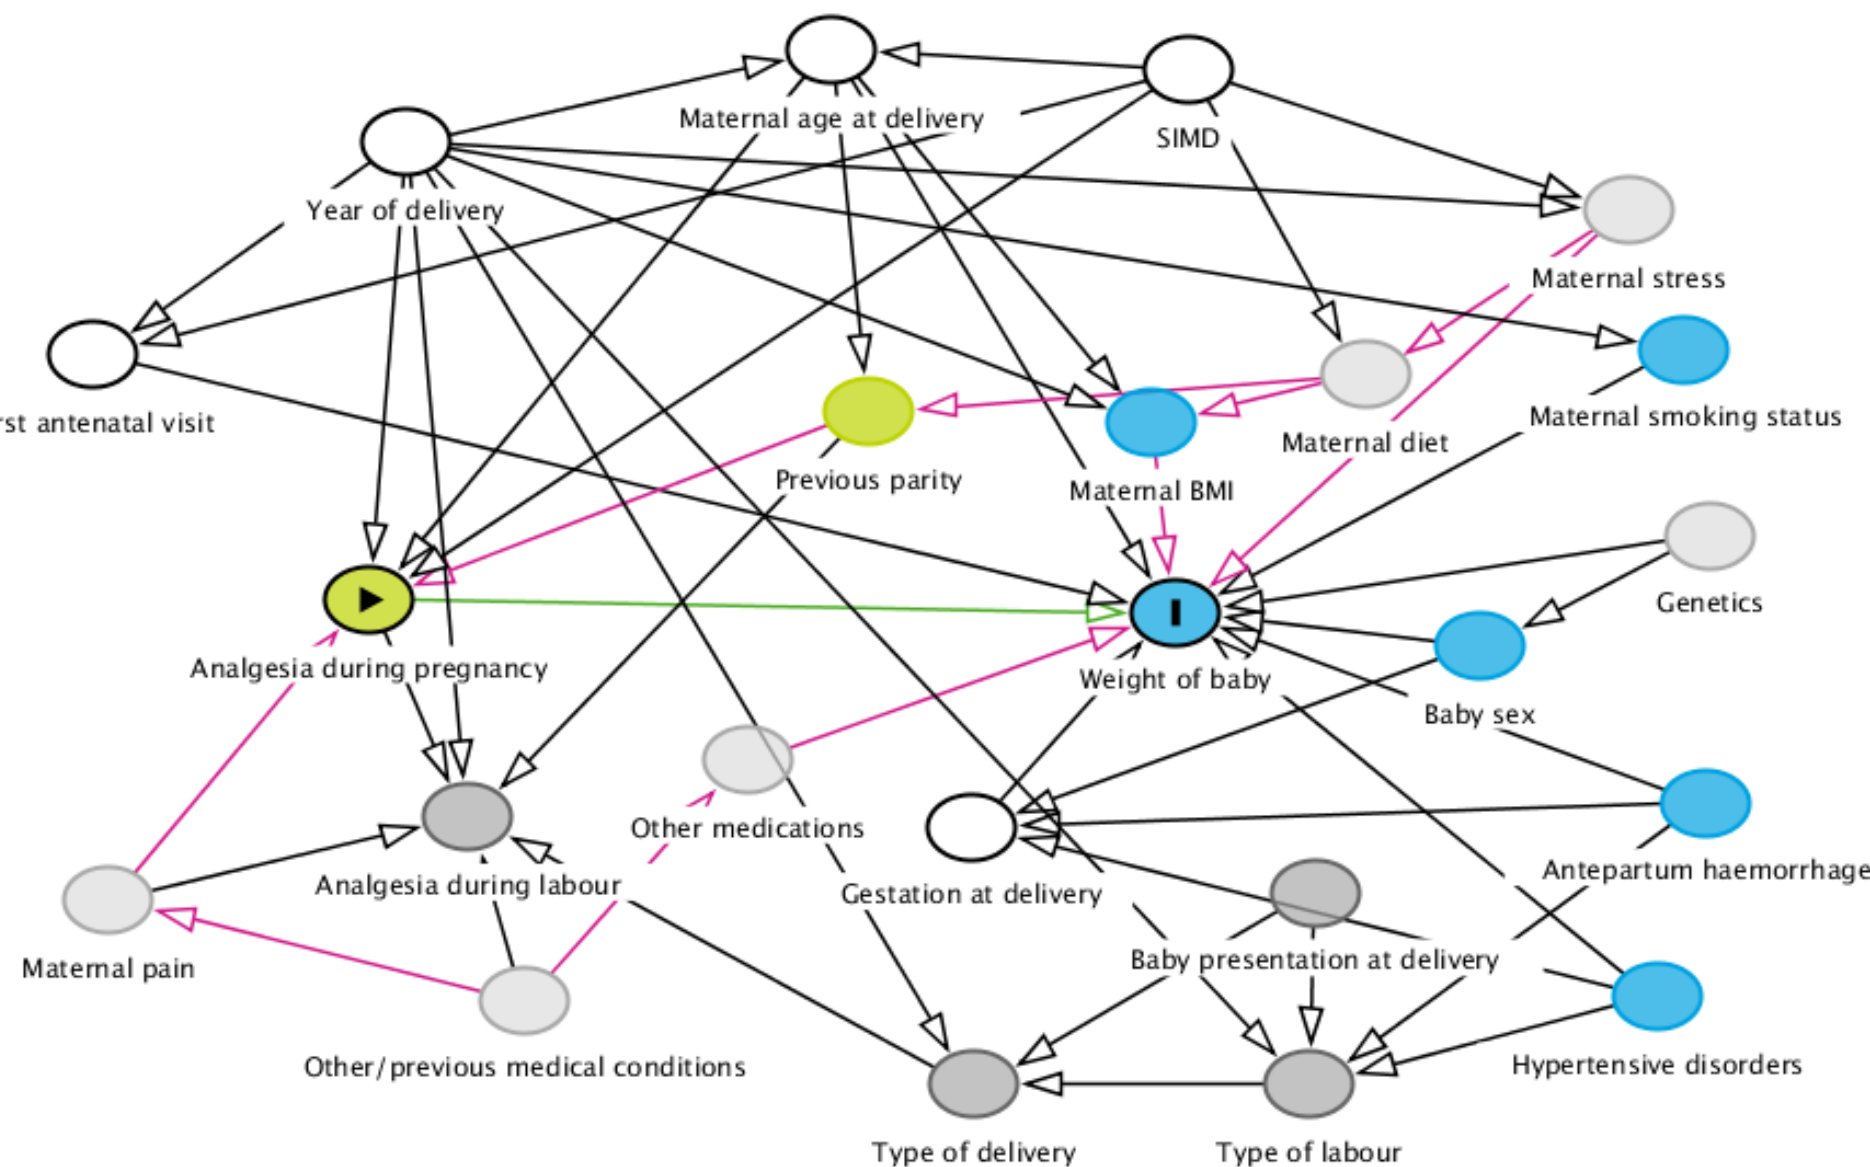

- exposure
- outcome
- ancestor of exposure
- ancestor of outcome
- ancestor of exposure and outcome
- adjusted variable
- unobserved (latent)
- other variable
- causal path
- biasing path



STROBE Statement—Checklist of items that should be included in reports of *cohort studies*

|                           | Item No | Recommendation                                                                                                                                                                       | Paragraph #                                                          |
|---------------------------|---------|--------------------------------------------------------------------------------------------------------------------------------------------------------------------------------------|----------------------------------------------------------------------|
| <b>Title and abstract</b> | 1       | (a) Indicate the study's design with a commonly used term in the title or the abstract                                                                                               | <b>Title &amp; Abstract</b><br><b>Pages 1-3</b>                      |
|                           |         | (b) Provide in the abstract an informative and balanced summary of what was done and what was found                                                                                  | <b>Abstract</b><br><b>Pages 2-3</b>                                  |
| <b>Introduction</b>       |         |                                                                                                                                                                                      |                                                                      |
| Background/rationale      | 2       | Explain the scientific background and rationale for the investigation being reported                                                                                                 | <b>Introduction</b><br><b>Page 5</b>                                 |
| Objectives                | 3       | State specific objectives, including any prespecified hypotheses                                                                                                                     | <b>Introduction</b><br><b>Page 5</b>                                 |
| <b>Methods</b>            |         |                                                                                                                                                                                      |                                                                      |
| Study design              | 4       | Present key elements of study design early in the paper                                                                                                                              | <b>Methods</b><br><b>Page 7</b>                                      |
| Setting                   | 5       | Describe the setting, locations, and relevant dates, including periods of recruitment, exposure, follow-up, and data collection                                                      | <b>Methods</b><br><b>Page 7</b>                                      |
| Participants              | 6       | (a) Give the eligibility criteria, and the sources and methods of selection of participants. Describe methods of follow-up                                                           | <b>Methods</b><br><b>Pages 7-8</b>                                   |
|                           |         | (b) For matched studies, give matching criteria and number of exposed and unexposed                                                                                                  | n/a                                                                  |
| Variables                 | 7       | Clearly define all outcomes, exposures, predictors, potential confounders, and effect modifiers. Give diagnostic criteria, if applicable                                             | <b>Methods</b><br><b>Pages 8-9</b>                                   |
| Data sources/measurement  | 8*      | For each variable of interest, give sources of data and details of methods of assessment (measurement). Describe comparability of assessment methods if there is more than one group | <b>Methods</b><br><b>Pages 8-9</b>                                   |
| Bias                      | 9       | Describe any efforts to address potential sources of bias                                                                                                                            | <b>Methods</b><br><b>Pages 7-8</b>                                   |
| Study size                | 10      | Explain how the study size was arrived at                                                                                                                                            | <b>Methods</b><br><b>Page 7</b>                                      |
| Quantitative variables    | 11      | Explain how quantitative variables were handled in the analyses. If applicable, describe which groupings were chosen and why                                                         | <b>Methods</b><br><b>Pages 8-9</b>                                   |
| Statistical methods       | 12      | (a) Describe all statistical methods, including those used to control for confounding                                                                                                | <b>Statistical Analysis</b><br><b>paragraph</b><br><b>pages 9-10</b> |
|                           |         | (b) Describe any methods used to examine subgroups and interactions                                                                                                                  | <b>Statistical Analysis</b><br><b>paragraph</b><br><b>pages 9-10</b> |
|                           |         | (c) Explain how missing data were addressed                                                                                                                                          | <b>Statistical Analysis</b><br><b>paragraph</b><br><b>pages 9-10</b> |
|                           |         | (d) If applicable, explain how loss to follow-up was addressed                                                                                                                       | n/a                                                                  |
|                           |         | (e) Describe any sensitivity analyses                                                                                                                                                | n/a                                                                  |

| <b>Results</b>           |     |                                                                                                                                                                                                                                                                                                 |                                                                        |
|--------------------------|-----|-------------------------------------------------------------------------------------------------------------------------------------------------------------------------------------------------------------------------------------------------------------------------------------------------|------------------------------------------------------------------------|
| Participants             | 13* | (a) Report numbers of individuals at each stage of study—eg numbers potentially eligible, examined for eligibility, confirmed eligible, included in the study, completing follow-up, and analysed<br>(b) Give reasons for non-participation at each stage<br>(c) Consider use of a flow diagram | <b>Figure 1</b><br><b>Results</b><br><b>Page 11</b><br><b>Figure 1</b> |
| Descriptive data         | 14* | (a) Give characteristics of study participants (eg demographic, clinical, social) and information on exposures and potential confounders                                                                                                                                                        | <b>Table 1</b><br><b>Pages 29-31</b>                                   |
|                          |     | (b) Indicate number of participants with missing data for each variable of interest                                                                                                                                                                                                             | <b>Table 1</b><br><b>Pages 29-31</b>                                   |
|                          |     | (c) Summarise follow-up time (eg, average and total amount)                                                                                                                                                                                                                                     | <b>n/a</b>                                                             |
| Outcome data             | 15* | Report numbers of outcome events or summary measures over time                                                                                                                                                                                                                                  | <b>Tables 2 and 3</b><br><b>Pages 32-35</b>                            |
| Main results             | 16  | (a) Give unadjusted estimates and, if applicable, confounder-adjusted estimates and their precision (eg, 95% confidence interval). Make clear which confounders were adjusted for and why they were included                                                                                    | <b>Tables 2 and 3</b><br><b>Pages 32-35</b>                            |
|                          |     | (b) Report category boundaries when continuous variables were categorized                                                                                                                                                                                                                       | <b>Table 1</b><br><b>Pages 29-31</b>                                   |
|                          |     | (c) If relevant, consider translating estimates of relative risk into absolute risk for a meaningful time period                                                                                                                                                                                | <b>Tables 2 and 3</b><br><b>Pages 32-35</b>                            |
| Other analyses           | 17  | Report other analyses done—eg analyses of subgroups and interactions, and sensitivity analyses                                                                                                                                                                                                  | <b>n/a</b>                                                             |
| <b>Discussion</b>        |     |                                                                                                                                                                                                                                                                                                 |                                                                        |
| Key results              | 18  | Summarise key results with reference to study objectives                                                                                                                                                                                                                                        | <b>Discussion</b><br><b>Pages 16-17</b>                                |
| Limitations              | 19  | Discuss limitations of the study, taking into account sources of potential bias or imprecision. Discuss both direction and magnitude of any potential bias                                                                                                                                      | <b>Discussion</b><br><b>Pages 16-18</b>                                |
| Interpretation           | 20  | Give a cautious overall interpretation of results considering objectives, limitations, multiplicity of analyses, results from similar studies, and other relevant evidence                                                                                                                      | <b>Discussion</b><br><b>Pages 19-21</b>                                |
| Generalisability         | 21  | Discuss the generalisability (external validity) of the study results                                                                                                                                                                                                                           | <b>Discussion</b><br><b>Pages 20-21</b>                                |
| <b>Other information</b> |     |                                                                                                                                                                                                                                                                                                 |                                                                        |
| Funding                  | 22  | Give the source of funding and the role of the funders for the present study and, if applicable, for the original study on which the present article is based                                                                                                                                   | <b>Manuscript</b><br><b>pages 4 and 21</b>                             |

\*Give information separately for exposed and unexposed groups.

**Note:** An Explanation and Elaboration article discusses each checklist item and gives methodological background and published examples of transparent reporting. The STROBE checklist is best used in conjunction with this article (freely

1 available on the Web sites of PLoS Medicine at <http://www.plosmedicine.org/>, Annals of Internal Medicine at  
2 <http://www.annals.org/>, and Epidemiology at <http://www.epidem.com/>). Information on the STROBE Initiative is  
3 available at <http://www.strobe-statement.org>.  
4  
5  
6  
7  
8  
9  
10  
11  
12  
13  
14  
15  
16  
17  
18  
19  
20  
21  
22  
23  
24  
25  
26  
27  
28  
29  
30  
31  
32  
33  
34  
35  
36  
37  
38  
39  
40  
41  
42  
43  
44  
45  
46  
47  
48  
49  
50  
51  
52  
53  
54  
55  
56  
57  
58  
59  
60

For peer review only
