# Supplementary material for: Maternal over-the-counter analgesics use during pregnancy and adverse perinatal outcomes: cohort study of 151 141 singleton pregnancies
Source: PubMed Central journal article supplement — BMJ Open. 2022 May 2;12(5):e048092. doi: 10.1136/bmjopen-2020-048092 (PMC9066494; doi:10.1136/bmjopen-2020-048092), 2022-05-02
Supplement: bmjopen-2020-048092supp012.pdf [file bmjopen-2020-048092supp012.pdf]

**Figure S1.** Directed acyclic graph (DAG) of analgesics use to amniotic band defects outcome path and relevant measured and unmeasured biasing factors in our analysis.

**Figure S2.** Directed acyclic graph (DAG) of analgesics use to APGAR score outcome path and relevant measured and unmeasured biasing factors in our analysis.

**Figure S3.** Directed acyclic graph (DAG) of analgesics use to cryptorchidism outcome path and relevant measured and unmeasured biasing factors in our analysis.

**Figure S4.** Directed acyclic graph (DAG) of analgesics use to gastroschisis outcome path and relevant measured and unmeasured biasing factors in our analysis.

**Figure S5.** Directed acyclic graph (DAG) of analgesics use to gestation at delivery outcome path and relevant measured and unmeasured biasing factors in our analysis.

**Figure S6.** Directed acyclic graph (DAG) of analgesics use to hypospadias outcome path and relevant measured and unmeasured biasing factors in our analysis.

**Figure S7.** Directed acyclic graph (DAG) of analgesics use to admission to neonatal unit outcome path and relevant measured and unmeasured biasing factors in our analysis.

**Figure S8.** Directed acyclic graph (DAG) of analgesics use to neural tube defects outcome path and relevant measured and unmeasured biasing factors in our analysis.

**Figure S9.** Directed acyclic graph (DAG) of analgesics use to pregnancy outcome path and relevant measured and unmeasured biasing factors in our analysis.

**Figure S10.** Directed acyclic graph (DAG) of analgesics use to standardised birthweight score outcome path and relevant measured and unmeasured biasing factors in our analysis.

**Figure S11.** Directed acyclic graph (DAG) of analgesics use to weight of baby outcome path and relevant measured and unmeasured biasing factors in our analysis.
