# Supplementary material for: Maternal over-the-counter analgesics use during pregnancy and adverse perinatal outcomes: cohort study of 151 141 singleton pregnancies
Source: PubMed Central journal article supplement — BMJ Open. 2022 May 2;12(5):e048092. doi: 10.1136/bmjopen-2020-048092 (PMC9066494; doi:10.1136/bmjopen-2020-048092), 2022-05-02
Supplement: bmjopen-2020-048092supp013.pdf [file bmjopen-2020-048092supp013.pdf]

**Table S1.** Numbers needed to harm (NNH) calculations

| Outcomes                                    | No analgesic<br>(n=107,143)<br>n (%) | At least one<br>analgesic<br>(n=43,998)<br>n (%) | NNH  | Paracetamol<br>(n=24,099)<br>n (%) | NNH | Ibu/Asp/Napr<br>(n=762)<br>n (%) | NNH |
|---------------------------------------------|--------------------------------------|--------------------------------------------------|------|------------------------------------|-----|----------------------------------|-----|
| <b>Gestation at delivery (weeks)</b>        |                                      |                                                  |      |                                    |     |                                  |     |
| >=37                                        | 100,879 (94.2)                       | 39,838 (90.5)                                    |      | 21,589 (89.6)                      |     | 697 (91.5)                       |     |
| <37                                         | 6,264 (5.8)                          | 4,160 (9.5)                                      | 27   | 2,510 (10.4)                       | 22  | 65 (8.5)                         | 37  |
| <b>Pregnancy outcome</b>                    |                                      |                                                  |      |                                    |     |                                  |     |
| Livebirth                                   | 105,949 (98.9)                       | 43,407 (98.7)                                    |      | 23,704 (98.4)                      |     | 747 (98.0)                       |     |
| Stillbirth                                  | 803 (0.7)                            | 405 (0.9)                                        | 500  | 275 (1.1)                          | 250 | 13 (1.7)                         | 100 |
| Neonatal<br>Death                           | 373 (0.3)                            | 182 (0.4)                                        | 1000 | 117 (0.5)                          | 500 | 2 (0.3)                          | n/a |
| Missing                                     | 18 (<0.1)                            | 4 (<0.1)                                         | n/a  | 3 (<0.1)                           | n/a | 0 (0.0)                          | n/a |
| <b>Weight of baby (grams)</b>               |                                      |                                                  |      |                                    |     |                                  |     |
| NBW                                         | 87,966 (82.1)                        | 34,555 (78.6)                                    |      | 19,163 (79.5)                      |     | 605 (79.5)                       |     |
| LBW                                         | 5,910 (5.5)                          | 3,571 (8.1)                                      | 38   | 2,213 (9.2)                        | 39  | 59 (7.7)                         | 46  |
| HBW                                         | 13,233 (12.4)                        | 5,863 (13.3)                                     | 111  | 2,720 (11.3)                       | n/a | 97 (12.7)                        | 333 |
| Missing                                     | 34 (<0.1)                            | 9 (<0.1)                                         | n/a  | 3 (<0.1)                           | n/a | 1 (0.1)                          | n/a |
| <b>Admitted to neonatal unit</b>            |                                      |                                                  |      |                                    |     |                                  |     |
| No                                          | 62,378 (58.2)                        | 32,391 (73.6)                                    |      | 16,342 (67.8)                      |     | 480 (63.0)                       |     |
| Yes                                         | 11,011 (10.3)                        | 7,448 (16.9)                                     | 15   | 3,956 (16.4)                       | 16  | 117 (15.4)                       | 20  |
| Missing                                     | 33,754 (31.5)                        | 4,159 (9.5)                                      | n/a  | 3,801 (15.8)                       | n/a | 762 (21.7)                       | n/a |
| <b>APGAR score at 1 min</b>                 |                                      |                                                  |      |                                    |     |                                  |     |
| Normal                                      | 92,217 (86.1)                        | 38,224 (86.9)                                    |      | 20,593 (85.5)                      |     | 659 (86.5)                       |     |
| <7                                          | 14,335 (13.4)                        | 5,674 (12.9)                                     | n/a  | 3,437(14.3)                        | 111 | 101 (13.3)                       | n/a |
| Missing                                     | 591 (0.6)                            | 100 (0.2)                                        |      | 69 (0.3)                           | n/a | 2 (0.3)                          | n/a |
| <b>APGAR score at 5 min</b>                 |                                      |                                                  |      |                                    |     |                                  |     |
| Normal                                      | 104,292 (97.3)                       | 42,730 (97.1)                                    |      | 23,334 (96.8)                      |     | 738 (96.9)                       |     |
| <7                                          | 2,216 (2.1)                          | 1,163 (2.6)                                      | 200  | 690 (2.9)                          | 125 | 21 (2.8)                         | 143 |
| Missing                                     | 635 (0.6)                            | 105 (0.2)                                        | n/a  | 75 (0.3)                           | n/a | 3 (0.4)                          | n/a |
| <b>Cryptorchidism (only males included)</b> |                                      |                                                  |      |                                    |     |                                  |     |
| No                                          | 54,509 (99.3)                        | 22,616 (99.0)                                    |      | 12,247 (99.1)                      |     | 394 (99.4)                       |     |
| Yes                                         | 357 (0.7)                            | 236 (1.0)                                        | 333  | 107 (0.9)                          | 500 | 1 (0.3)                          | n/a |
| <b>Neural Tube Defects</b>                  |                                      |                                                  |      |                                    |     |                                  |     |
| No                                          | 107,093 (99.9)                       | 43,928 (99.8)                                    |      | 24,077 (99.9)                      |     | 762 (100)                        |     |
| Yes                                         | 50 (0.1)                             | 70 (0.2)                                         | 1000 | 22 (0.1)                           | n/a | 0 (0.0)                          | n/a |
| <b>Amniotic Band Defects</b>                |                                      |                                                  |      |                                    |     |                                  |     |
| No                                          | 107,053 (99.9)                       | 43,936 (99.9)                                    |      | 24,070 (99.9)                      |     | 760 (99.7)                       |     |
| Yes                                         | 90 (0.1)                             | 62 (0.1)                                         | n/a  | 29 (0.1)                           | n/a | 2 (0.3)                          | 500 |
| <b>Hypospadias (only males included)</b>    |                                      |                                                  |      |                                    |     |                                  |     |
| No                                          | 54,607 (99.5)                        | 22,600 (98.9)                                    |      | 12,258 (99.2)                      |     | 390 (98.7)                       |     |
| Yes                                         | 259 (0.3)                            | 252 (1.1)                                        | 125  | 96 (0.8)                           | 200 | 5 (1.3)                          | 100 |
| <b>Gastroschisis</b>                        |                                      |                                                  |      |                                    |     |                                  |     |
| No                                          | 107,120 (99.9)                       | 43,979 (99.9)                                    |      | 24,089 (99.9)                      |     | 762(100)                         |     |
| Yes                                         | 23 (0.1)                             | 19 (0.1)                                         | n/a  | 10 (0.1)                           | n/a | 0 (0.0)                          | n/a |
| <b>At least one outcome*</b>                |                                      |                                                  |      |                                    |     |                                  |     |
| No                                          | 106,367<br>(99.3%)                   | 43,363 (98.6%)                                   |      | 23,835 (98.9%)                     |     | 754 (99.0%)                      |     |
| Yes                                         | 776 (0.7%)                           | 635 (1.4%)                                       | 142  | 264 (1.1%)                         | 250 | 8 (1.0%)                         | 333 |

n/a, not applicable
