# Supplementary material for: Maternal over-the-counter analgesics use during pregnancy and adverse perinatal outcomes: cohort study of 151 141 singleton pregnancies
Source: PubMed Central journal article supplement — BMJ Open. 2022 May 2;12(5):e048092. doi: 10.1136/bmjopen-2020-048092 (PMC9066494; doi:10.1136/bmjopen-2020-048092), 2022-05-02
Supplement: bmjopen-2020-048092supp014.pdf [file bmjopen-2020-048092supp014.pdf]

**Table S2.** Numbers needed to harm (NNH) for exposure to diclofenac (years 2005-2015).

| Outcomes                                    | No analgesic<br>(n=20,544)<br>n (%) | Diclofenac<br>2005-2015<br>(n=10,291)<br>n (%) | NNH |
|---------------------------------------------|-------------------------------------|------------------------------------------------|-----|
| <b>Gestation at delivery (weeks)</b>        |                                     |                                                |     |
| >=37                                        | 19,407 (94.5%)                      | 9,640 (93.7%)                                  |     |
| <37                                         | 1,137 (5.5%)                        | 651 (6.3%)                                     | 125 |
| <b>Pregnancy outcome</b>                    |                                     |                                                |     |
| Livebirth                                   | 20,393 (99.3%)                      | 10,227 (99.4%)                                 |     |
| Stillbirth                                  | 116 (0.5%)                          | 39 (0.4%)                                      | n/a |
| Neonatal<br>Death                           | 35 (0.2%)                           | 25 (0.2%)                                      | n/a |
| <b>Weight of baby (grams)</b>               |                                     |                                                |     |
| NBW                                         | 16,869 (82.1%)                      | 8,116 (78.9%)                                  |     |
| LBW                                         | 965 (4.7%)                          | 572 (5.6%)                                     | 111 |
| HBW                                         | 2,707 (13.2%)                       | 1,600 (15.5%)                                  | 44  |
| Missing                                     | 3 (0.0%)                            | 3 (0.0%)                                       |     |
| <b>Admitted to neonatal unit</b>            |                                     |                                                |     |
| No                                          | 18,224 (88.7%)                      | 8,747 (85.0%)                                  |     |
| Yes                                         | 2,175 (10.6%)                       | 1,492 (14.5%)                                  | 26  |
| Missing                                     | 145 (0.7%)                          | 52 (0.5%)                                      |     |
| <b>APGAR score at 1 min</b>                 |                                     |                                                |     |
| Normal                                      | 18,709 (91.1%)                      | 9,350 (90.9%)                                  |     |
| <7                                          | 1,658 (8.1%)                        | 924 (9.0%)                                     | 111 |
| Missing                                     | 177 (0.9%)                          | 17 (0.2%)                                      |     |
| <b>APGAR score at 5 min</b>                 |                                     |                                                |     |
| Normal                                      | 20,065 (97.7%)                      | 10,096 (98.1%)                                 |     |
| <7                                          | 302 (1.5%)                          | 177 (1.7%)                                     | 500 |
| Missing                                     | 177 (0.9%)                          | 18 (0.2%)                                      |     |
| <b>Cryptorchidism (only males included)</b> |                                     |                                                |     |
| No                                          | 10,284 (98.7%)                      | 5,314 (98.7%)                                  |     |
| Yes                                         | 133 (1.3%)                          | 70 (1.3%)                                      | n/a |
| <b>Neural Tube Defects</b>                  |                                     |                                                |     |
| No                                          | 20,527 (99.9%)                      | 10,263 (99.7%)                                 |     |
| Yes                                         | 17 (0.1%)                           | 28 (0.3%)                                      | 500 |
| <b>Amniotic Band Defects</b>                |                                     |                                                |     |
| No                                          | 20,514 (99.9%)                      | 10,277 (99.9%)                                 |     |
| Yes                                         | 30 (0.1%)                           | 14 (0.1%)                                      | n/a |
| <b>Hypospadias (only males included)</b>    |                                     |                                                |     |
| No                                          | 10,317 (99.0%)                      | 5,308 (98.6%)                                  |     |
| Yes                                         | 100 (1.0%)                          | 76 (1.4%)                                      | 250 |
| <b>Gastroschisis</b>                        |                                     |                                                |     |
| No                                          | 20,538 (99.9%)                      | 10,284 (99.9%)                                 |     |
| Yes                                         | 6 (0.1%)                            | 7 (0.1%)                                       | n/a |
| <b>At least one outcome*</b>                |                                     |                                                |     |
| No                                          | 20,258 (98.6%)                      | 10,097 (98.1%)                                 |     |
| Yes                                         | 286 (1.4%)                          | 194 (1.9%)                                     | 200 |

n/a, not applicable
