# Supplementary figures and images for: Maternal over-the-counter analgesics use during pregnancy and adverse perinatal outcomes: cohort study of 151 141 singleton pregnancies
Source: PubMed Central journal article supplement — BMJ Open. 2022 May 2;12(5):e048092. doi: 10.1136/bmjopen-2020-048092 (PMC9066494; doi:10.1136/bmjopen-2020-048092), 2022-05-02

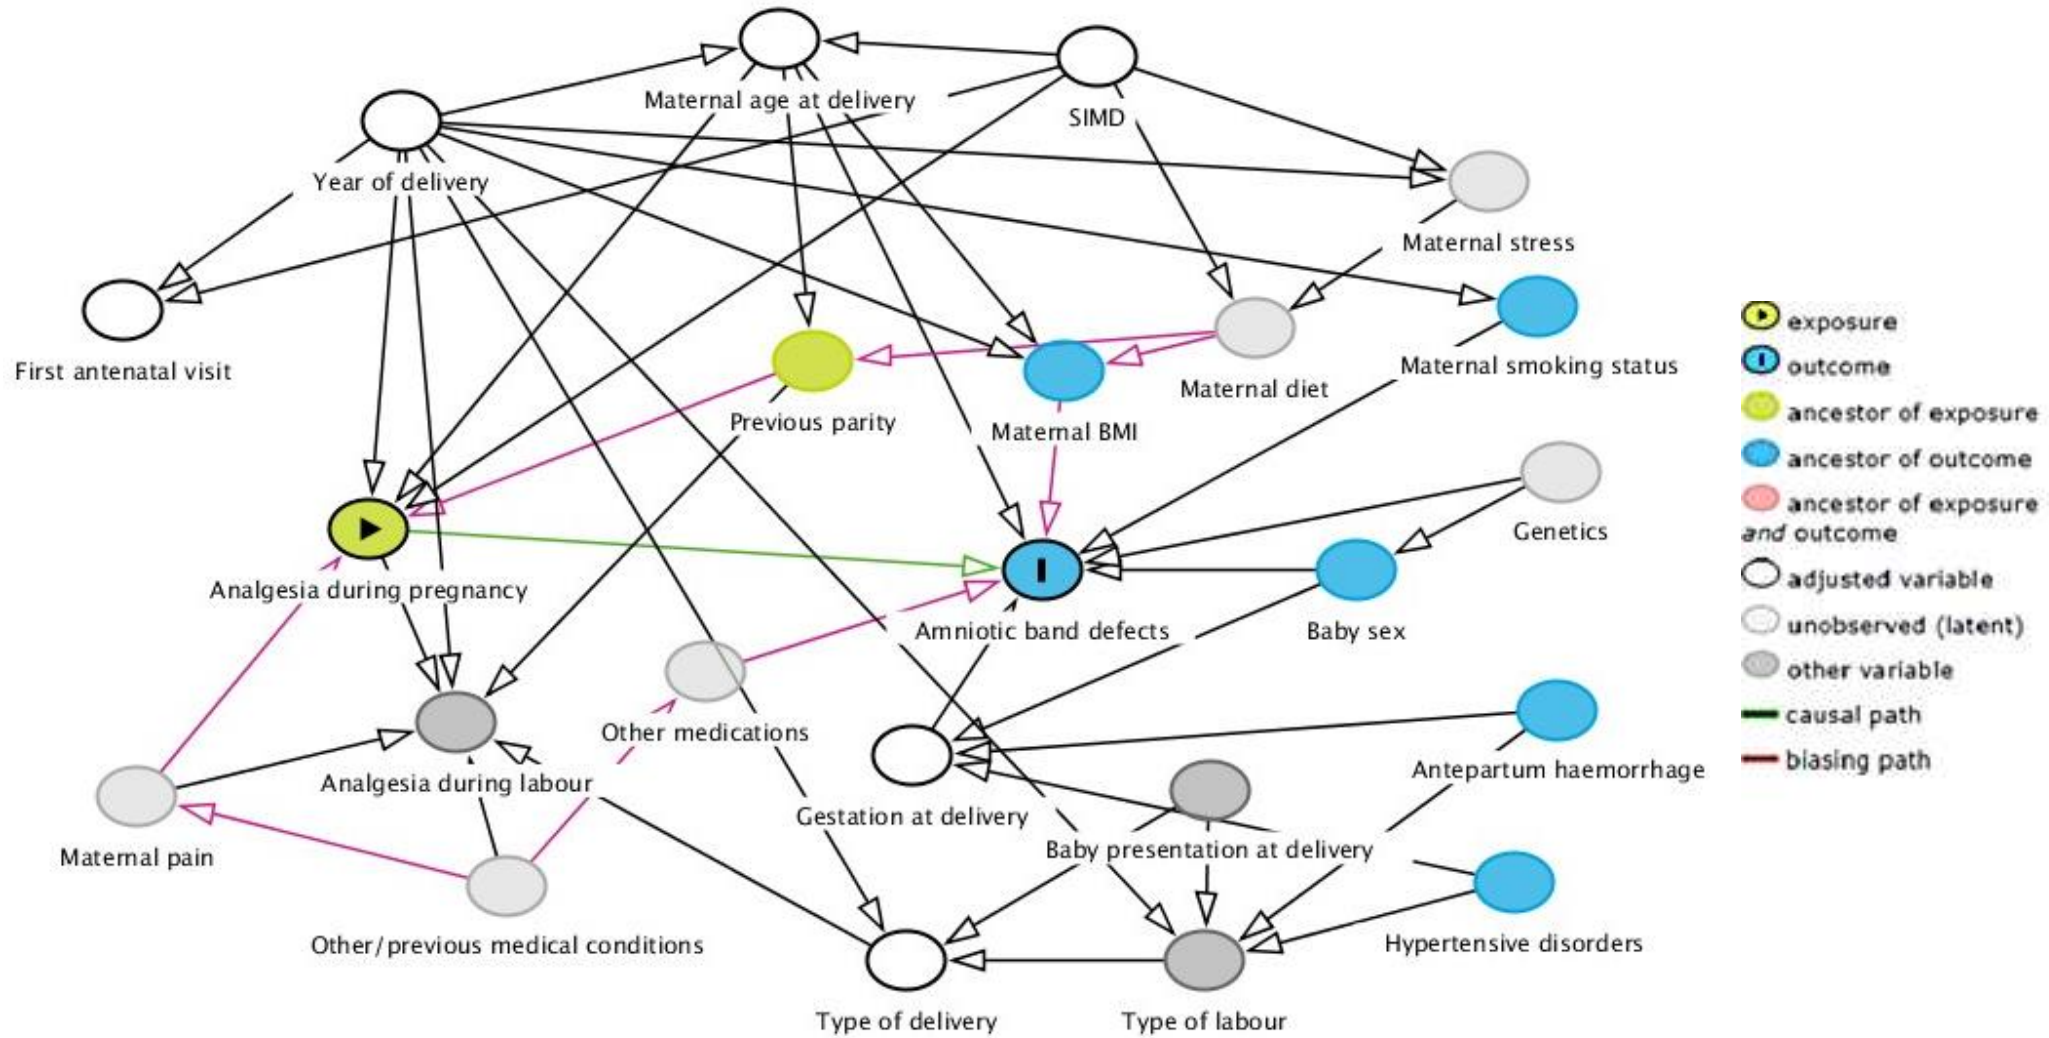

Supplement: bmjopen-2020-048092supp001.pdf [file bmjopen-2020-048092supp001.pdf]

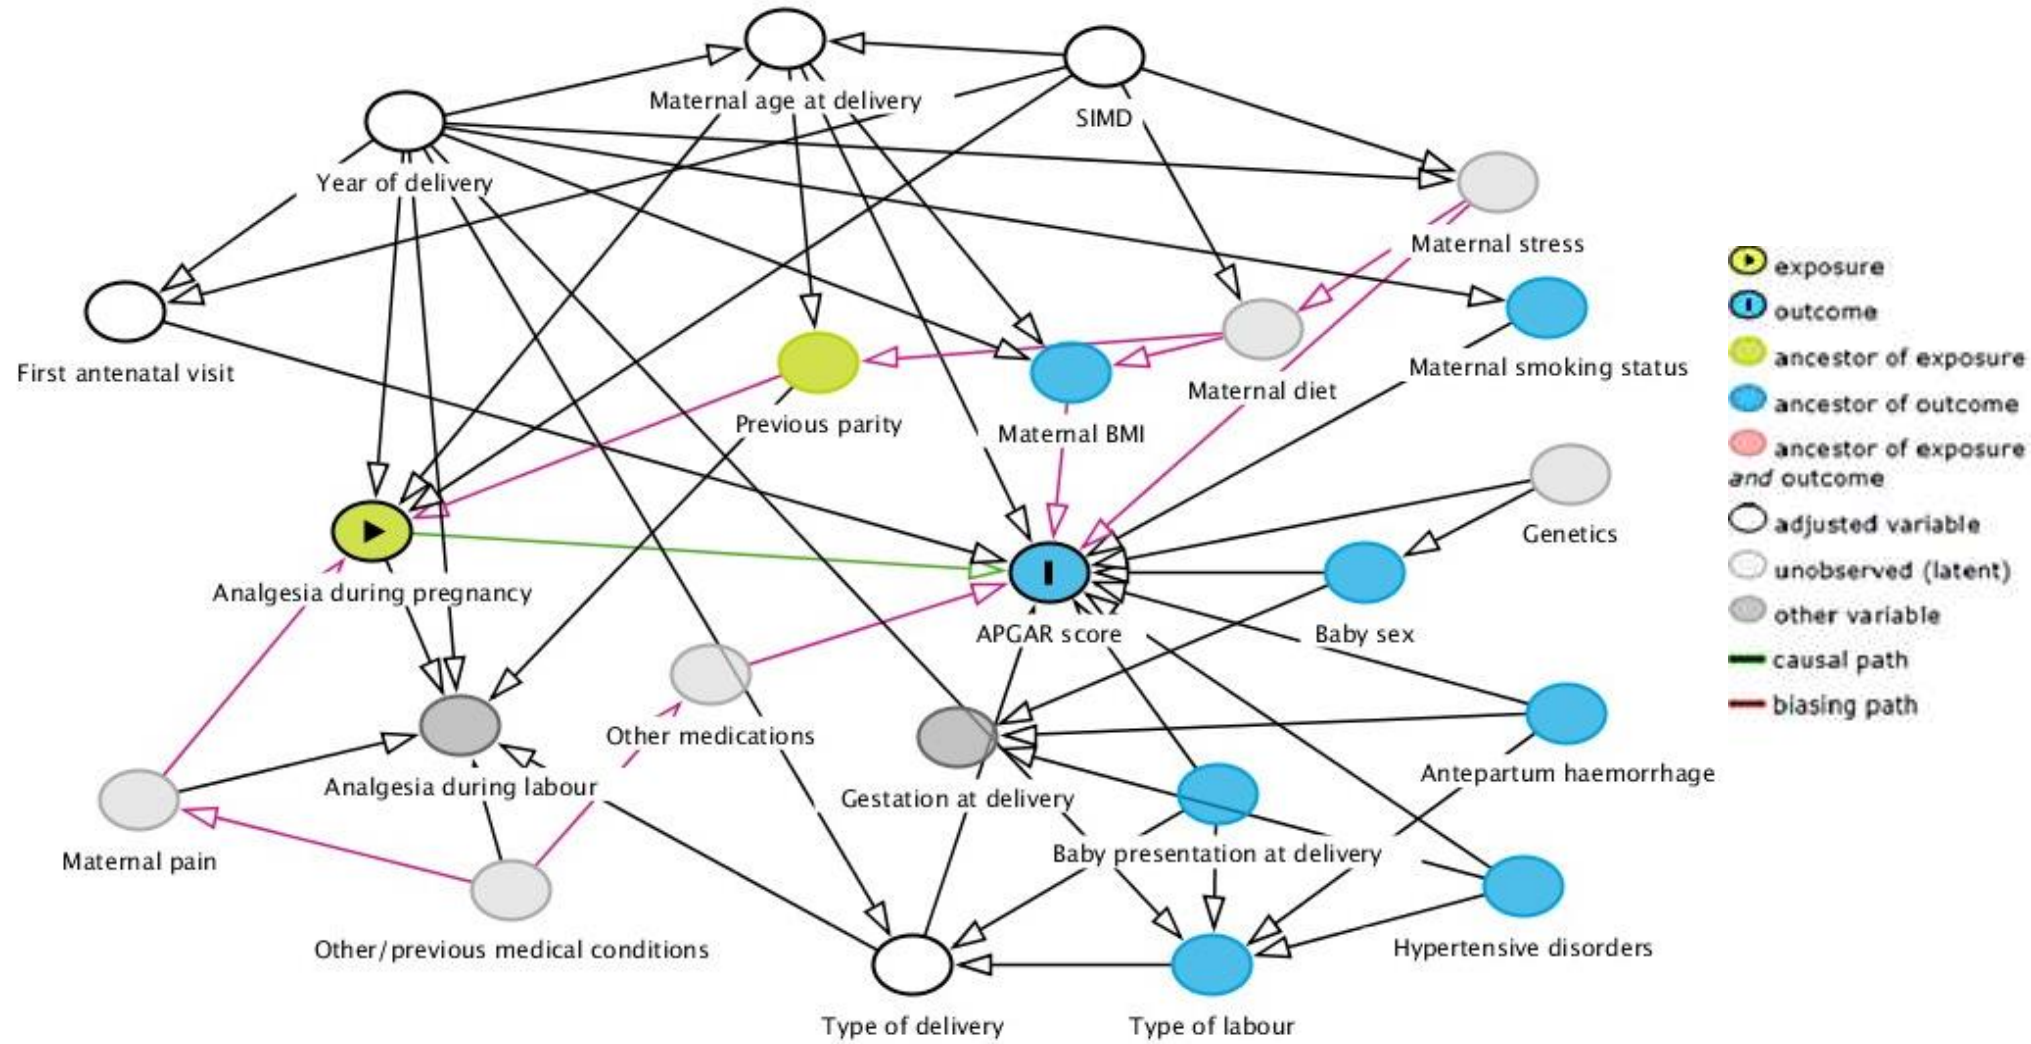

Supplement: bmjopen-2020-048092supp002.pdf [file bmjopen-2020-048092supp002.pdf]

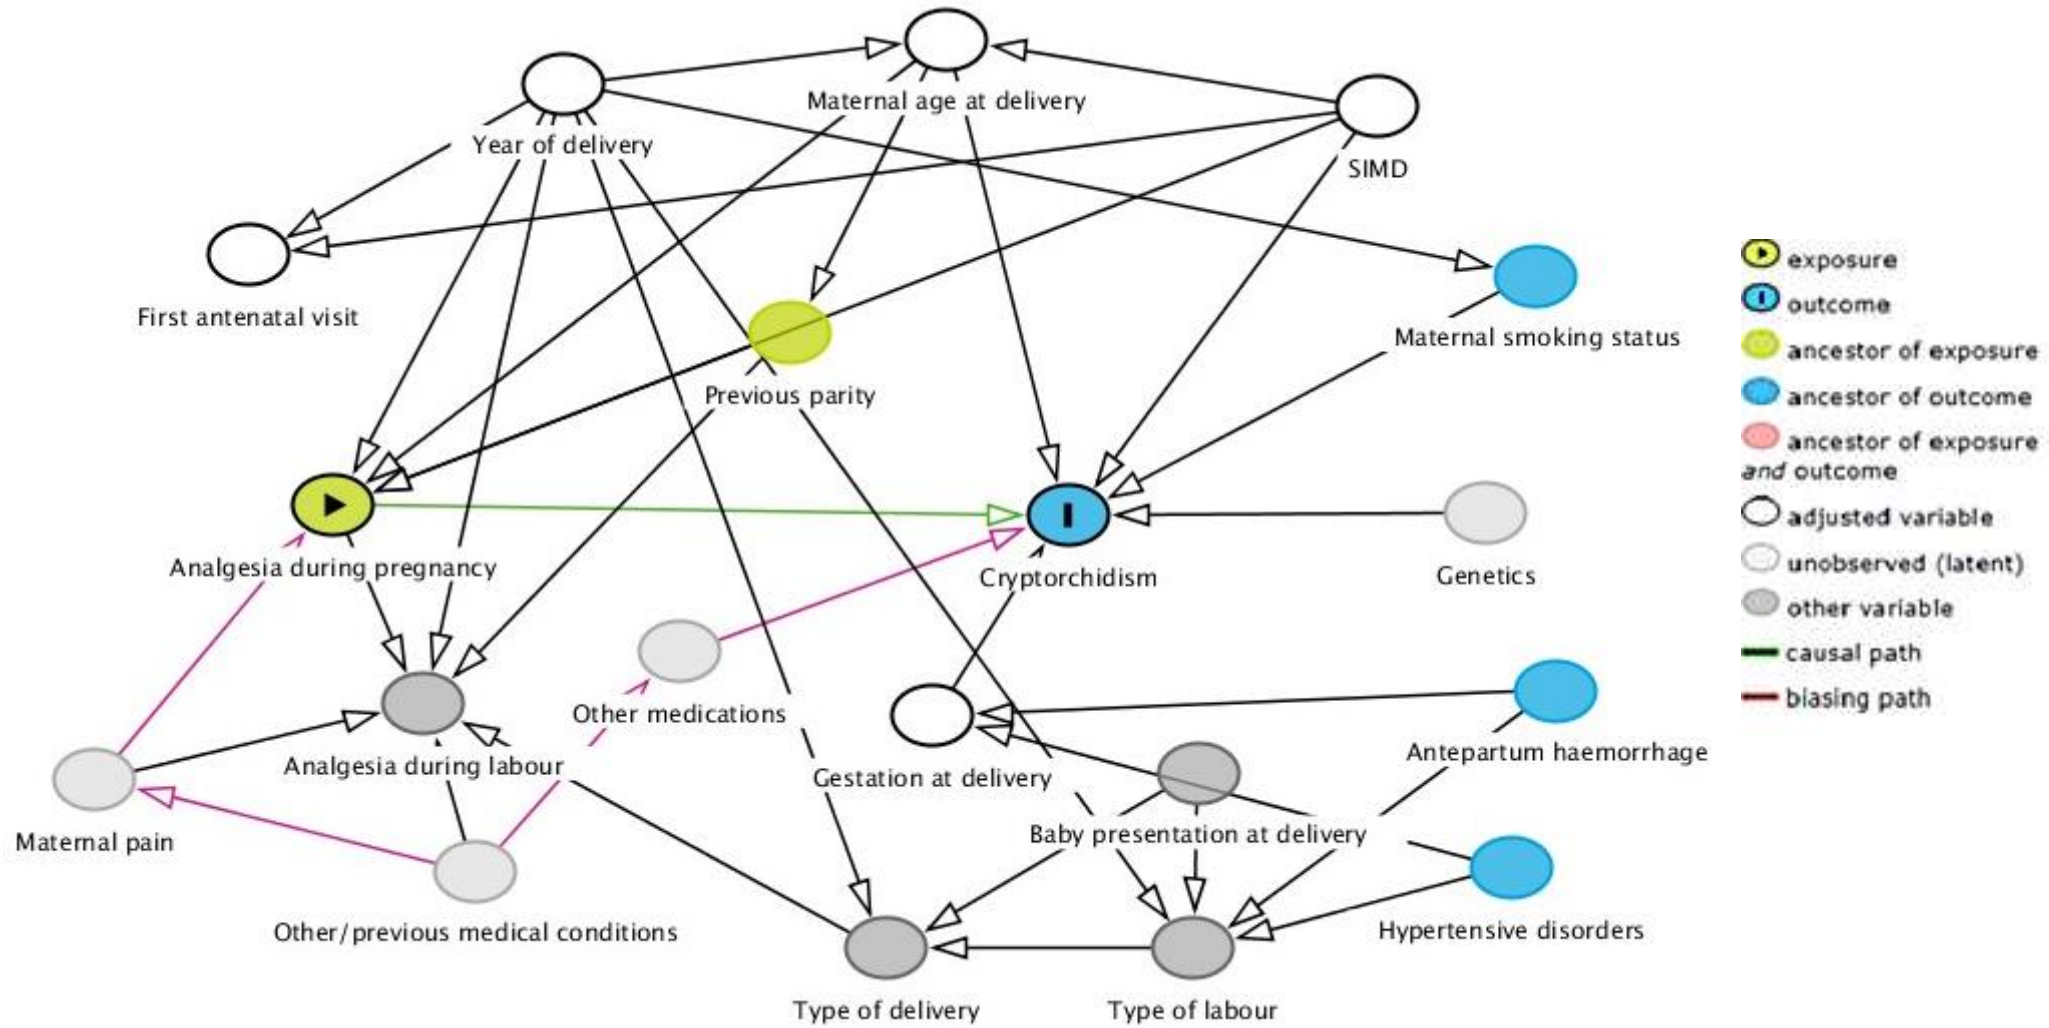

Supplement: bmjopen-2020-048092supp003.pdf [file bmjopen-2020-048092supp003.pdf]

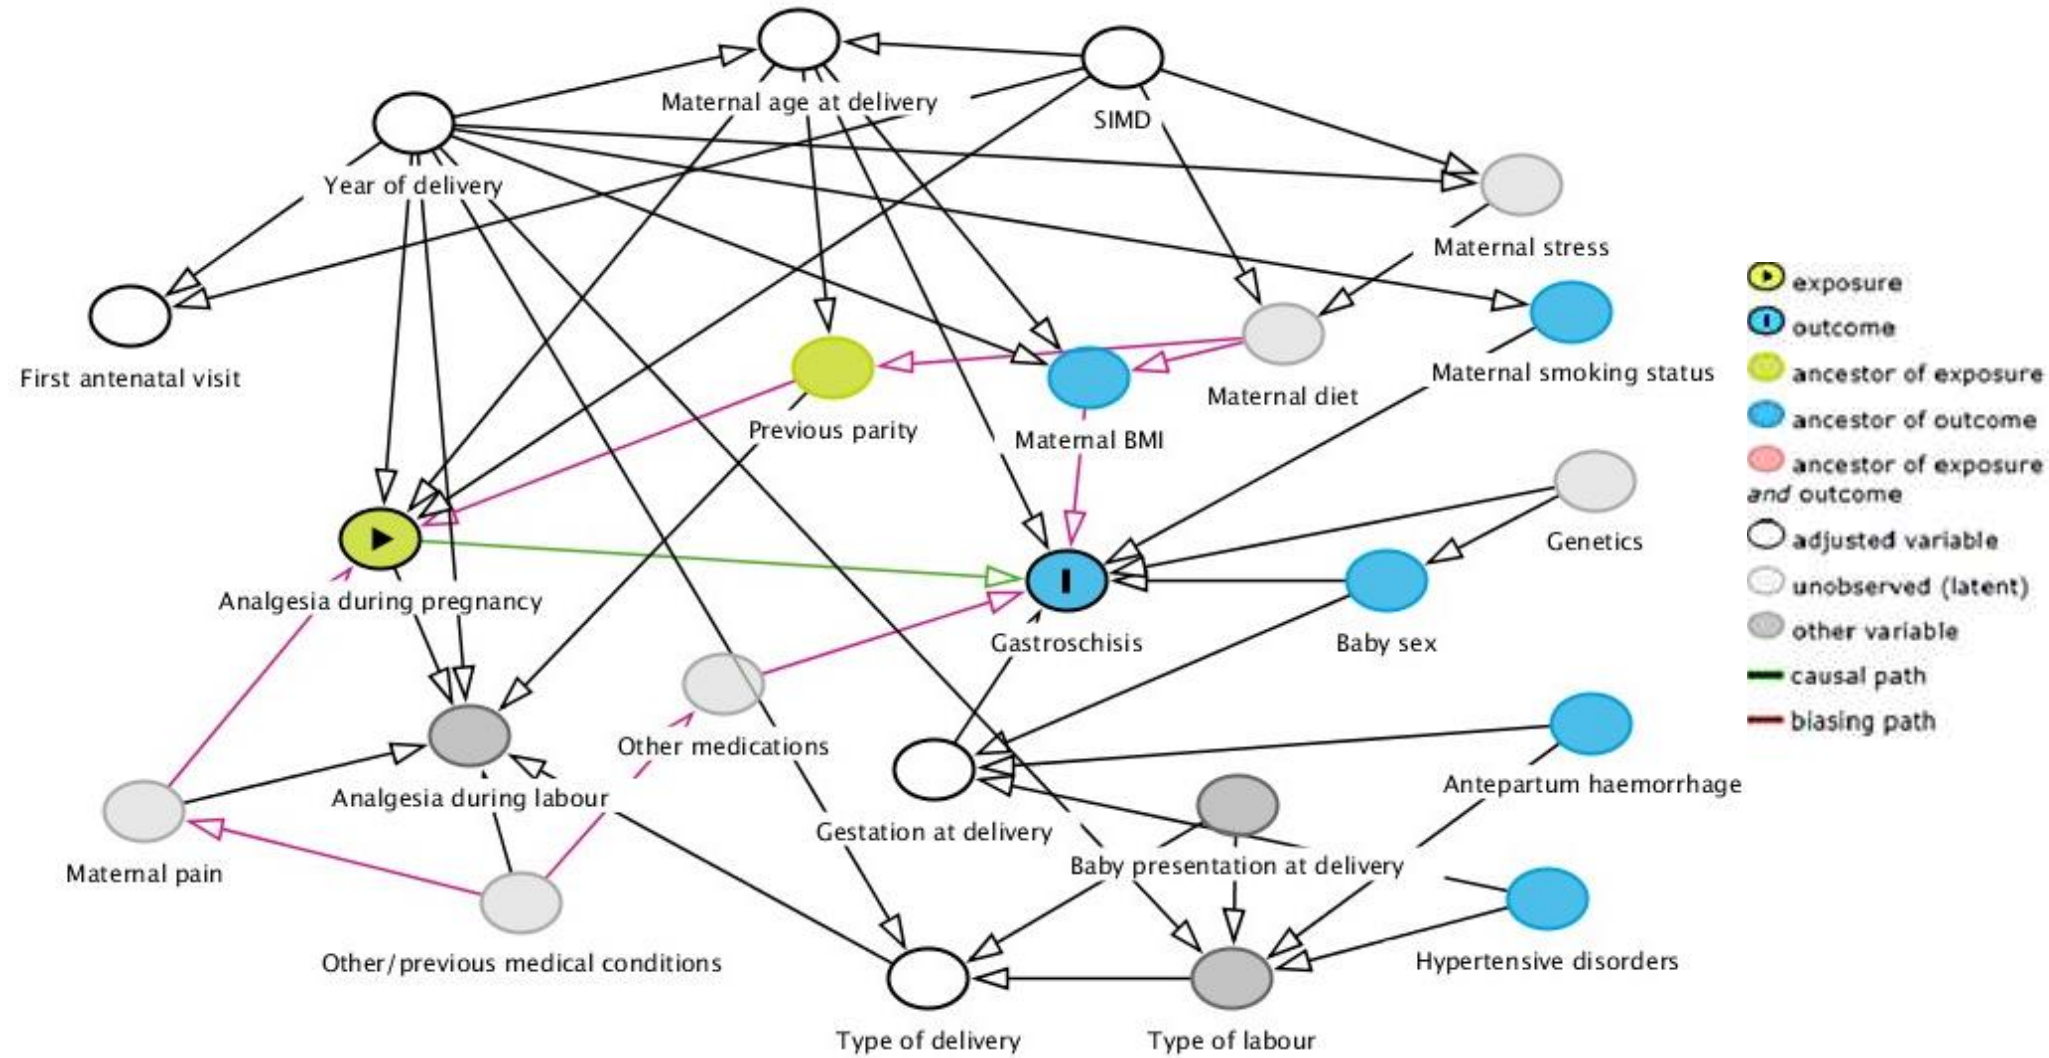

Supplement: bmjopen-2020-048092supp004.pdf [file bmjopen-2020-048092supp004.pdf]

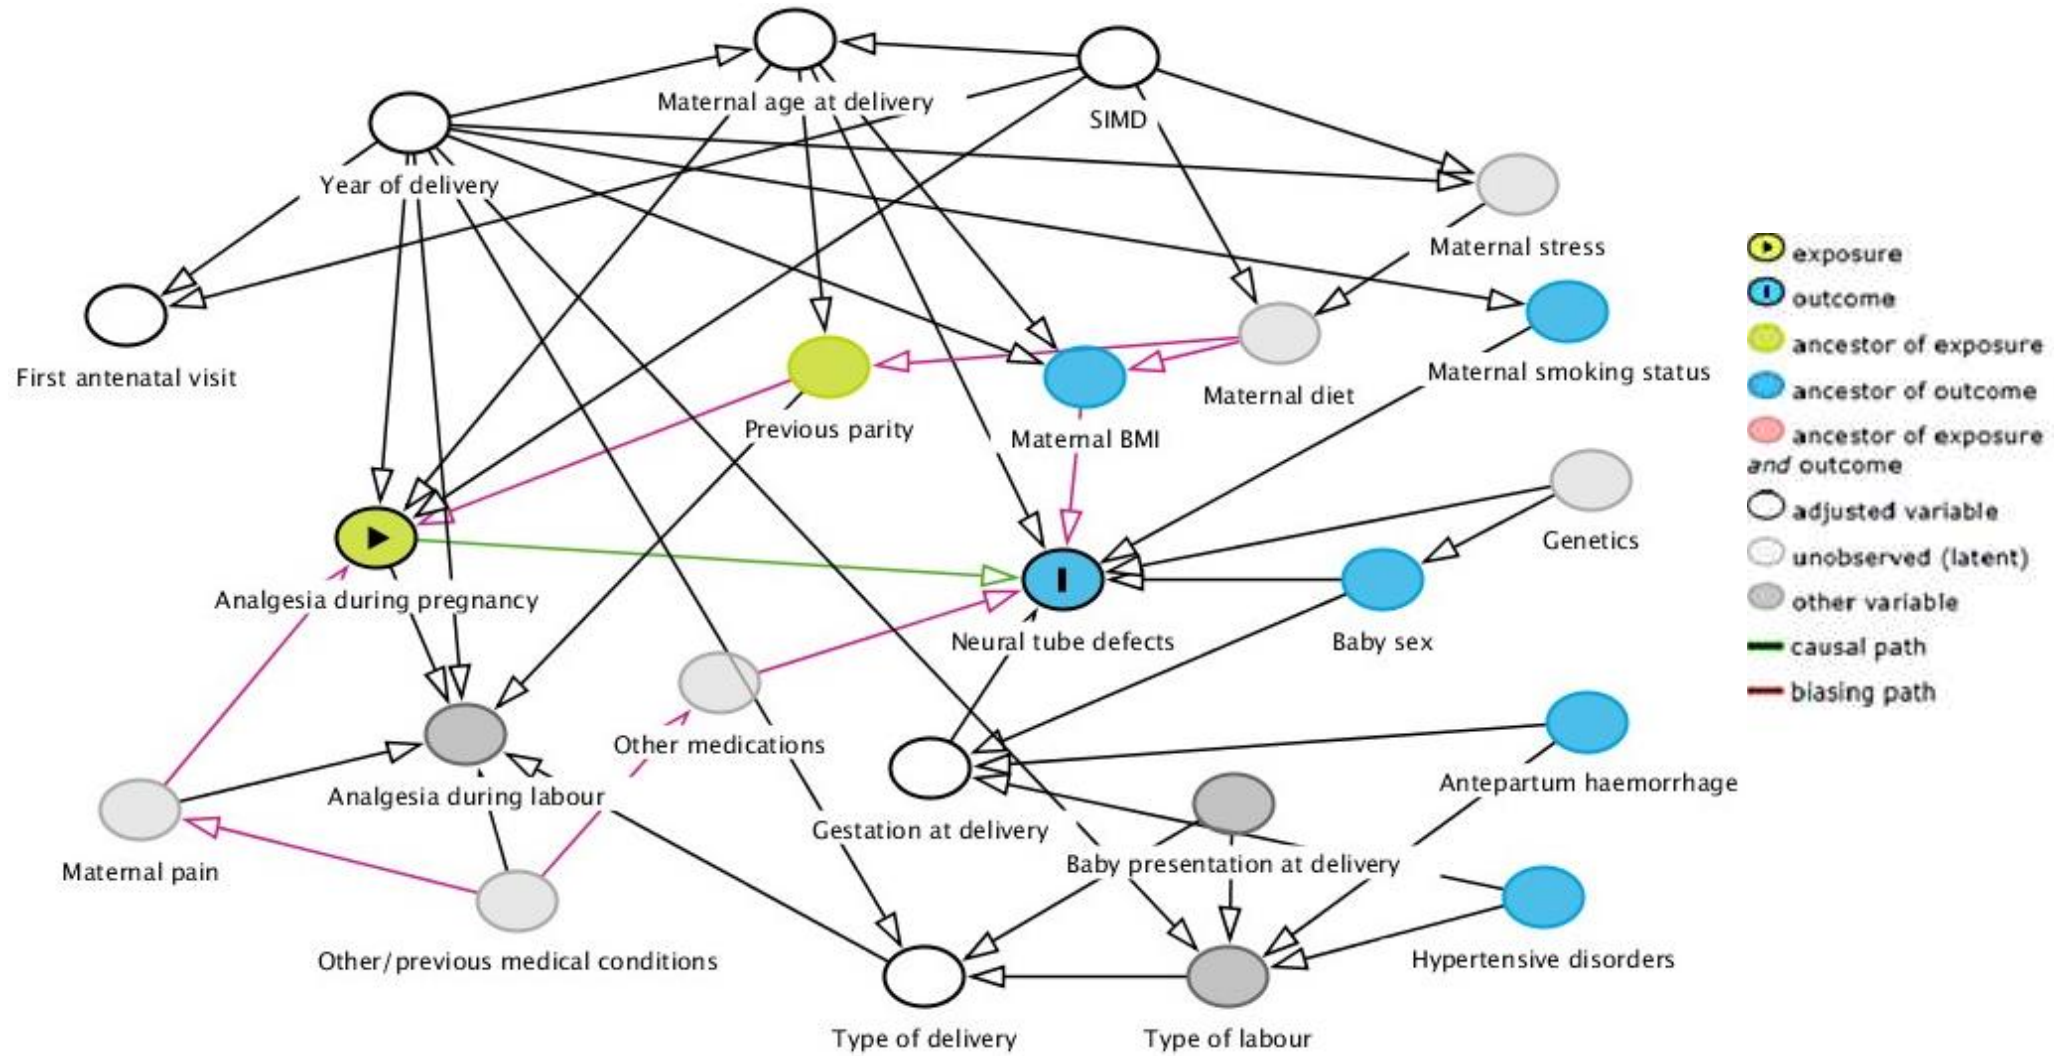

Supplement: bmjopen-2020-048092supp008.pdf [file bmjopen-2020-048092supp008.pdf]

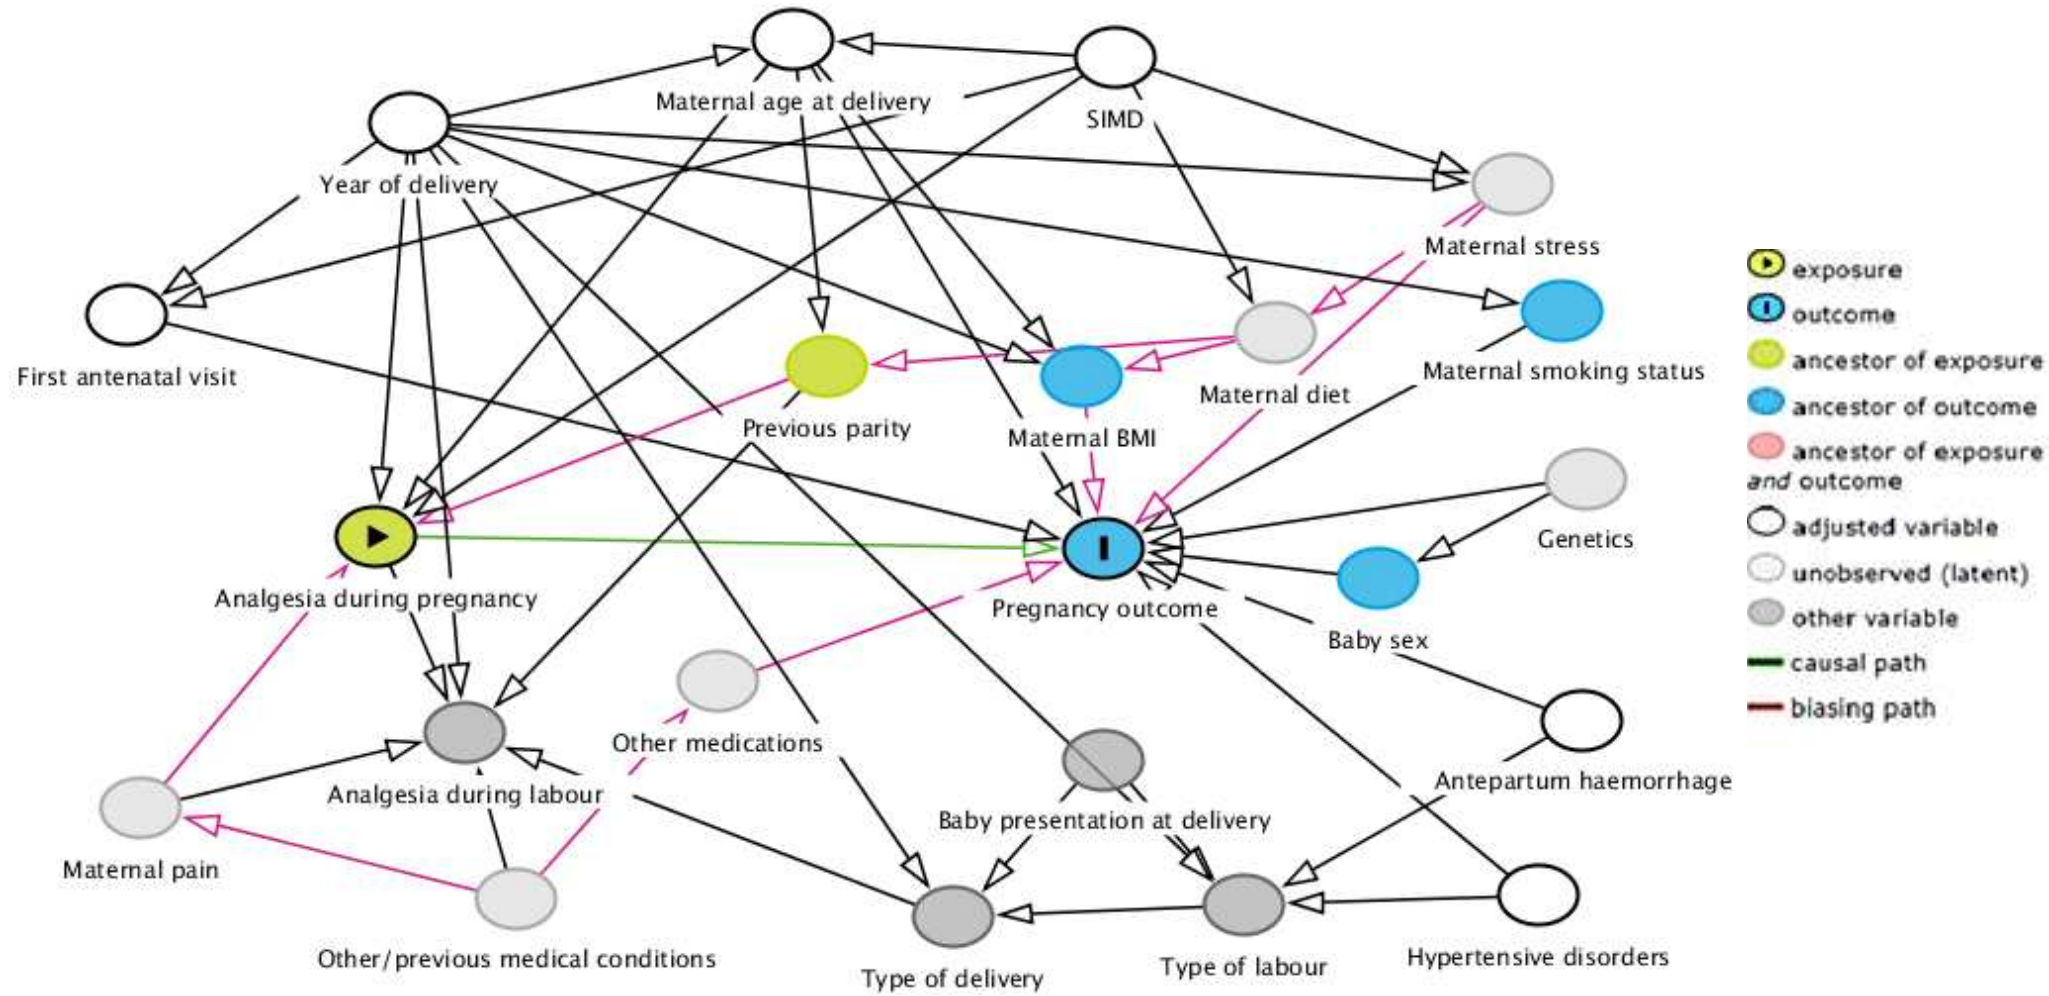

Supplement: bmjopen-2020-048092supp009.pdf [file bmjopen-2020-048092supp009.pdf]

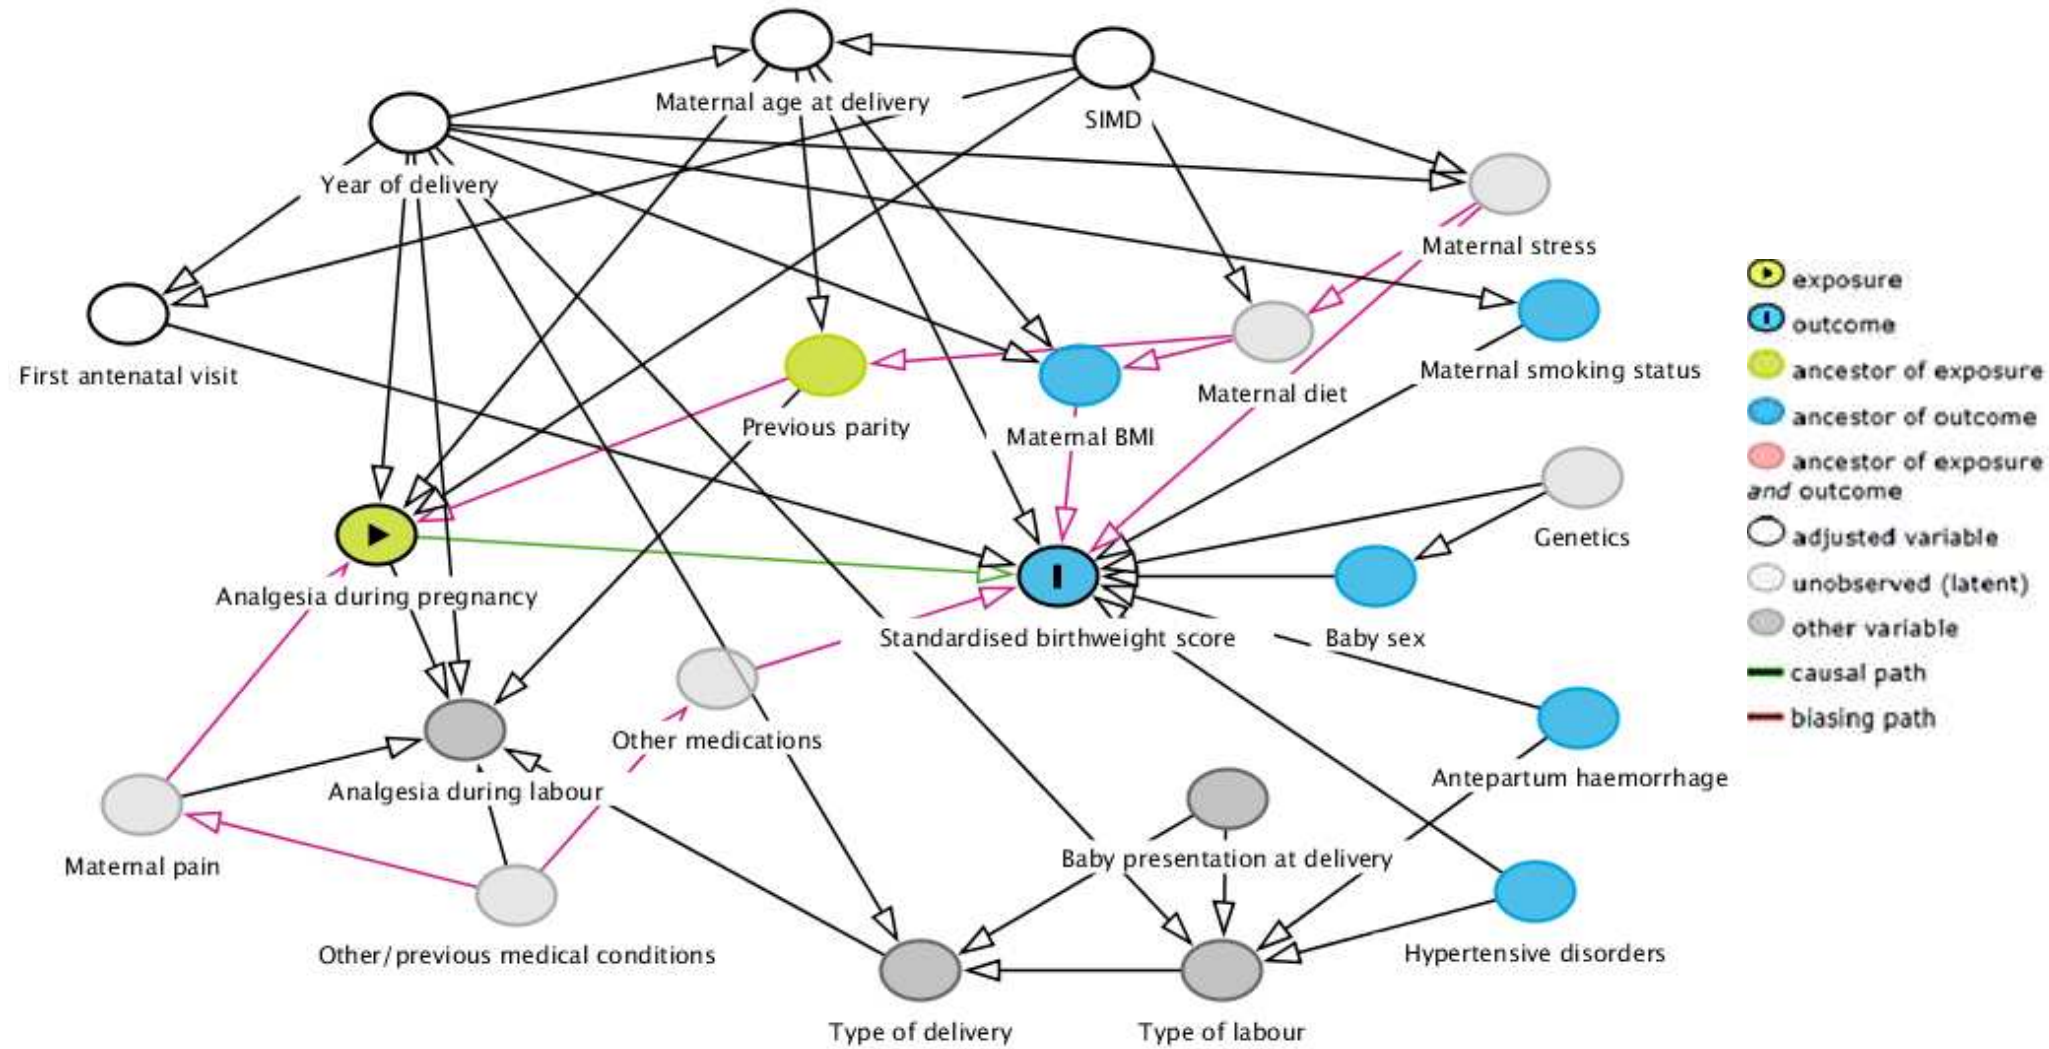

Supplement: bmjopen-2020-048092supp010.pdf [file bmjopen-2020-048092supp010.pdf]
