# Supplementary figures and images for: Maternal over-the-counter analgesics use during pregnancy and adverse perinatal outcomes: cohort study of 151 141 singleton pregnancies
Source: HighWire-hosted journal article supplement (doi:10.1136/bmjopen-2020-048092), 2022-05-01

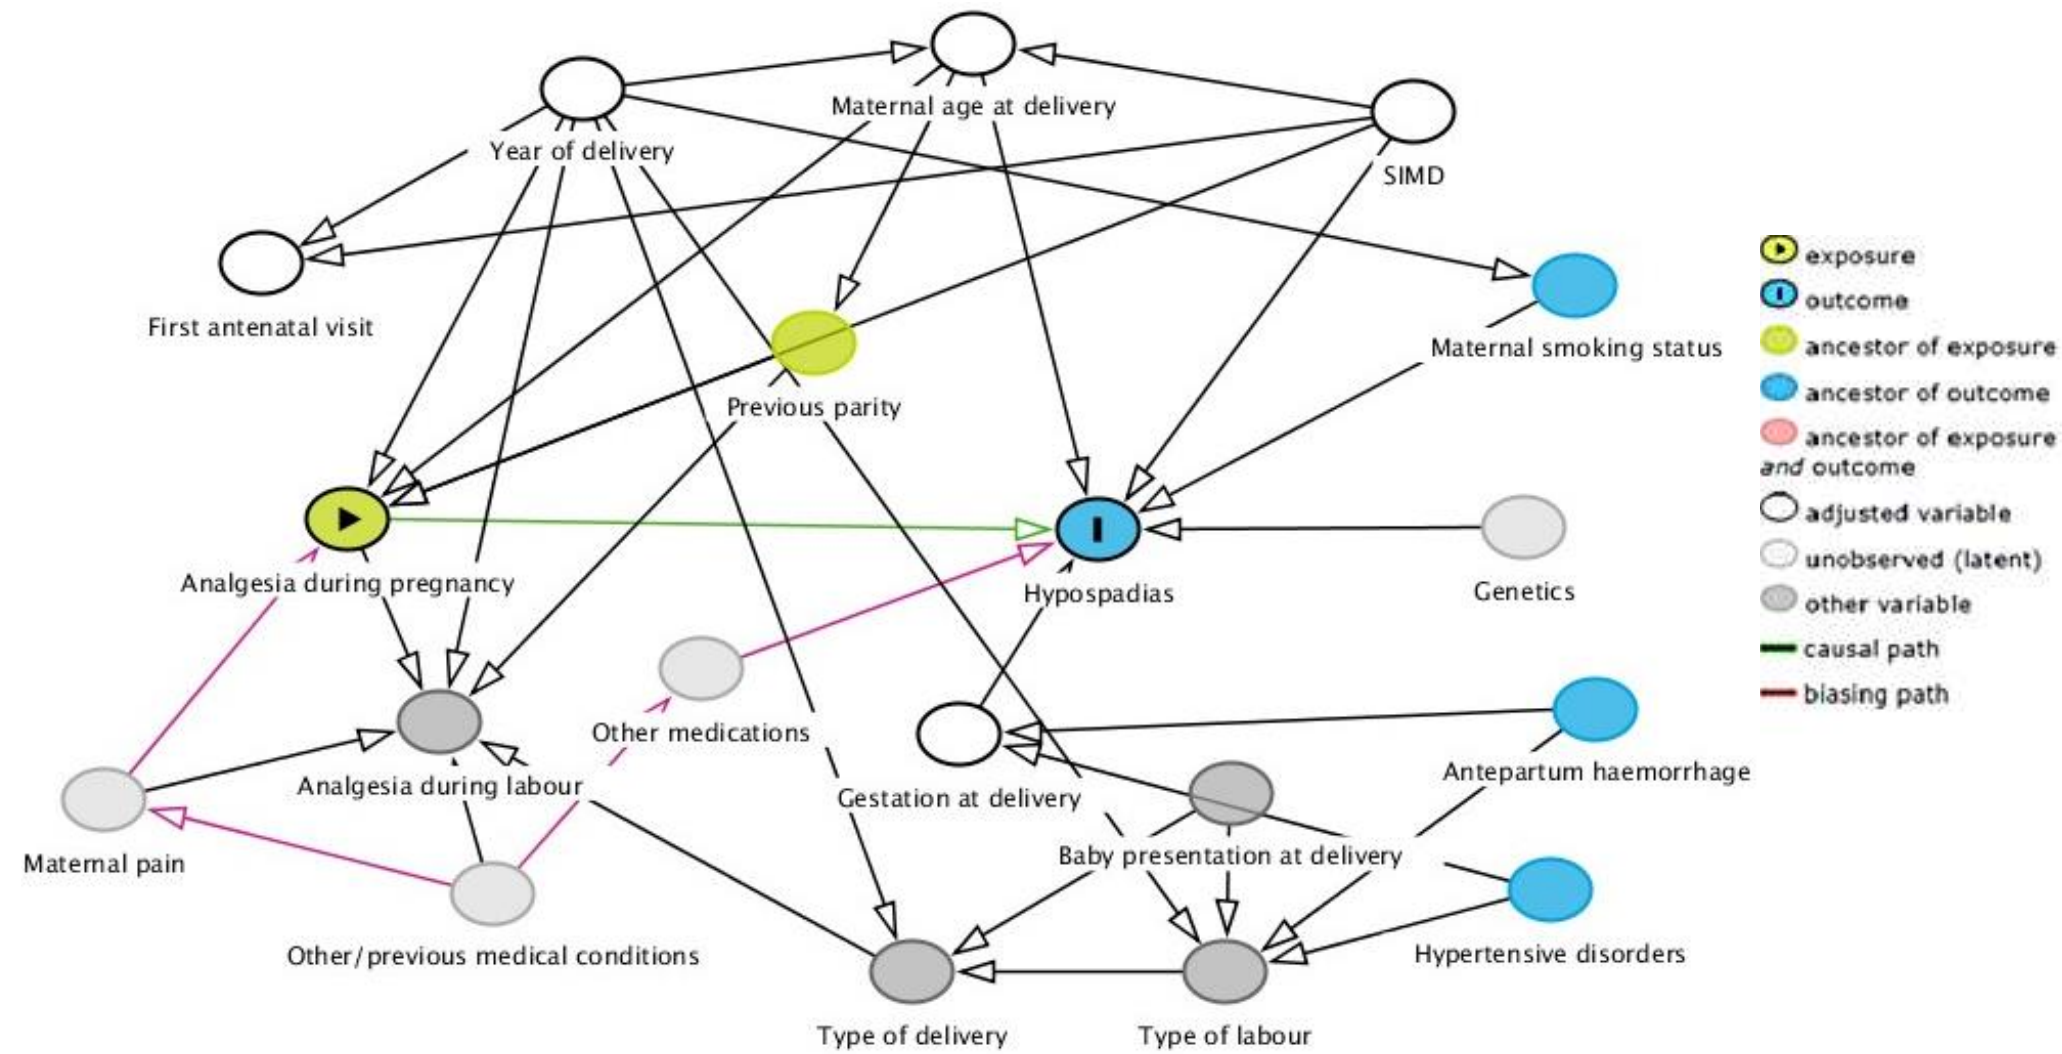

Supplement: bmjopen-2020-048092supp006_data_supplement.pdf [file bmjopen-2020-048092supp006_data_supplement.pdf]

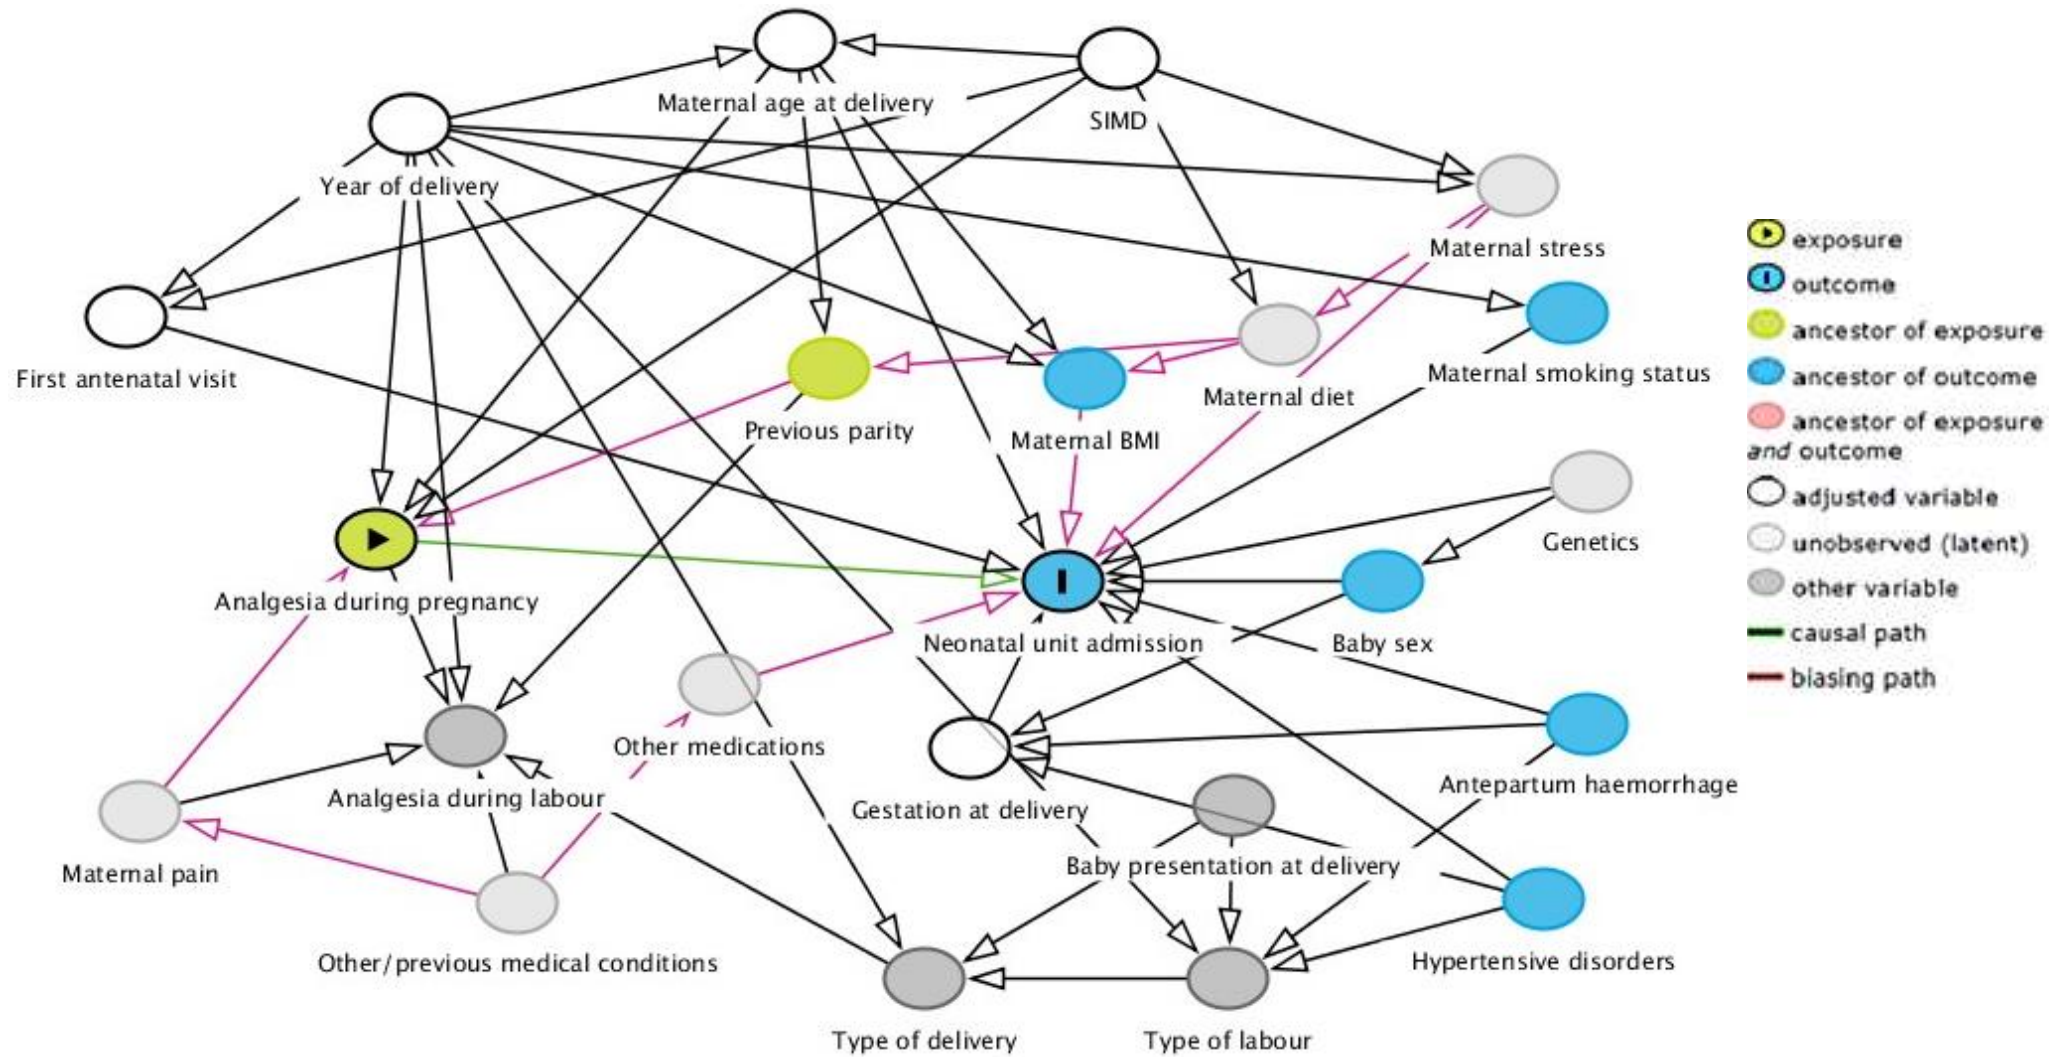

Supplement: bmjopen-2020-048092supp007_data_supplement.pdf [file bmjopen-2020-048092supp007_data_supplement.pdf]
